# Supplementary material for: Prevalence and time trends in overweight and obesity among urban women: an analysis of demographic and health surveys data from 24 African countries, 1991–2014
Source: PubMed Central journal article supplement — BMJ Open. 2017 Oct 27;7(10):e017344. doi: 10.1136/bmjopen-2017-017344 (PMC5665233; doi:10.1136/bmjopen-2017-017344), 2017-10-27
Supplement: bmjopen-2017-017344.draft_revisions.pdf [file bmjopen-2017-017344.draft_revisions.pdf]

# BMJ Open

BMJ Open is committed to open peer review. As part of this commitment we make the peer review history of every article we publish publicly available.

When an article is published we post the peer reviewers' comments and the authors' responses online. We also post the versions of the paper that were used during peer review. These are the versions that the peer review comments apply to.

The versions of the paper that follow are the versions that were submitted during the peer review process. They are not the versions of record or the final published versions. They should not be cited or distributed as the published version of this manuscript.

BMJ Open is an open access journal and the full, final, typeset and author-corrected version of record of the manuscript is available on our site with no access controls, subscription charges or pay-per-view fees (<http://bmjopen.bmj.com>).

If you have any questions on BMJ Open's open peer review process please email [editorial.bmjopen@bmj.com](mailto:editorial.bmjopen@bmj.com)

# BMJ Open

## Prevalence and time trends in overweight and obesity among urban women: An analysis of demographic and health surveys data from 24 African countries, 1991-2014

|                                 |                                                                                                                                                                                                                                                                                                                                                                               |
|---------------------------------|-------------------------------------------------------------------------------------------------------------------------------------------------------------------------------------------------------------------------------------------------------------------------------------------------------------------------------------------------------------------------------|
| Journal:                        | <i>BMJ Open</i>                                                                                                                                                                                                                                                                                                                                                               |
| Manuscript ID                   | bmjopen-2017-017344                                                                                                                                                                                                                                                                                                                                                           |
| Article Type:                   | Research                                                                                                                                                                                                                                                                                                                                                                      |
| Date Submitted by the Author:   | 17-Apr-2017                                                                                                                                                                                                                                                                                                                                                                   |
| Complete List of Authors:       | Amugsi, Dickson; African Population and Health Research Center, Urbanization and Wellbeing<br>DIMBUENE, ZACHARIE; University of Kinshasa, Population Sciences and Development<br>Mberu, Blessing; African Population and Health Research Center<br>Muthuri, Stella; Africa population and Health Research Centre<br>Ezeh, Alex; African Population and Health Research Center |
| <b>Primary Subject Heading</b>: | Epidemiology                                                                                                                                                                                                                                                                                                                                                                  |
| Secondary Subject Heading:      | Nutrition and metabolism, Public health, Global health                                                                                                                                                                                                                                                                                                                        |
| Keywords:                       | Overweight, Obesity, Africa, Prevalence, Trends, Urban                                                                                                                                                                                                                                                                                                                        |
|                                 |                                                                                                                                                                                                                                                                                                                                                                               |

SCHOLARONE™  
Manuscripts

1  
2  
3 1  
4  
5 2  
6  
7  
8 3 **Prevalence and time trends in overweight and obesity among urban women: An analysis of**  
9 4 **demographic and health surveys data from 24 African countries, 1991-2014**  
10  
11 5

12 6 Dickson A. Amugsi<sup>1\*</sup>

13 7 damugsi2002@yahoo.com; [damugsi@aphrc.org](mailto:damugsi@aphrc.org)

14 8 Zacharie T. Dimbuene<sup>2,3</sup>

15 9 [zacharie.tsala.dimbuene@gmail.com](mailto:zacharie.tsala.dimbuene@gmail.com)

16 10 Blessing Mberu<sup>1</sup>

17 11 [bمبرu@aphrc.org](mailto:bمبرu@aphrc.org)

18 12 Stella Muthuri<sup>1</sup>

19 13 [smuthuri@aphrc.org](mailto:smuthuri@aphrc.org)

20 14 Alex C. Ezeh<sup>1</sup>

21 15 [aezeh@aphrc.org](mailto:aezeh@aphrc.org)

22 16 1. African Population and Health Research Center, APHRC Campus, P.O Box 10787-00100,  
23 17 Nairobi, Kenya

24 18 2. Department of Population Sciences and Development, University of Kinshasa, Democratic  
25 19 Republic of the Congo

26 20 3. Statistics Canada, Social Analysis and Modeling Division, Ottawa, Canada K1A 0T6

27 21  
28 22 \* Corresponding author: Dr. Dickson A. Amugsi

29 23 Email: damugsi2002@yahoo.com; [damugsi@aphrc.org](mailto:damugsi@aphrc.org); Mob: +254734869695

30 24 Word count: 3,849

1  
2  
3 29 **Abstract**  
4

5  
6 30 **Objective(s):** To examine the prevalence and trends in overweight and obesity among non-  
7  
8  
9 31 pregnant urban women in Africa over the past two and half decades.  
10

11  
12 32 **Design:** Cross-sectional surveys conducted between 1991 and 2014.  
13

14  
15 33 **Settings:** Demographic and Health Surveys (DHS), repeated cross-sectional data collected in 24  
16  
17  
18 34 African countries.  
19

20  
21 35 **Participants:** Adult non-pregnant women aged 15–49 years. The earlier DHS surveys collected  
22  
23  
24 36 anthropometric data on only those women who had children aged 0–5 years. The main  
25  
26 37 analyses were limited to this subgroup.  
27

28  
29 38 **Results:** The prevalence of overweight and obesity increased in all 24 countries. Trends were  
30  
31  
32 39 statistically significant in 17 of the 24 countries in the case of obesity and 13 of the 24 for  
33  
34 40 overweight. In Ghana, overweight almost doubled while obesity tripled between 1993 and  
35  
36  
37 41 2014. Egypt has the highest levels of overweight and obesity at 44% (95% CI: 42, 46.5) and 39%  
38  
39 42 (95% CI: 36.6, 41.8) respectively in 2014 and the trend showed significant increase from 1995  
40  
41  
42 43 levels. Also, increase in obesity doubled in Kenya, Benin, Niger, Rwanda, Ivory Coast and  
43  
44 44 Uganda, while tripled in Zambia, Burkina Faso, Mali, Malawi and Tanzania. Ethiopia and  
45  
46  
47 45 Madagascar had the lowest prevalence of both obesity and overweight, with overweight  
48  
49 46 ranged from 7 to 12% and obesity from 1 to 4%.  
50

51  
52  
53 47 **Conclusions:** Overweight and obesity are increasing in urban Africa, with obesity having more  
54  
55 48 than doubled or tripled in 12 of the 24 countries. There is an urgent need for deliberate policies  
56  
57  
58  
59  
60

1  
2  
3  
4  
5  
6  
7  
8  
9  
10  
11  
12  
13  
14  
15  
16  
17  
18  
19  
20  
21  
22  
23  
24  
25  
26  
27  
28  
29  
30  
31  
32  
33  
34  
35  
36  
37  
38  
39  
40  
41  
42  
43  
44  
45  
46  
47  
48  
49  
50  
51  
52  
53  
54  
55  
56  
57  
58  
59  
60

49 and interventions to encourage active lifestyles and healthy eating behaviour to curb this trend  
50 in urban Africa.

51 **Keywords:** Overweight, obesity, Africa, prevalence, trends, urban

For peer review only

1  
2  
3 54 **Strengths and Limitations of the Study**  
4  
5

- 6  
7 55 • Use of nationally representative data sets, thereby providing more robust estimates of  
8  
9 56 the prevalence and trends of overweight and obesity  
10  
11 57 • Height and weight used in the calculation of BMI, was objectively measured, reducing  
12  
13 possible misclassification  
14 58  
15  
16 59 • Analysis limited to women with children under 5 years old and may affect the  
17  
18 generalizability of the findings to all women  
19 60  
20  
21 61 • Lack of uniformity in the definition of urban and rural settings across countries  
22  
23  
24  
25 62  
26  
27  
28 63  
29  
30  
31 64  
32  
33  
34 65  
35  
36  
37 66  
38  
39  
40  
41 67  
42  
43  
44 68  
45  
46  
47 69  
48  
49  
50 70  
51  
52  
53 71  
54  
55  
56  
57 72  
58  
59  
60

1  
2  
3 73 **Introduction**  
4  
5

6 74 Overweight and obesity are global public health problems, especially among women in urban  
7  
8 75 settings (1, 2). Worldwide, it is estimated that 2.8 million people die each year as a result of  
9  
10 76 being overweight or obese, and that 35.8 million of global disability-adjusted life years (DALYs)  
11  
12 77 are caused by overweight and obesity (3). There is also evidence that the risks of coronary heart  
13  
14 78 disease, ischemic stroke and type 2 diabetes mellitus increase steadily with increasing body  
15  
16 79 mass index (BMI), a measure of weight relative to height (3, 4). Furthermore, high BMI is found  
17  
18 80 to elevate the risk of breast, colon, prostate, endometrium, kidney and gall bladder cancers (3).  
19  
20 81 A recent study showed that overweight and obesity are linked to 13 different cancers (5). Thus,  
21  
22 82 there is an increased risk of co-morbidities for individuals with a body mass index of 25.0 to  
23  
24 83 29.9 kg/m<sup>2</sup> (defined as overweight), and moderate to severe risk of co-morbidities for  
25  
26 84 individuals with a body mass index greater than 30 kg/m<sup>2</sup> (defined as obesity) (3, 6). The World  
27  
28 85 Health Organization (WHO) (3, 6) recommends that for optimum health, the median body mass  
29  
30 86 index for an adult population should be in the range of 21 to 23 kg/m<sup>2</sup>, while the goal for  
31  
32 87 individuals should be to maintain body mass index in the range 18.5 to 24.9 kg/m<sup>2</sup>. This is often  
33  
34 88 difficult to achieve as evidence shows that global overweight and obesity trends are on the rise,  
35  
36 89 with the developing world now bearing the brunt of the surge (7). This dynamic calls for more  
37  
38 90 studies to systematically document these trends over time, especially in developing country  
39  
40 91 contexts.  
41  
42  
43  
44  
45  
46  
47  
48  
49  
50

51  
52 92  
53  
54  
55  
56  
57  
58  
59  
60

1  
2  
3 93 Hitherto, overweight and obesity were not public health issues on the African continent.  
4  
5  
6 94 However, rapid changes have been observed, and many countries in Africa are currently  
7  
8  
9 95 confronted with overweight and obesity, particularly among women, coupled with a resulting  
10  
11 96 increase in the prevalence of non-communicable diseases (NCDs) (4, 7, 8). In Africa, women had  
12  
13 97 approximately double the obesity prevalence of men (3), with urban settings being the most  
14  
15  
16 98 affected. Thus, the burden of overweight and obesity among urban women is increasing at an  
17  
18  
19 99 alarming rate in developing countries, and particularly in Africa for that matter (1, 9). This trend  
20  
21 100 may be attributable to an increased intake of energy-dense foods that are high in fat; and an  
22  
23 101 increase in physical inactivity due to the increasing sedentary nature of many occupations,  
24  
25  
26 102 increased use of motorized transportation, and urbanization (1, 10-12). Increasingly, sedentary  
27  
28 103 lifestyles and high consumption of energy dense diets account for the increasing burden of  
29  
30  
31 104 overweight and obesity in urban settings of low and middle-income countries (LMIC) (13-15).  
32  
33 105 Various other studies have argued that the association between urban residence and obesity in  
34  
35  
36 106 LMICs is driven largely by higher individual- and community-level socioeconomic status (SES) in  
37  
38  
39 107 urban areas, suggesting that urban residence alone may not cause increased body weight in  
40  
41 108 developing countries (10). However, recent studies suggest that the distribution of overweight  
42  
43  
44 109 by SES is changing in developing countries (4, 16, 17). For example, lower SES populations in  
45  
46  
47 110 some of these countries now have higher prevalence of overweight, mimicking long-standing  
48  
49 111 associations between low SES and poorer health in LMICs (4, 16-18). This changing trend is  
50  
51 112 particularly widespread among the urban population. A study in urban poor settlements in  
52  
53  
54 113 Nairobi, Kenya confirmed high levels of overweight and obesity among women (19). Another  
55  
56 114 study using data from 7 African countries showed that the increase in overweight and obesity  
57  
58  
59  
60



1  
2  
3 115 was higher among the poorest urban dwellers compared to the richest population subgroup  
4  
5  
6 116 (13).  
7  
8

9 117  
10  
11  
12 118 Despite the emerging and worrying trend of increased overweight and obesity, and recognition  
13  
14  
15 119 of the potential rise in chronic diseases in recent times in Africa, little effort has been made in  
16  
17 120 addressing overweight and obesity on the continent (20). Consequently, an analysis of  
18  
19  
20 121 overweight and obesity in this study across several countries in the region, is a critical step in  
21  
22 122 the provision of insights into the extent of the problem over time, especially in urban settings,  
23  
24  
25 123 which is needed to inform policy and program interventions to address the challenge in urban  
26  
27 124 Africa.  
28  
29

30 125  
31  
32  
33  
34 126 It is worth noting that while there are a number of studies that investigated overweight and  
35  
36 127 obesity in Africa; most either focused on one country (8), lumped urban and rural data together  
37  
38  
39 128 in their analyses (2, 8), analyzed overweight and obesity together (18), or used one data point  
40  
41 129 (21). These attempts may mask the seriousness of the problem in urban settings and the  
42  
43  
44 130 important differences in the trends and prevalence of overweight and obesity over time. Also,  
45  
46 131 the presentation of the results in some of these studies makes it difficult for policy makers to  
47  
48  
49 132 appreciate the extent of the problem. The present study elucidates the prevalence and time  
50  
51 133 trends in overweight and obesity separately, and presents the results in a way that makes it  
52  
53  
54 134 easier for policy makers to understand the extent of the problem in urban settings.  
55

56  
57 135  
58  
59  
60

1  
2  
3 136 **Methods**  
4

5  
6  
7 137 **Data sources and participants**  
8

9  
10 138 The study used data from the Demographic and Health Surveys (DHS) programme. These are  
11  
12 139 nationally representative, repeated cross-sectional household surveys collected primarily in  
13  
14 140 lower- and middle-income countries approximately every 5 years and standardized to enable  
15  
16 141 cross-country comparisons (22, 23). We restricted our analysis to data collected in 24 sub-  
17  
18 142 Saharan African countries between 1991 and 2014, and containing individual anthropometric  
19  
20 143 data. There were a total of 137 survey cycles in the 24 countries, and the number of survey  
21  
22 144 cycles per country ranged between three (11/137, four (8/137), and five (5/137) in the time  
23  
24 145 period under consideration. These countries were selected solely based on the number of data  
25  
26 146 points (at least 3) and the availability of anthropometric data. Datasets of countries that met  
27  
28 147 the minimum requirement in terms of data points were downloaded. Data from a total 29  
29  
30 148 countries were downloaded. The second stage was to examine the data for the availability of  
31  
32 149 anthropometric data. All datasets missing anthropometric data were excluded in the analysis.  
33  
34 150 For example, the very first DHS, conducted between 1987 and 1990 did not collect maternal  
35  
36 151 anthropometric data. Hence, the dataset for this period were excluded in the analysis.  
37  
38 152 Secondly, countries with three datasets, but reduced to two data points due to one of the  
39  
40 153 datasets not having anthropometric data were also excluded in the analysis.  
41  
42  
43  
44  
45  
46  
47  
48  
49

50  
51 154

52  
53  
54 155 The DHS employs a multistage sampling design. The first stage involves selecting sample points  
55  
56 156 or clusters from an updated master sampling frame constructed from the National Population  
57  
58  
59  
60

1  
2  
3 157 and Housing Census data of the respective countries. The clusters are then selected using  
4  
5  
6 158 systematic sampling with probability proportional to size. A household listing operation is then  
7  
8  
9 159 conducted in all the selected clusters to provide a sampling frame for the second stage  
10  
11 160 selection of households. The second stage of selection involves the systematic sampling of  
12  
13 161 households listed in each cluster. The primary objective of the second stage of selection is to  
14  
15  
16 162 ensure adequate numbers of completed individual interviews to provide estimates for key  
17  
18 163 indicators with acceptable precision (23). We limited our analyses to adult non-pregnant  
19  
20  
21 164 women of reproductive age, 15–49 years in all countries. This is because pregnant women  
22  
23 165 naturally gain weight during the course of their pregnancy, including them in the analysis may  
24  
25  
26 166 present a misleading picture about the issue of overweight and obesity among women. Since  
27  
28 167 the earlier DHS surveys collected anthropometry data on only those women who had children  
29  
30  
31 168 aged 0–5 years (18, 24), we further restricted our main analyses to this subgroup. For the total  
32  
33 169 of 224,940 urban women who met eligibility criteria, anthropometric data were available for  
34  
35  
36 170 191,836 (85.3 %).  
37  
38  
39 171

#### 172 **Ethics statement**

173 The DHS obtained ethical clearance from the ethical committees of the respective countries  
174 before the surveys were conducted. Written informed consent was obtained from the women  
175 before participation. The authors of this paper sought and obtained permission from the DHS  
176 program for the use of the data. The data were completely anonymized and therefore the  
177 authors did not seek further ethical clearance before their use.

1  
2  
3 1784  
5  
6  
7 179 **Variables**

8  
9  
10 180 Height and weight were measured objectively by trained field technicians using standard  
11  
12 181 techniques (23). Weight measurements were taken using electronic Seca scales with a digital  
13  
14 182 screen. Height measurements were taken using a measuring board produced by Shorr  
15  
16  
17 183 Productions. Height and weight measurements were then used to estimate the study  
18  
19  
20 184 participants' body mass index (BMI). BMI, also referred to as Quetelet's Index (25), was derived  
21  
22 185 by dividing weight in kilograms by the squared height in meters. Based on the BMI ( $\text{kg}/\text{m}^2$ )  
23  
24 186 estimates, and according to World Health Organization guidelines (26), the participants were  
25  
26  
27 187 classified as overweight ( $25.0\text{-}29.9 \text{ kg}/\text{m}^2$ ) and obese ( $\geq 30.0 \text{ kg}/\text{m}^2$ ). Trends and prevalence of  
28  
29  
30 188 overweight and obesity were estimated for each country. Place of residence was designated as  
31  
32 189 rural and urban according to country specific definitions; however, the present analyses were  
33  
34  
35 190 restricted to the urban sample only. This is based on the evidence that the bane of overweight  
36  
37 191 and obesity in Africa is more prevalent in the urban settings relative to other settings (10, 13).

38  
39  
40  
41 19242  
43  
44 193 **Analytical strategy**

45  
46  
47 194 We used STATA 13 to perform the data analyses. A data file was constructed by using place of  
48  
49 195 residence, country, survey year, and sample size. The analyses were conducted in three key  
50  
51  
52 196 steps. Initially, prevalence of overweight and obesity in selected countries in Africa with at least  
53  
54 197 three DHS data points was graphed. In this step, only point estimates were reported, and since  
55  
56  
57 198 point estimates are not affected by the complex survey design, the DHS weight for each survey

1  
2  
3 199 was used to get a reliable estimate. We then computed, at 95% confidence intervals (CI), the  
4  
5  
6 200 outcomes of interest by year of survey for each country in the second step. Because CIs are  
7  
8  
9 201 affected by the sampling design, we took into account the complex survey design (CSD) of DHS  
10  
11 202 within the *svyset* and *svy* procedures in STATA. To avoid flawed variances and biased  
12  
13 203 confidence intervals owing to the complex survey design, the analyses were conducted on the  
14  
15  
16 204 sub-sample with the full sample (urban+rural) maintained in the dataset. In STATA, this is  
17  
18 205 achieved with the “subpop” in *svy* procedures. In the third step, we examined statistical  
19  
20  
21 206 significance of the trends of overweight and obesity. To achieve this, we performed a  
22  
23 207 multinomial logistic regression with time (year of survey) as the key independent variable using  
24  
25  
26 208 BMI<25 kg/m<sup>2</sup> category as the base outcome and taking into account the CSD. While in steps 1  
27  
28 209 and 2 the time point data sets were treated independently, we pooled the data sets for trend  
29  
30  
31 210 analyses. As pooling the data may result in an overestimation of the statistical power,  
32  
33 211 normalized weight was used. To this end, the weight in the pooled data was divided by the  
34  
35  
36 212 number of surveys available for the respective countries.  
37  
38  
39 213  
40  
41  
42 214  
43  
44  
45 215  
46  
47  
48 216  
49  
50  
51  
52 217  
53  
54  
55 218  
56  
57  
58  
59  
60

219 **Results**

220 Table 1 presents results of the samples in the selected countries. Tables 2 and 3 present the  
 221 results of prevalence and trend analyses. Whereas Table 2 presents results for countries with  
 222 four or more data points, Table 3 presents results of countries with three data points. The  
 223 rationale for dividing the results tables into two categories is to ease interpretation of the  
 224 results for the reader. Figure 1 displays the results for all the 24 countries included in the study.

20 **Table 1: Results of samples used in the analysis**

| Country             |             |             |             |             |             |              |
|---------------------|-------------|-------------|-------------|-------------|-------------|--------------|
| <b>Ghana</b>        | <b>1993</b> | <b>1998</b> | <b>2003</b> | <b>2008</b> | <b>2014</b> | <b>Total</b> |
| <i>Samples</i>      | 583         | 656         | 966         | 2,023       | 2,130       | 6,358        |
| <b>Egypt</b>        | <b>1992</b> | <b>1995</b> | <b>2000</b> | <b>2005</b> | <b>2014</b> |              |
| <i>Samples</i>      | 3,090       | 3,779       | 4,279       | 4,595       | 5,842       | 21,555       |
| <b>Kenya</b>        | <b>1993</b> | <b>1998</b> | <b>2003</b> | <b>2008</b> | <b>2014</b> |              |
| <i>Samples</i>      | 623         | 500         | 1,398       | 1,342       | 6,369       | 10,232       |
| <b>Zambia</b>       | <b>1992</b> | <b>1996</b> | <b>2001</b> | <b>2007</b> | <b>2013</b> |              |
| <i>Samples</i>      | 2,329       | 2,099       | 1,591       | 1,867       | 4,636       | 12,522       |
| <b>Burkina Faso</b> | <b>1993</b> | <b>1998</b> | <b>2003</b> | <b>2010</b> | ---         |              |
| <i>Samples</i>      | 1,774       | 873         | 3,136       | 3,006       | ---         | 8,789        |
| <b>Benin</b>        | <b>1996</b> | <b>2001</b> | <b>2006</b> | <b>2011</b> | ---         |              |
| <i>Samples</i>      | 702         | 1,403       | 5,097       | 4,480       | ---         | 11,682       |
| <b>Mali</b>         | <b>1995</b> | <b>2001</b> | <b>2006</b> | <b>2011</b> | ---         |              |
| <i>Samples</i>      | 1,630       | 2,395       | 3,673       | 2,323       | ---         | 10,021       |
| <b>Malawi</b>       | <b>1992</b> | <b>2000</b> | <b>2004</b> | <b>2010</b> | ---         |              |
| <i>Samples</i>      | 999         | 1,864       | 1,022       | 1,801       | ---         | 5,686        |
| <b>Niger</b>        | <b>1992</b> | <b>1998</b> | <b>2006</b> | <b>2012</b> | ---         |              |
| <i>Samples</i>      | 2,253       | 1,069       | 2,267       | 2,453       | ---         | 8,042        |
| <b>Rwanda</b>       | <b>2000</b> | <b>2005</b> | <b>2010</b> | <b>2014</b> | ---         |              |
| <i>Samples</i>      | 1,528       | 1,524       | 1,112       | 1,604       | ---         | 5,768        |
| <b>Tanzania</b>     | <b>1991</b> | <b>1996</b> | <b>2004</b> | <b>2009</b> | ---         |              |

|    |                     |             |             |             |             |     |                |
|----|---------------------|-------------|-------------|-------------|-------------|-----|----------------|
| 1  |                     |             |             |             |             |     |                |
| 2  |                     |             |             |             |             |     |                |
| 3  |                     |             |             |             |             |     |                |
| 4  | Samples             | 1,128       | 1,247       | 1,336       | 1,404       | --- | 5115           |
| 5  |                     |             |             |             |             |     |                |
| 6  | <b>Uganda</b>       | <b>1995</b> | <b>2000</b> | <b>2006</b> | <b>2011</b> | --- |                |
| 7  |                     |             |             |             |             |     |                |
| 8  | Samples             | 1,462       | 1,510       | 826         | 1,539       | --- | 4,593          |
| 9  |                     |             |             |             |             |     |                |
| 10 | <b>Zimbabwe</b>     | <b>1994</b> | <b>1999</b> | <b>2005</b> | <b>2010</b> | --- |                |
| 11 |                     |             |             |             |             |     |                |
| 12 | Samples             | 508         | 1,685       | 1,298       | 1,500       | --- | 4,991          |
| 13 |                     |             |             |             |             |     |                |
| 14 | <b>Senegal</b>      | <b>1993</b> | <b>2005</b> | <b>2010</b> |             | --- |                |
| 15 |                     |             |             |             |             |     |                |
| 16 | Samples             | 1,683       | 3,180       | 3,373       |             | --- | 8,236          |
| 17 |                     |             |             |             |             |     |                |
| 18 | <b>Ivory Coast</b>  | <b>1994</b> | <b>1998</b> | <b>2011</b> |             | --- |                |
| 19 |                     |             |             |             |             |     |                |
| 20 | Samples             | 1,470       | 1,040       | 2,344       |             | --- | 4,854          |
| 21 |                     |             |             |             |             |     |                |
| 22 | <b>Cameroon</b>     | <b>1998</b> | <b>2004</b> | <b>2011</b> |             | --- |                |
| 23 |                     |             |             |             |             |     |                |
| 24 | Samples             | 838         | 2,819       | 4,161       |             | --- | 7,818          |
| 25 |                     |             |             |             |             |     |                |
| 26 | <b>Ethiopia</b>     | <b>2000</b> | <b>2005</b> | <b>2011</b> |             | --- |                |
| 27 |                     |             |             |             |             |     |                |
| 28 | Samples             | 1,550       | 1,299       | 1,817       |             | --- | 4,666          |
| 29 |                     |             |             |             |             |     |                |
| 30 | <b>Guinea</b>       | <b>1999</b> | <b>2005</b> | <b>2012</b> |             | --- |                |
| 31 |                     |             |             |             |             |     |                |
| 32 | Samples             | 1,415       | 1,263       | 1,818       |             | --- | 4,496          |
| 33 |                     |             |             |             |             |     |                |
| 34 | <b>Lesotho</b>      | <b>2004</b> | <b>2009</b> | <b>2014</b> |             | --- |                |
| 35 |                     |             |             |             |             |     |                |
| 36 | Samples             | 640         | 648         | 761         |             | --- | 2,049          |
| 37 |                     |             |             |             |             |     |                |
| 38 | <b>Madagascar</b>   | <b>1997</b> | <b>2003</b> | <b>2008</b> |             | --- |                |
| 39 |                     |             |             |             |             |     |                |
| 40 | Samples             | 722         | 2,708       | 2,079       |             | --- | 5,509          |
| 41 |                     |             |             |             |             |     |                |
| 42 | <b>Mozambique</b>   | <b>1997</b> | <b>2003</b> | <b>2011</b> |             | --- |                |
| 43 |                     |             |             |             |             |     |                |
| 44 | Samples             | 949         | 3,320       | 3,308       |             | --- | 7,577          |
| 45 |                     |             |             |             |             |     |                |
| 46 | <b>Nigeria</b>      | <b>2003</b> | <b>2008</b> | <b>2013</b> |             | --- |                |
| 47 |                     |             |             |             |             |     |                |
| 48 | Samples             | 1,831       | 6,659       | 8,976       |             | --- | 17,466         |
| 49 |                     |             |             |             |             |     |                |
| 50 | <b>Namibia</b>      | <b>1992</b> | <b>2006</b> | <b>2013</b> |             | --- |                |
| 51 |                     |             |             |             |             |     |                |
| 52 | Samples             | 1,090       | 1,854       | 2,142       |             | --- | 5,086          |
| 53 |                     |             |             |             |             |     |                |
| 54 | <b>Chad</b>         | <b>1996</b> | <b>2004</b> | <b>2014</b> |             | --- |                |
| 55 |                     |             |             |             |             |     |                |
| 56 | Samples             | 2,443       | 2,112       | 3,396       |             | --- | 7,951          |
| 57 | <b>Total sample</b> |             |             |             |             |     | <b>191,836</b> |

225

226 Table 2 provides period estimates and trends in overweight and obesity in 13 countries with 4  
 227 or more data points. These surveys cover periods between 14 years in Rwanda and 21 years in  
 228 Ghana, Kenya and Zambia. The earliest data points in these countries were in the 1990s and the  
 229 latest are after 2010. Across all 13 countries, levels of overweight reached or exceeded 20%  
 230 only in Egypt (36%) and Zimbabwe (28%) in the 1990s surveys. Obesity reached a double digit  
 231 of 10% or more only in Egypt (34%), and Zimbabwe (13%). In all the other countries,  
 232 overweight was under 20% and obesity was under 10%. In the latest surveys conducted since  
 233 2010 in these countries, overweight exceeded 20% in all countries except Burkina Faso and  
 234 Malawi where the prevalence was around 16%. The increase overtime was not also statistically  
 235 significant in these two countries. In 4 countries, the prevalence of overweight exceeded 30%  
 236 (Egypt (44%), Niger (32%), Rwanda (31%) and Ghana (30%)). Obesity exceeded 10% in all  
 237 countries in the 2010s surveys with Egypt (39%) and Ghana (22%) leading in levels of obesity.  
 238 Only in Burkina Faso was obesity still below 10% in the most recent survey.

**Table 2: Analysis of trends in overweight and obesity for countries with four or more data points**

| Country           |             |             |             |             |             |          |                        |
|-------------------|-------------|-------------|-------------|-------------|-------------|----------|------------------------|
| <b>Ghana</b>      | <b>1993</b> | <b>1998</b> | <b>2003</b> | <b>2008</b> | <b>2014</b> | <b>p</b> | <b>Nature of trend</b> |
| <i>Overweight</i> |             |             |             |             |             |          |                        |
| (%)               | 17.9        | 17.0        | 24.8        | 26.2        | 30.4        | p<.05    | ↗                      |
| (95% CI)          | 17.9, 18.2  | 13.6, 21.1  | 21.3, 28.7  | 24.2, 28.3  | 26.3, 34.9  |          |                        |
| <i>Obesity</i>    |             |             |             |             |             |          |                        |
| (%)               | 7.7         | 13.8        | 17.9        | 14.2        | 22.0        | p<.05    | ↗                      |
| (95% CI)          | 7.0, 8.5    | 10.6, 17.8  | 14.7, 21.5  | 12.7, 15.8  | 18.3, 26.3  |          |                        |
| <b>Egypt</b>      | <b>1995</b> | <b>2000</b> | <b>2005</b> | <b>2008</b> | <b>2014</b> |          |                        |
| <i>Overweight</i> |             |             |             |             |             |          |                        |
| (%)               | 35.5        | 35.0        | 40.6        | 39.1        | 44.2        | p<.05    | ↗                      |
| (95% CI)          | 32.9, 38.2  | 32.7, 37.3  | 38.2, 43.2  | 36.7, 41.6  | 42.0, 46.5  |          |                        |
| <i>Obesity</i>    |             |             |             |             |             |          |                        |
| (%)               | 34.2        | 29.6        | 39.1        | 41.2        | 39.2        | p<.05    | ↗                      |
| (95% CI)          | 31.0, 37.6  | 26.7, 32.7  | 36.4, 42.0  | 38.6, 43.9  | 36.6, 41.8  |          |                        |



1  
2  
3  
4  
5  
6  
7  
8  
9  
10  
11  
12  
13  
14  
15  
16  
17  
18  
19  
20  
21  
22  
23  
24  
25  
26  
27  
28  
29  
30  
31  
32  
33  
34  
35  
36  
37  
38  
39  
40  
41  
42  
43  
44  
45  
46  
47  
48  
49  
50  
51  
52  
53  
54  
55  
56  
57  
58  
59  
60

| <b>Kenya</b>        | <b>1993</b> | <b>1998</b> | <b>2003</b> | <b>2008</b> | <b>2014</b> |       |   |
|---------------------|-------------|-------------|-------------|-------------|-------------|-------|---|
| <i>Overweight</i>   |             |             |             |             |             |       |   |
| (%)                 | 19.5        | 19.0        | 26.6        | 27.5        | 28.9        | p<.05 | ↗ |
| (95% CI)            | 15.0, 24.9  | 15.4, 23.3  | 23.3, 30.3  | 22.8, 32.9  | 26.1, 31.9  |       |   |
| <b>Obesity</b>      |             |             |             |             |             |       |   |
| (%)                 | 6.4         | 5.1         | 10.7        | 10.5        | 15.0        | P<.05 | ↗ |
| (95% CI)            | 4.1, 9.8    | 3.3, 7.9    | 8.1, 14.1   | 7.7, 14.3   | 12.7, 17.6  |       |   |
| <b>Zambia</b>       | <b>1992</b> | <b>1996</b> | <b>2001</b> | <b>2007</b> | <b>2013</b> |       |   |
| <i>Overweight</i>   |             |             |             |             |             |       |   |
| (%)                 | 17.3        | 15.7        | 12.1        | 22.0        | 23.1        | p<.05 | ↗ |
| (95% CI)            | 15.2, 19.6  | 13.8, 17.9  | 10.3, 14.2  | 18.9, 25.4  | 21.2, 25.2  |       |   |
| <i>Obesity</i>      |             |             |             |             |             |       |   |
| (%)                 | 4.9         | 4.4         | 4.3         | 8.4         | 11.5        | p<.05 | ↗ |
| (95% CI)            | 3.8, 6.4    | 3.4, 5.7    | 3.2, 5.9    | 6.6, 10.5   | 9.8, 13.5   |       |   |
| <b>Burkina Faso</b> | <b>1993</b> | <b>1998</b> | <b>2003</b> | <b>2010</b> | ---         |       |   |
| <i>Overweight</i>   |             |             |             |             | ---         |       |   |
| (%)                 | 14.0        | 15.2        | 21.1        | 16.5        | ---         | p>.05 | → |
| (95% CI)            | 12.0, 16.3  | 12.2, 18.7  | 18.2, 24.3  | 13.8, 19.5  | ---         |       |   |
| <i>Obesity</i>      |             |             |             |             | ---         |       |   |
| (%)                 | 3.8         | 6.0         | 8.3         | 9.5         | ---         | p<.05 | ↗ |
| (95% CI)            | 2.7, 5.2    | 4.3, 8.4    | 5.7, 11.8   | 7.2, 12.3   | ---         |       |   |
| <b>Benin</b>        | <b>1996</b> | <b>2001</b> | <b>2006</b> | <b>2011</b> | ---         |       |   |
| <i>Overweight</i>   |             |             |             |             | ---         |       |   |
| (%)                 | 9.9         | 14.8        | 17.2        | 24.6        | ---         | p<.05 | ↗ |
| (95% CI)            | 7.3, 13.4   | 12.3, 17.6  | 15.5, 18.9  | 22.7, 26.7  | ---         |       |   |
| <i>Obesity</i>      |             |             |             |             | ---         |       |   |
| (%)                 | 4.7         | 9.1         | 8.3         | 10.5        | ---         | p<.05 | ↗ |
| (95% CI)            | 3.1, 7.0    | 7.4, 11.3   | 7.1, 9.7    | 8.9, 12.4   | ---         |       |   |
| <b>Mali</b>         | <b>1995</b> | <b>2001</b> | <b>2006</b> | <b>2011</b> | ---         |       |   |
| <i>Overweight</i>   |             |             |             |             | ---         |       |   |
| (%)                 | 14.9        | 21.6        | 21.0        | 22.5        | ---         | p<.05 | ↗ |
| (95% CI)            | 12.6, 17.4  | 18.4, 25.1  | 18.3, 23.9  | 19.1, 26.4  | ---         |       |   |
| <i>Obesity</i>      |             |             |             |             | ---         |       |   |

16

|    |                 |             |             |             |             |     |         |
|----|-----------------|-------------|-------------|-------------|-------------|-----|---------|
| 1  |                 |             |             |             |             |     |         |
| 2  |                 |             |             |             |             |     |         |
| 3  |                 |             |             |             |             |     |         |
| 4  | (%)             | 4.3         | 8.8         | 9.4         | 14.4        | --- | p<.05 ↗ |
| 5  |                 |             |             |             |             |     |         |
| 6  | (95% CI)        | 3.1, 5.8    | 6.9, 11.1   | 7.7, 11.4   | 11.7, 17.5  | --- |         |
| 7  |                 |             |             |             |             |     |         |
| 8  | <b>Malawi</b>   | <b>1992</b> | <b>2000</b> | <b>2004</b> | <b>2010</b> | --- |         |
| 9  |                 |             |             |             |             |     |         |
| 10 | Overweight      |             |             |             |             |     |         |
| 11 |                 |             |             |             |             |     |         |
| 12 | (%)             | 15.8        | 15.9        | 15.4        | 16.4        | --- | p>.05 → |
| 13 |                 |             |             |             |             |     |         |
| 14 | (95% CI)        | 12.3, 20.0  | 13.1, 19.1  | 12.1, 19.5  | 12.7, 21.1  | --- |         |
| 15 |                 |             |             |             |             |     |         |
| 16 | Obesity         |             |             |             |             |     |         |
| 17 |                 |             |             |             |             |     |         |
| 18 | (%)             | 4.1         | 3.2         | 4.3         | 12.1        | --- | P<.05 ↗ |
| 19 |                 |             |             |             |             |     |         |
| 20 | (95% CI)        | 2.6, 6.4    | 2.0, 5.1    | 2.8, 6.7    | 8.2, 17.5   | --- |         |
| 21 |                 |             |             |             |             |     |         |
| 22 | <b>Niger</b>    | <b>1992</b> | <b>1998</b> | <b>2006</b> | <b>2012</b> | --- |         |
| 23 |                 |             |             |             |             |     |         |
| 24 | Overweight      |             |             |             |             |     |         |
| 25 |                 |             |             |             |             |     |         |
| 26 | (%)             | 19.2        | 19.0        | 32.0        | 32.23       | --- | p<.05 ↗ |
| 27 |                 |             |             |             |             |     |         |
| 28 | (95% CI)        | 16.8, 22.0  | 15.5, 23.0  | 27.8, 36.6  | 28.5, 36.3  | --- |         |
| 29 |                 |             |             |             |             |     |         |
| 30 | Obesity         |             |             |             |             |     |         |
| 31 |                 |             |             |             |             |     |         |
| 32 | (%)             | 6.1         | 7.0         | 12.1        | 14.4        | --- | p<.05 ↗ |
| 33 |                 |             |             |             |             |     |         |
| 34 | (95% CI)        | 4.9, 7.6    | 5.2, 9.3    | 9.4, 15.4   | 11.7, 17.6  | --- |         |
| 35 |                 |             |             |             |             |     |         |
| 36 | <b>Rwanda</b>   | <b>2000</b> | <b>2005</b> | <b>2010</b> | <b>2014</b> | --- |         |
| 37 |                 |             |             |             |             |     |         |
| 38 | Overweight      |             |             |             |             |     |         |
| 39 |                 |             |             |             |             |     |         |
| 40 | (%)             | 24.4        | 14.4        | 23.3        | 31.1        | --- | p<.05 ↗ |
| 41 |                 |             |             |             |             |     |         |
| 42 | (95% CI)        | 23.1, 25.6  | 11.0, 18.8  | 19.4, 27.6  | 26.5, 36.1  | --- |         |
| 43 |                 |             |             |             |             |     |         |
| 44 | Obesity         |             |             |             |             |     |         |
| 45 |                 |             |             |             |             |     |         |
| 46 | (%)             | 6.8         | 4.5         | 7.5         | 12.6        | --- | p<.05 ↗ |
| 47 |                 |             |             |             |             |     |         |
| 48 | (95% CI)        | 6.1, 7.3    | 2.6, 7.8    | 4.9, 11.4   | 10.0, 15.7  | --- |         |
| 49 |                 |             |             |             |             |     |         |
| 50 | <b>Tanzania</b> | <b>1991</b> | <b>1996</b> | <b>2004</b> | <b>2009</b> | --- |         |
| 51 |                 |             |             |             |             |     |         |
| 52 | Overweight      |             |             |             |             |     |         |
| 53 |                 |             |             |             |             |     |         |
| 54 | (%)             | 14.1        | 20.5        | 18.9        | 21.0        | --- | p<.05 ↗ |
| 55 |                 |             |             |             |             |     |         |
| 56 | (95% CI)        | 11.1, 17.8  | 20.1, 20.9  | 18.5, 19.3  | 20.4, 22.2  | --- |         |
| 57 |                 |             |             |             |             |     |         |
| 58 | Obesity         |             |             |             |             |     |         |
| 59 |                 |             |             |             |             |     |         |
| 60 |                 |             |             |             |             |     |         |

16

1  
2  
3  
4  
5  
6  
7  
8  
9  
10  
11  
12  
13  
14  
15  
16  
17  
18  
19  
20  
21  
22  
23  
24  
25  
26  
27  
28  
29  
30  
31  
32  
33  
34  
35  
36  
37  
38  
39  
40  
41  
42  
43  
44  
45  
46  
47  
48  
49  
50  
51  
52  
53  
54  
55  
56  
57  
58  
59  
60

|                 |             |             |             |             |     |        |   |
|-----------------|-------------|-------------|-------------|-------------|-----|--------|---|
| (%)             | 3.6         | 7.8         | 9.7         | 11.8        | --- | p<.05  | ↗ |
| (95% CI)        | 2.4, 5.3    | 7.2, 7.9    | 9.4, 10.1   | 11.1, 12.1  | --- |        |   |
| <b>Uganda</b>   | <b>1995</b> | <b>2000</b> | <b>2006</b> | <b>2011</b> | --- |        |   |
| Overweight      |             |             |             |             | --- |        |   |
| (%)             | 14.1        | 22.7        | 23.7        | 25.4        | --- | p<.05  | ↗ |
| (95% CI)        | 11.1, 17.8  | 18.9, 26.9  | 16.9, 32.2  | 20.0, 31.7  | --- |        |   |
| Obesity         |             |             |             |             | --- |        |   |
| (%)             | 5.6         | 5.5         | 10.0        | 11.4        | --- | p<.05* | ↗ |
| (95% CI)        | 4.2, 7.6    | 4.0, 7.6    | 5.2, 18.3   | 7.8, 16.4   | --- |        |   |
| <b>Zimbabwe</b> | <b>1994</b> | <b>1999</b> | <b>2005</b> | <b>2010</b> | --- |        |   |
| Overweight      |             |             |             |             | --- |        |   |
| (%)             | 28.2        | 23.1        | 25.1        | 26.5        | --- | p>.05  | → |
| (95% CI)        | 23.3, 33.7  | 21.0, 25.4  | 22.0, 28.5  | 23.5, 29.7  | --- |        |   |
| Obesity         |             |             |             |             | --- |        |   |
| (%)             | 12.7        | 11.5        | 10.3        | 18.5        | --- | p>.05  | ↗ |
| (95% CI)        | 9.6, 16.7   | 10.0, 13.2  | 8.6, 12.4   | 15.5, 21.9  | --- |        |   |

↗ = increasing); ↘ = decreasing; → = stable; CI = confidence interval; p = significance level

239

240 Table 3 shows the results for the 11 countries with only three data points. The periods covered

241 by these surveys range from 10 years in Lesotho and Nigeria to 17 years in Senegal and Ivory

242 Coast. Some of the earliest surveys in these countries occurred in the 2000s and given

243 differences in timing and duration between the earliest and latest surveys, it made sense to

244 report these surveys separately. Lesotho has the highest prevalence of overweight, which

245 stood at 32% in 2004 and has barely changed over the subsequent 10-year period. Namibia and

246 Cameroon also had high levels of overweight at more than 20%. On the other hand,

247 Madagascar and Ethiopia had the lowest levels of overweight and obesity. In Madagascar and  
 248 Ethiopia, overweight is varied between 7 and 12% over the period covered by the surveys,  
 249 while obesity is under 5% (under 2% in Madagascar). The change of overweight overtimes was  
 250 statistically significant only in Guinea, Mozambique, Namibia and Chad, while obesity was  
 251 significant only in Senegal, Guinea and Cameroon.

**Table 3: Analysis of trends in overweight and obesity for countries with three data points**

| Country            |             |             |             | <i>p</i>      | Nature of trend |
|--------------------|-------------|-------------|-------------|---------------|-----------------|
| <b>Senegal</b>     | <b>1993</b> | <b>2005</b> | <b>2010</b> |               |                 |
| Overweight         |             |             |             |               |                 |
| (%)                | 18.8        | 21.9        | 21.6        | <i>p</i> >.05 | →               |
| (95% CI)           | 16.3, 21.6  | 17.0, 27.6  | 18.2, 25.4  |               |                 |
| Obesity            |             |             |             |               |                 |
| (%)                | 8.5         | 12.8        | 15.2        | <i>p</i> <.05 | ↗               |
| (95% CI)           | 6.7, 10.8   | 9.5, 17.1   | 11.9, 19.3  |               |                 |
| <b>Ivory Coast</b> | <b>1994</b> | <b>1998</b> | <b>2011</b> |               |                 |
| Overweight         |             |             |             |               |                 |
| (%)                | 18.4        | 18.8        | 24.9        | <i>p</i> >.05 | →               |
| (95% CI)           | 16.1, 20.8  | 16.1, 21.7  | 21.4, 28.8  |               |                 |
| Obesity            |             |             |             |               |                 |
| (%)                | 6.9         | 9.0         | 11.8        | <i>p</i> >.05 | →               |
| (95% CI)           | 5.1, 9.2    | 7.1, 11.4   | 9.1, 15.1   |               |                 |
| <b>Cameroon</b>    | <b>1998</b> | <b>2004</b> | <b>2011</b> |               |                 |
| Overweight         |             |             |             |               |                 |
| (%)                | 24.7        | 27.0        | 26.7        | <i>p</i> >.05 | →               |
| (95% CI)           | 21.3, 28.3  | 23.8, 30.5  | 23.9, 29.3  |               |                 |
| Obesity            |             |             |             |               |                 |
| (%)                | 9.3         | 10.9        | 16.1        | <i>p</i> >.05 | ↗               |
| (95% CI)           | 6.7, 12.8   | 8.9, 13.4   | 14.1, 18.4  |               |                 |
| <b>Ethiopia</b>    | <b>2000</b> | <b>2005</b> | <b>2011</b> |               |                 |
| Overweight         |             |             |             |               |                 |
| (%)                | 9.5         | 11.7        | 12.5        | <i>p</i> >.05 | →               |
| (95% CI)           | 6.9, 12.9   | 7.5, 18.0   | 9.2, 16.8   |               |                 |
| Obesity            |             |             |             |               |                 |
| (%)                | 1.0         | 2.9         | 3.6         | <i>p</i> <.05 | ↗               |
| (95% CI)           | 0.5, 1.7    | 1.5, 5.8    | 2.3, 5.4    |               |                 |
| <b>Guinea</b>      | <b>1999</b> | <b>2005</b> | <b>2012</b> |               |                 |
| Overweight         |             |             |             |               |                 |
| (%)                | 18.2        | 17.8        | 25.4        | <i>p</i> <.05 | ↗               |

|    |                   |             |             |             |       |   |
|----|-------------------|-------------|-------------|-------------|-------|---|
| 1  |                   |             |             |             |       |   |
| 2  |                   |             |             |             |       |   |
| 3  |                   |             |             |             |       |   |
| 4  | (95% CI)          | 15.7, 21.0  | 14.3, 22.0  | 20.9, 30.4  |       |   |
| 5  | Obesity           |             |             |             |       |   |
| 6  | (%)               | 6.2         | 7.9         | 9.4         | p<.05 | ↗ |
| 7  | (95% CI)          | 4.8, 7.9    | 4.6, 13.3   | 6.9, 12.8   |       |   |
| 8  | <b>Lesotho</b>    | <b>2004</b> | <b>2009</b> | <b>2014</b> |       |   |
| 9  | Overweight        |             |             |             |       |   |
| 10 | (%)               | 32.0        | 30.0        | 29.7        | p>.05 | → |
| 11 | (95% CI)          | 25.3, 39.5  | 23.3, 37.7  | 22.9, 37.4  |       |   |
| 12 | Obesity           |             |             |             |       |   |
| 13 | (%)               | 21.9        | 25.8        | 20.3        | p>.05 | → |
| 14 | (95% CI)          | 15.5, 30.0  | 20.1, 32.4  | 14.7, 27.4  |       |   |
| 15 | <b>Madagascar</b> | <b>1997</b> | <b>2003</b> | <b>2008</b> |       |   |
| 16 | Overweight        |             |             |             |       |   |
| 17 | (%)               | 7.3         | 8.3         | 10.5        | p>.05 | → |
| 18 | (95% CI)          | 5.2, 10.1   | 6.6, 10.5   | 8.1, 13.5   |       |   |
| 19 | Obesity           |             |             |             |       |   |
| 20 | (%)               | 1.1         | 3.4         | 1.9         | p>.05 | → |
| 21 | (95% CI)          | 0.5, 2.6    | 2.4, 4.8    | 1.0, 3.5    |       |   |
| 22 | <b>Mozambique</b> | <b>1997</b> | <b>2003</b> | <b>2011</b> |       |   |
| 23 | Overweight        |             |             |             |       |   |
| 24 | (%)               | 11.1        | 15.1        | 16.0        | p<.05 | ↗ |
| 25 | (95% CI)          | 8.4, 14.6   | 13.1, 19.1  | 14.1, 18.2  |       |   |
| 26 | Obesity           |             |             |             |       |   |
| 27 | (%)               | 4.0         | 3.2         | 6.3         | p>.05 | → |
| 28 | (95% CI)          | 2.3, 6.9    | 2.0, 5.1    | 4.7, 8.6    |       |   |
| 29 | <b>Nigeria</b>    | <b>2003</b> | <b>2008</b> | <b>2013</b> |       |   |
| 30 | Overweight        |             |             |             |       |   |
| 31 | (%)               | 19.7        | 24.3        | 25.2        | p>.05 | → |
| 32 | (95% CI)          | 15.2, 25.1  | 22.6, 26.1  | 23.4, 27.1  |       |   |
| 33 | Obesity           |             |             |             |       |   |
| 34 | (%)               | 11.5        | 11.0        | 11.5        | p>.05 | → |
| 35 | (95% CI)          | 8.3, 15.6   | 9.7, 12.5   | 10.3, 12.7  |       |   |
| 36 | <b>Namibia</b>    | <b>1992</b> | <b>2006</b> | <b>2013</b> |       |   |
| 37 | Overweight        |             |             |             |       |   |
| 38 | (%)               | 21.4        | 22.6        | 21.5        | p>.05 | → |
| 39 | (95% CI)          | 17.9, 25.4  | 19.2, 26.5  | 18.0, 25.4  |       |   |
| 40 | Obesity           |             |             |             |       |   |
| 41 | (%)               | 12.7        | 18.9        | 18.6        | p<.05 | ↗ |
| 42 | (95% CI)          | 10.3, 15.6  | 16.1, 22.1  | 15.2, 22.5  |       |   |
| 43 | <b>Chad</b>       | <b>1996</b> | <b>2004</b> | <b>2014</b> |       |   |
| 44 | Overweight        |             |             |             |       |   |
| 45 | (%)               | 10.4        | 14.9        | 16.6        | p<.05 | ↗ |
| 46 | (95% CI)          | 9.6, 11.4   | 12.4, 17.7  | 13.9, 19.6  |       |   |
| 47 | Obesity           |             |             |             |       |   |
| 48 | (%)               |             |             |             |       |   |
| 49 | (95% CI)          |             |             |             |       |   |
| 50 |                   |             |             |             |       |   |
| 51 |                   |             |             |             |       |   |
| 52 |                   |             |             |             |       |   |
| 53 |                   |             |             |             |       |   |
| 54 |                   |             |             |             |       |   |
| 55 |                   |             |             |             |       |   |
| 56 |                   |             |             |             |       |   |
| 57 |                   |             |             |             |       |   |
| 58 |                   |             |             |             |       |   |
| 59 |                   |             |             |             |       |   |
| 60 |                   |             |             |             |       |   |

20

|          |         |          |          |       |   |
|----------|---------|----------|----------|-------|---|
| (%)      | 3.8     | 5.7      | 6.5      | p<.05 | ↗ |
| (95% CI) | 2.9,4.1 | 3.9, 8.4 | 4.8, 8.7 |       |   |

↗ = increasing); ↘ = decreasing; → = stable; CI = confidence interval; p = significance level

252

253 The Figure 1 below depicts the increasing trends of overweight and obesity in all the 24  
 254 countries included in the analysis, except in Lesotho where there is semblance of a decrease.

255

256 **Figure 1: Time trends of overweight and obesity**

257

258

259

260

261 **Countries:** BF= Burkina Faso; BJ= Benin; CI=Ivory Coast; CM= Cameroon; EG= Egypt; ET=Ethiopia; GH= Ghana; GN=  
 262 Guinea; KE= Kenya; LS= Lesotho; MD= Madagascar; ML= Mali; MW= Malawi; MZ= Mozambique; NG= Nigeria; NI=  
 263 Niger; NM= Namibia; RW= Rwanda; SN= Senegal; TD = Chad; TZ= Tanzania; UG= Uganda; ZM=Zambia; ZW=  
 264 Zimbabwe

265

266

267

268

269

20

1  
2  
3 270 **Discussion**  
4  
5

6  
7 271 We set out to investigate the prevalence and time trends in overweight and obesity between  
8  
9 272 1991 and 2014 in 24 African countries. Primarily, we confirm that the prevalence of overweight  
10  
11 273 and obesity among urban women has rapidly increased in the past two and a half decades. All  
12  
13 274 24 countries included in our analyses experienced an increase in overweight and obesity over  
14  
15 275 the time period under consideration. However, the increase was only statistically significant in  
16  
17 276 17 of the 24 countries in the case of obesity and 13 out of the 24 for overweight. The changes  
18  
19 277 over time were particularly noticeable among countries with 4 or more survey data points, in  
20  
21 278 which case, all the 13 countries showed a statistically significant increase in obesity, while 10  
22  
23 279 showed significant increase for overweight during the period of the study. For countries with  
24  
25 280 three data points, only 4 of the 11 countries had a significant increase for overweight and 3 for  
26  
27 281 obesity. This suggests that length of time plays an important role in understanding the changes  
28  
29 282 in overweight and obesity over time. We also found that 18 of the 24 countries had an  
30  
31 283 overweight prevalence above 20%, based on the most recent survey waves for the respective  
32  
33 284 countries. This was not the case in the earlier surveys where only 6 countries had an overweight  
34  
35 285 prevalence of 20% or above. Four countries of the 24 had an obesity prevalence that was  
36  
37 286 above 20%, with the prevalence in the rest ranging between 10% and 19% based on the latest  
38  
39 287 surveys. However, in the earlier surveys, only one country had obesity prevalence of 20% or  
40  
41 288 more, while the rest had obesity rate ranging from 1 to 12%. This points to worsening  
42  
43 289 phenomenon of obesity among urban women in the past two and half decades. Another key  
44  
45 290 finding is that in most of the countries included in our analyses, obesity increased alongside  
46  
47 291 overweight, suggesting that urban women who are overweight have a greater probability of  
48  
49  
50  
51  
52  
53  
54  
55  
56  
57  
58  
59  
60

1  
2  
3 292 progressing to obesity. Thus, addressing overweight will, to a larger extent curtail the  
4  
5  
6 293 increasing incidence of obesity in urban Africa.  
7  
8  
9 294  
10  
11  
12 295 Focusing on individual countries, we found significant differences in overweight and obesity  
13  
14 296 across the countries included in the analysis. For example, in the most recent surveys, Egypt has  
15  
16  
17 297 the highest prevalence of overweight (44%) and obesity (39%) by far, followed by Ghana with  
18  
19  
20 298 an overweight prevalence of 30% and obesity of 22%. Niger (32%) and Rwanda (31%) were two  
21  
22 299 other countries with overweight prevalence of 30% and above. The results on Egypt are not  
23  
24 300 surprising as the country was previously ranked among the countries in the world with the most  
25  
26  
27 301 obese people (27). The results in Ghana are also consistent with previous findings (28). Egypt  
28  
29 302 and Ghana also experienced a significant increase in overweight and obesity in the past two and  
30  
31  
32 303 half decades. Obesity increased by 65% (7.7% to 22%) in Ghana and by 12% (34% to 39%) in  
33  
34 304 Egypt. Similarly, increase in obesity doubled in Kenya, Benin, Niger, Rwanda, Ivory Coast and  
35  
36  
37 305 Uganda, while tripled in Zambia, Burkina Faso, Mali, Malawi and Tanzania. Thus, while the  
38  
39 306 prevalence of obesity in the aforementioned countries may be considered lower than that of  
40  
41  
42 307 Egypt and Ghana, the increment overtime has been doubling or tripling in rates. This suggests  
43  
44 308 that in the next decades, the obesity rates in these countries may catch up with Egypt and  
45  
46  
47 309 Ghana, which are currently leading in terms of the level of prevalence of both overweight and  
48  
49  
50 310 obesity. However, overweight and obesity did not show any significant changes overtime in  
51  
52  
53 311 Cameroon, Lesotho, Madagascar and Nigeria. Ethiopia and Madagascar had the lowest  
54  
55 312 prevalence of both obesity and overweight. Similar findings were obtained in Ethiopia and  
56  
57  
58 313 Madagascar in a recent study using the DHS data from 32 African countries (21).  
59  
60



1  
2  
3 314  
4  
5  
6  
7 315 The increasing prevalence and trends of overweight and obesity in Africa is attributed largely to  
8  
9 316 rapid urbanization taking place in the continent and its associated nutritional transition. For  
10  
11 317 example, in 2010, the share of the African urban population was about 36% and is projected to  
12  
13 318 increase to 50% and 60% by 2030 and 2050 respectively (29). Using Ghana as a case in point,  
14  
15 319 for the first time, the Ghana Population and Housing Census shows that a little over half (50.9%)  
16  
17 320 of country's population live in urban areas compared to rural areas (30). The growing  
18  
19 321 urbanization comes along with lifestyle changes such as decreased physical activity and  
20  
21 322 increase supply of high caloric fast foods and sugar sweetened beverages (31-34). Indeed,  
22  
23 323 sedentary lifestyle and high consumption of energy dense diets are found to account for the  
24  
25 324 increasing burden of overweight and obesity in urban settings of the low and middle income  
26  
27 325 countries (LMIC) (13-15). The consequences of which, is increase in non-communicable  
28  
29 326 diseases (NCDs), as there is substantial evidence that the risk of NCDs such as coronary heart  
30  
31 327 disease, ischemic stroke and type 2 diabetes mellitus increases steadily with increasing body  
32  
33 328 mass index (BMI) (3, 4, 34). In addition, an increased burden of disability-adjusted life years  
34  
35 329 (DALYs) is associated with overweight and obesity (3). It is imperative that strategies be  
36  
37 330 implemented to address the problem of overweight and obesity, thereby curbing associated  
38  
39 331 NCD risk in urban Africa. Addressing the issue of overweight and obesity will be an important  
40  
41 332 step towards curbing the surge of NCDs the continent is currently experiencing, which is likely  
42  
43 333 to surpass the toll of sickness and death from infectious diseases by 2030 (35). This will further  
44  
45 334 contribute greatly to the potential for African countries to achieve Sustainable Development  
46  
47 335 Goals (SDG 3.4): reducing by one third premature mortality from non-communicable diseases  
48  
49  
50  
51  
52  
53  
54  
55  
56  
57  
58  
59  
60

1  
2  
3 336 through prevention, and treatment, and promote mental health and wellbeing by 2030 (36). In  
4  
5  
6 337 the light of the findings of our study and literature discussed above, we particularly advocate  
7  
8  
9 338 for interventions to address increasing sedentary lifestyles and poor eating behaviour among  
10  
11 339 urban dwelling women, as this will go a long way in reducing the incidence of overweight and  
12  
13 340 obesity in these settings.  
14  
15  
16  
17 341

### 20 342 **Strengths and limitations**

21  
22  
23 343 The key strength of this study is the use of nationally representative data sets, thereby  
24  
25 344 providing more robust estimates of the prevalence and trends of overweight and obesity in the  
26  
27  
28 345 respective countries. Further, height and weight as used in the calculation of BMI, was  
29  
30 346 objectively measured by well-trained technicians, reducing possible misclassification of  
31  
32  
33 347 overweight and obesity. The study is also associated with some limitations. To maintain sample  
34  
35 348 comparability over time, we had to limit our sample to women with children under 5 years old.  
36  
37  
38 349 This may, to some extent, affect the generalizability of the findings, as the sample may not be  
39  
40 350 representative of the entire female population. Another limitation is the cross-sectional nature  
41  
42  
43 351 of the data, which makes it impossible to ascertain the changes in BMI over time. Lack of  
44  
45 352 uniformity in the definition of urban and rural settings may also affect the generalizability of the  
46  
47  
48 353 findings across countries, since different countries have different definitions of what constitutes  
49  
50 354 urban versus rural. Lastly, one methodological limitation is that we pooled the data to perform  
51  
52  
53 355 the trend analysis, which may lead to an overestimation of statistical power. To address this  
54  
55  
56  
57  
58  
59  
60

1  
2  
3 356 limitation, the weight in the pooled data was divided by the number of surveys available for the  
4  
5  
6 357 country.

7  
8  
9 358

10  
11  
12 359 **Conclusions**

13  
14  
15 360 The study provided clear evidence of increase in overweight and obesity among women in the  
16  
17 361 urban settings of all the countries included in the analysis, with the increase overtime being  
18  
19 362 statistically significant in 17 of the 24 countries in the case of obesity and 13 out of the 24 for  
20  
21 363 overweight. We have supported the finding that urbanization is associated with increased  
22  
23 364 prevalence of overweight and obesity among women. The prevalence of obesity increased  
24  
25 365 more than two fold in most countries and more than three fold in others. The prevalence of  
26  
27 366 obesity also increased alongside overweight, suggesting that urban women who were  
28  
29 367 overweight were likely to progress to obesity status with time. These findings call for deliberate  
30  
31 368 strategies and interventions by policy makers, politicians and health promotion experts to  
32  
33 369 encourage active lifestyles and healthy eating behaviour to curb the growing proportion of  
34  
35 370 unhealthy weight women of child bearing age in urban Africa.

36  
37  
38  
39  
40  
41  
42  
43 371 **Acknowledgements**

44  
45  
46 372 We wish to express our profound gratitude to The DHS Program, USA for providing us access to  
47  
48 373 the data. We also wish to acknowledge institutions of respective countries that played critical  
49  
50 374 roles in the data collection process.

51  
52  
53  
54  
55 375

1  
2  
3 376 **Competing Interest**  
4  
5

6 377 The authors have no competing interests to declare.  
7  
8

9  
10 378 **Funding**  
11

12  
13 379 This study did not receive funding from any source.  
14

15  
16 380 **Data Sharing Statement**  
17

18  
19 381 This study was a re-analysis of existing data that are publicly available from The DHS Program at  
20  
21 382 <http://dhsprogram.com/publications/publication-fr221-dhs-final-reports.cfm>. Data are  
22  
23  
24 383 accessible free of charge upon a registration with the Demographic and Health Survey program  
25  
26  
27 384 (The DHS Program). The registration is done on the DHS website indicated above.  
28

29  
30 385 **Authors' Contribution**  
31

32  
33 386 DAA conceived and designed the study, interpreted the results, wrote the first draft of the  
34  
35  
36 387 manuscript, and contributed to revision of the manuscript. DAA and ZTD analysed the data. ZTD  
37  
38 388 contributed to the drafting of the analytical strategy. ZTD, SM BM and ACE contributed to  
39  
40  
41 389 study design, data interpretation, and critical revision of the manuscript. All authors take  
42  
43 390 responsibility of any issues that might arise from the publication of this manuscript.  
44  
45

46 391  
47

48  
49 392  
50

51  
52 393  
53

54 394  
55

56  
57 395  
58  
59  
60

396 **References**

- 397
- 398 1. Wang Y, Chen HJ, Shaikh S, Mathur P. Is obesity becoming a public health problem in India?  
399 Examine the shift from under- to overnutrition problems over time *Obes Rev* 2009;10(4):456-74.
  - 400 2. Martorell R, Khan LK, Hughes ML, Grummer-Strawn LM. Obesity in women from developing  
401 countries. *Eur J Clin Nutr*. 2000;54.
  - 402 3. World Health Organization. Obesity. Situation and trends: Global Health Observatory (GHO) data  
403 2016 [cited 2017 01.02]. Available from: [http://www.who.int/gho/ncd/risk\\_factors/obesity\\_text/en/](http://www.who.int/gho/ncd/risk_factors/obesity_text/en/).
  - 404 4. Mokdad AH, Ford ES, Bowman BA et al. Prevalence of obesity, diabetes, and obesity-related  
405 health risk factors *JAMA*. 2003;289(1):76-9.
  - 406 5. PubMed Health. Excess body fat now linked to 13 different types of cancer: PubMed Health;  
407 [cited 2017 02.02]. Available from:  
408 [https://www.ncbi.nlm.nih.gov/pubmedhealth/behindtheheadlines/news/2016-08-25-excess-body-fat-  
409 now-linked-to-13-different-types-of-cancer/](https://www.ncbi.nlm.nih.gov/pubmedhealth/behindtheheadlines/news/2016-08-25-excess-body-fat-now-linked-to-13-different-types-of-cancer/).
  - 410 6. World Health Organization (WHO). Mean Body Mass Index (BMI): WHO; 2017 [cited 2017  
411 03.02]. Available from: [http://www.who.int/gho/ncd/risk\\_factors/bmi\\_text/en/](http://www.who.int/gho/ncd/risk_factors/bmi_text/en/).
  - 412 7. Mendez MA, Monteiro CA, Popkin BM. Overweight exceeds underweight among women in  
413 most developing countries *Am J Clin Nutr*. 2005;81(3):714-21.
  - 414 8. Kinnunen TI, Neupane S. Prevalence of overweight among women of childbearing age in Nepal:  
415 trends from 2001 to 2011 and associations with socio-demographic factors *Matern Child Health J*.  
416 2014;18(8):1846-53.
  - 417 9. Razak F, Corsi DJ, Slutsky AS, Kurpad A, Berkman L, Laupacis A, et al. Prevalence of Body Mass  
418 Index Lower Than 16 Among Women in Low- and Middle-Income Countries *JAMA*. 2015;314(20):2164-  
419 71.
  - 420 10. Neuman M, Kawachi I, Gortmaker S, Subramanian SV. Urban-rural differences in BMI in low- and  
421 middle-income countries: the role of socioeconomic status *Am J Clin Nutr*. 2013;97(2):428-36.
  - 422 11. Yadav K, Krishnan A. Changing patterns of diet, physical activity and obesity among urban, rural  
423 and slum populations in north India *Obes Rev* 2008;9(5):400-8.
  - 424 12. World Health Organization. Obesity and overweight 2016 [cited 2017 03.04]. Available from:  
425 <http://www.who.int/mediacentre/factsheets/fs311/en/>.
  - 426 13. Ziraba AK, Fotso JC, Ochako R. Overweight and obesity in urban Africa: A problem of the rich or  
427 the poor? . *BMC Public Health*. 2009;9(1):1-9.
  - 428 14. Abrha S, Shiferaw S, Ahmed KY. Overweight and obesity and its socio-demographic correlates  
429 among urban Ethiopian women: evidence from the 2011 EDHS *BMC Public Health*. 2016;636.
  - 430 15. Tebekaw Y, Teller C, Colón-Ramos U. The burden of underweight and overweight among women  
431 in Addis Ababa, Ethiopia *BMC Public Health* 2014;14:1126.
  - 432 16. Subramanian SV, Perkins JM, Özaltin E, Davey Smith G. Weight of nations: a socioeconomic  
433 analysis of women in low- to middle-income countries *Am J Clin Nutr*. 2011;93(2):413-21.
  - 434 17. Monteiro CA, Conde WL, Lu B ea. Obesity and inequities in health in the developing world *Int J*  
435 *Obes Relat Metab Disord*. 2004;28(9):1181-6.
  - 436 18. Jones-Smith JC, Gordon-Larsen P, Siddiqi A, Popkin BM. Is the burden of overweight shifting to  
437 the poor across the globe? Time trends among women in 39 low- and middle-income countries (1991-  
438 2008). *Int J Obes* 2012;36(8):1114-20.
  - 439 19. Kimani-Murage EW, Muthuri SK, Oti SO, Mutua MK, van de Vijver S, Kyobutungi C. Evidence of a  
440 Double Burden of Malnutrition in Urban Poor Settings in Nairobi, Kenya *PLoS ONE*. 2015;10(6).

- 1  
2  
3 441 20. Adeboye B, Bermanno G, Rolland C. Obesity and its health impact in Africa: a systematic review.  
4 442 Cardiovasc J Afr. 2012;23(9):512-21.
- 5 443 21. Neupane S, Prakash KC, Doku DT. Overweight and obesity among women: analysis of  
6 444 demographic and health survey data from 32 Sub-Saharan African Countries BMC Public Health.  
7 445 2016;16:30.
- 8 446 22. The DHS Program. Demographic and Health Surveys [cited 2017 02.02]. Available from:  
9 447 [https://dhsprogram.com/data/dataset\\_admin/download-datasets.cfm](https://dhsprogram.com/data/dataset_admin/download-datasets.cfm).
- 10 448 23. The DHS Program. DHS Methodology [cited 2017 02.02]. Available from:  
11 449 <http://dhsprogram.com/What-We-Do/Survey-Types/DHS-Methodology.cfm>.
- 12 450 24. Shireen A, Kothari MT, Pullum T. An Assessment of the Quality of DHS Anthropometric Data,  
13 451 2005-2014. DHS Methodological Reports No. 16 Rockville, Maryland, USA: ICF International, 2015.
- 14 452 25. Eknoyan G. Adolphe Quetelet (1796 –1874) - the average man and indices of obesity . Nephrol  
15 453 Dial Transplant 2008;23:47-51.
- 16 454 26. World Health Organization. BMI classification: WHO; 2006 [cited 2017 02.02]. Available from:  
17 455 [http://apps.who.int/bmi/index.jsp?introPage=intro\\_3.html](http://apps.who.int/bmi/index.jsp?introPage=intro_3.html).
- 18 456 27. Murray CTL, Ng M. Nearly one-third of the world's population is obese or overweight, new data  
19 457 show 2016 [cited 2017 3.4]. Available from: [http://www.healthdata.org/news-release/nearly-one-third-](http://www.healthdata.org/news-release/nearly-one-third-world%E2%80%99s-population-obese-or-overweight-new-data-show)  
20 458 [world%E2%80%99s-population-obese-or-overweight-new-data-show](http://www.healthdata.org/news-release/nearly-one-third-world%E2%80%99s-population-obese-or-overweight-new-data-show).
- 21 459 28. Ofori-Asenso R, Agyeman AA, Laar A, Boateng D. Overweight and obesity epidemic in Ghana-a  
22 460 systematic review and meta-analysis BMC Public Health. 2016;16(1):1239.
- 23 461 29. African Development Bank. Urbanization in Africa 2012 [cited 2017 5.4]. Available from:  
24 462 [https://www.afdb.org/en/blogs/afdb-championing-inclusive-growth-across-africa/post/urbanization-in-](https://www.afdb.org/en/blogs/afdb-championing-inclusive-growth-across-africa/post/urbanization-in-africa-10143/)  
25 463 [africa-10143/](https://www.afdb.org/en/blogs/afdb-championing-inclusive-growth-across-africa/post/urbanization-in-africa-10143/).
- 26 464 30. Ghana Statistical Service (GHS). Population and housing census: summary report of final results.  
27 465 Accra: GHS, 2012.
- 28 466 31. Duda RB, Dark R, Seffah J, Adanu RMK, Anarfi JK, Hill AG. Prevalence of Obesity in Women of  
29 467 Accra, Ghana Afr J Health Sci 2007;14:154-59.
- 30 468 32. Popkin BM, Adair LS, Ng SW. Global nutrition transition and the pandemic of obesity in  
31 469 developing countries Nutr Rev 2012;70(1):3-21.
- 32 470 33. Abubakari AR, Lauder W, Jones MC, Kirk A, Agyemang C, Bhopal RS. Prevalence and time trends  
33 471 in diabetes and physical inactivity among adult West African populations: the epidemic has arrived  
34 472 Public Health. 2009;123(9):602-14.
- 35 473 34. Mohan V, Mathur P, Deepa R, Deepa M, Shukla DK, Menon GR, et al. Urban rural differences in  
36 474 prevalence of self-reported diabetes in India--the WHO-ICMR Indian NCD risk factor surveillance  
37 475 Diabetes Res Clin Pract 2008;80(1):159-68.
- 38 476 35. Organization WH. Research shows higher risk of developing Non-communicable diseases in  
39 477 Africa: WHO; 2016 [cited 2017 16.02]. Available from: [http://www.afro.who.int/en/media-](http://www.afro.who.int/en/media-centre/pressreleases/item/9285-research-shows-higher-risk-of-developing-non-communicable-diseases-in-africa.html)  
40 478 [centre/pressreleases/item/9285-research-shows-higher-risk-of-developing-non-communicable-](http://www.afro.who.int/en/media-centre/pressreleases/item/9285-research-shows-higher-risk-of-developing-non-communicable-diseases-in-africa.html)  
41 479 [diseases-in-africa.html](http://www.afro.who.int/en/media-centre/pressreleases/item/9285-research-shows-higher-risk-of-developing-non-communicable-diseases-in-africa.html).
- 42 480 36. United Nations. Resolution adopted by the General Assembly on 25 September 2015--  
43 481 Transforming our world: the 2030 Agenda for Sustainable Development 2015 [cited 2017 16.02].  
44 482 Available from: [http://www.un.org/ga/search/view\\_doc.asp?symbol=A/RES/70/1&Lang=E](http://www.un.org/ga/search/view_doc.asp?symbol=A/RES/70/1&Lang=E).

483

1  
2  
3  
4  
5  
6  
7  
8  
9  
10  
11  
12  
13  
14  
15  
16  
17  
18  
19  
20  
21  
22  
23  
24  
25  
26  
27  
28  
29  
30  
31  
32  
33  
34  
35  
36  
37  
38  
39  
40  
41  
42  
43  
44  
45  
46  
47  
48  
49  
50  
51  
52  
53  
54  
55  
56  
57  
58  
59  
60

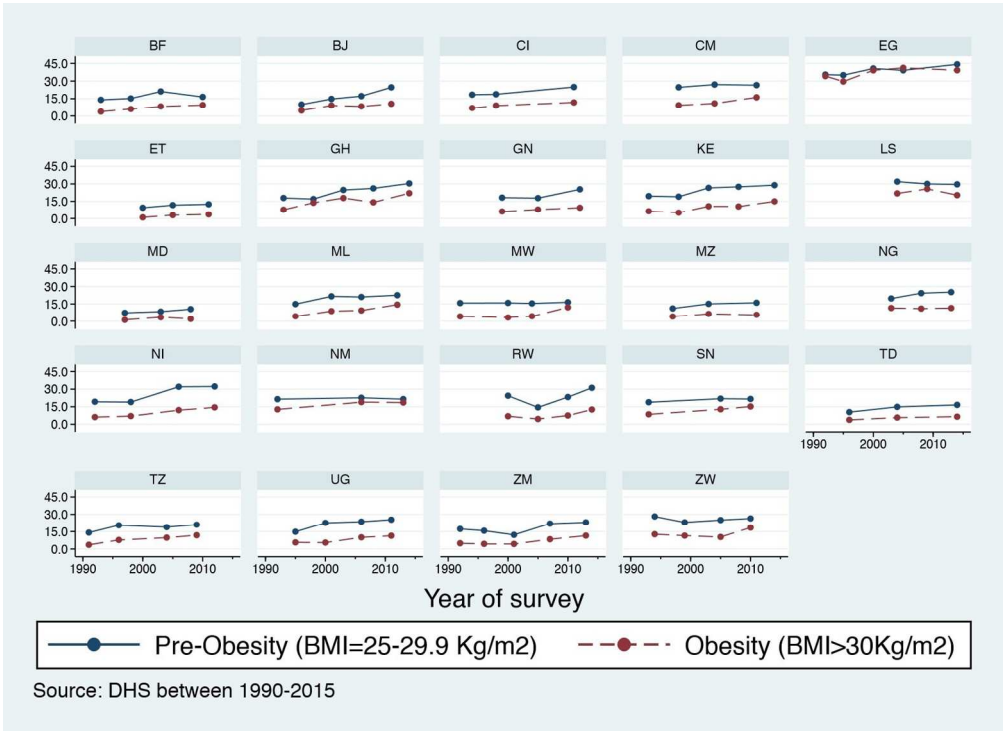

139x101mm (300 x 300 DPI)

Review only

**STROBE 2007 (v4) checklist of items to be included in reports of observational studies in epidemiology\***  
**Checklist for cohort, case-control, and cross-sectional studies (combined)**

| Section/Topic             | Item # | Recommendation                                                                                                                                                                                                                                                                                                                                                                                                                                                         | Reported on page # |
|---------------------------|--------|------------------------------------------------------------------------------------------------------------------------------------------------------------------------------------------------------------------------------------------------------------------------------------------------------------------------------------------------------------------------------------------------------------------------------------------------------------------------|--------------------|
| Title and abstract        | 1      | (a) Indicate the study's design with a commonly used term in the title or the abstract                                                                                                                                                                                                                                                                                                                                                                                 | 2                  |
|                           |        | (b) Provide in the abstract an informative and balanced summary of what was done and what was found                                                                                                                                                                                                                                                                                                                                                                    | 2-3                |
| <b>Introduction</b>       |        |                                                                                                                                                                                                                                                                                                                                                                                                                                                                        |                    |
| Background/rationale      | 2      | Explain the scientific background and rationale for the investigation being reported                                                                                                                                                                                                                                                                                                                                                                                   | 5-7                |
| Objectives                | 3      | State specific objectives, including any pre-specified hypotheses                                                                                                                                                                                                                                                                                                                                                                                                      | 7                  |
| <b>Methods</b>            |        |                                                                                                                                                                                                                                                                                                                                                                                                                                                                        |                    |
| Study design              | 4      | Present key elements of study design early in the paper                                                                                                                                                                                                                                                                                                                                                                                                                | 8                  |
| Setting                   | 5      | Describe the setting, locations, and relevant dates, including periods of recruitment, exposure, follow-up, and data collection                                                                                                                                                                                                                                                                                                                                        | 8-11               |
| Participants              | 6      | (a) <i>Cohort study</i> —Give the eligibility criteria, and the sources and methods of selection of participants. Describe methods of follow-up<br><i>Case-control study</i> —Give the eligibility criteria, and the sources and methods of case ascertainment and control selection. Give the rationale for the choice of cases and controls<br><i>Cross-sectional study</i> —Give the eligibility criteria, and the sources and methods of selection of participants | 9                  |
|                           |        | (b) <i>Cohort study</i> —For matched studies, give matching criteria and number of exposed and unexposed<br><i>Case-control study</i> —For matched studies, give matching criteria and the number of controls per case                                                                                                                                                                                                                                                 |                    |
| Variables                 | 7      | Clearly define all outcomes, exposures, predictors, potential confounders, and effect modifiers. Give diagnostic criteria, if applicable                                                                                                                                                                                                                                                                                                                               |                    |
| Data sources/ measurement | 8*     | For each variable of interest, give sources of data and details of methods of assessment (measurement). Describe comparability of assessment methods if there is more than one group                                                                                                                                                                                                                                                                                   | 8-11               |
| Bias                      | 9      | Describe any efforts to address potential sources of bias                                                                                                                                                                                                                                                                                                                                                                                                              | 9                  |
| Study size                | 10     | Explain how the study size was arrived at                                                                                                                                                                                                                                                                                                                                                                                                                              | 9                  |
| Quantitative variables    | 11     | Explain how quantitative variables were handled in the analyses. If applicable, describe which groupings were chosen and why                                                                                                                                                                                                                                                                                                                                           | 8-11               |
| Statistical methods       | 12     | (a) Describe all statistical methods, including those used to control for confounding                                                                                                                                                                                                                                                                                                                                                                                  | 10-11              |
|                           |        | (b) Describe any methods used to examine subgroups and interactions                                                                                                                                                                                                                                                                                                                                                                                                    | 10-11              |
|                           |        | (c) Explain how missing data were addressed                                                                                                                                                                                                                                                                                                                                                                                                                            | 10                 |
|                           |        | (d) <i>Cohort study</i> —If applicable, explain how loss to follow-up was addressed<br><i>Case-control study</i> —If applicable, explain how matching of cases and controls was addressed                                                                                                                                                                                                                                                                              |                    |



|                          |     |                                                                                                                                                                                                              |       |
|--------------------------|-----|--------------------------------------------------------------------------------------------------------------------------------------------------------------------------------------------------------------|-------|
|                          |     | <i>Cross-sectional study</i> —If applicable, describe analytical methods taking account of sampling strategy                                                                                                 | 10-11 |
|                          |     | (e) Describe any sensitivity analyses                                                                                                                                                                        | NA    |
| <b>Results</b>           |     |                                                                                                                                                                                                              |       |
| Participants             | 13* | (a) Report numbers of individuals at each stage of study—eg numbers potentially eligible, examined for eligibility, confirmed eligible, included in the study, completing follow-up, and analysed            | 16-17 |
|                          |     | (b) Give reasons for non-participation at each stage                                                                                                                                                         | 9     |
|                          |     | (c) Consider use of a flow diagram                                                                                                                                                                           | NA    |
| Descriptive data         | 14* | (a) Give characteristics of study participants (eg demographic, clinical, social) and information on exposures and potential confounders                                                                     | 12-13 |
|                          |     | (b) Indicate number of participants with missing data for each variable of interest                                                                                                                          | ND    |
|                          |     | (c) <i>Cohort study</i> —Summarise follow-up time (eg, average and total amount)                                                                                                                             |       |
| Outcome data             | 15* | <i>Cohort study</i> —Report numbers of outcome events or summary measures over time                                                                                                                          |       |
|                          |     | <i>Case-control study</i> —Report numbers in each exposure category, or summary measures of exposure                                                                                                         |       |
|                          |     | <i>Cross-sectional study</i> —Report numbers of outcome events or summary measures                                                                                                                           | 14    |
| Main results             | 16  | (a) Give unadjusted estimates and, if applicable, confounder-adjusted estimates and their precision (eg, 95% confidence interval). Make clear which confounders were adjusted for and why they were included | 14-20 |
|                          |     | (b) Report category boundaries when continuous variables were categorized                                                                                                                                    | NA    |
|                          |     | (c) If relevant, consider translating estimates of relative risk into absolute risk for a meaningful time period                                                                                             |       |
| Other analyses           | 17  | Report other analyses done—eg analyses of subgroups and interactions, and sensitivity analyses                                                                                                               | NA    |
| <b>Discussion</b>        |     |                                                                                                                                                                                                              |       |
| Key results              | 18  | Summarise key results with reference to study objectives                                                                                                                                                     | 21-24 |
| Limitations              | 19  | Discuss limitations of the study, taking into account sources of potential bias or imprecision. Discuss both direction and magnitude of any potential bias                                                   | 24-25 |
| Interpretation           | 20  | Give a cautious overall interpretation of results considering objectives, limitations, multiplicity of analyses, results from similar studies, and other relevant evidence                                   | 24-25 |
| Generalisability         | 21  | Discuss the generalisability (external validity) of the study results                                                                                                                                        | 24-25 |
| <b>Other information</b> |     |                                                                                                                                                                                                              |       |
| Funding                  | 22  | Give the source of funding and the role of the funders for the present study and, if applicable, for the original study on which the present article is based                                                | NA    |

\*Give information separately for cases and controls in case-control studies and, if applicable, for exposed and unexposed groups in cohort and cross-sectional studies.

**Note:** An Explanation and Elaboration article discusses each checklist item and gives methodological background and published examples of transparent reporting. The STROBE checklist is best used in conjunction with this article (freely available on the Web sites of PLoS Medicine at <http://www.plosmedicine.org/>, Annals of Internal Medicine at <http://www.annals.org/>, and Epidemiology at <http://www.epidem.com/>). Information on the STROBE Initiative is available at [www.strobe-statement.org](http://www.strobe-statement.org).

# BMJ Open

## Prevalence and time trends in overweight and obesity among urban women: An analysis of demographic and health surveys data from 24 African countries, 1991-2014

|                                 |                                                                                                                                                                                                                                                                                                                                                                               |
|---------------------------------|-------------------------------------------------------------------------------------------------------------------------------------------------------------------------------------------------------------------------------------------------------------------------------------------------------------------------------------------------------------------------------|
| Journal:                        | <i>BMJ Open</i>                                                                                                                                                                                                                                                                                                                                                               |
| Manuscript ID                   | bmjopen-2017-017344.R1                                                                                                                                                                                                                                                                                                                                                        |
| Article Type:                   | Research                                                                                                                                                                                                                                                                                                                                                                      |
| Date Submitted by the Author:   | 01-Aug-2017                                                                                                                                                                                                                                                                                                                                                                   |
| Complete List of Authors:       | Amugsi, Dickson; African Population and Health Research Center, Urbanization and Wellbeing<br>DIMBUENE, ZACHARIE; University of Kinshasa, Population Sciences and Development<br>Mberu, Blessing; African Population and Health Research Center<br>Muthuri, Stella; Africa population and Health Research Centre<br>Ezeh, Alex; African Population and Health Research Center |
| <b>Primary Subject Heading</b>: | Epidemiology                                                                                                                                                                                                                                                                                                                                                                  |
| Secondary Subject Heading:      | Nutrition and metabolism, Public health, Global health                                                                                                                                                                                                                                                                                                                        |
| Keywords:                       | Overweight, Obesity, Africa, Prevalence, Trends, Urban                                                                                                                                                                                                                                                                                                                        |
|                                 |                                                                                                                                                                                                                                                                                                                                                                               |

SCHOLARONE™  
Manuscripts

1  
2  
3  
4 1  
5  
6 2  
7  
8 3 **Prevalence and time trends in overweight and obesity among urban women: An analysis of**  
9  
10 4 **demographic and health surveys data from 24 African countries, 1991-2014**  
11  
12  
13 5  
14

15  
16 6 Dickson A. Amugsi<sup>1\*</sup>

17  
18  
19  
20 7 [damugsi2002@yahoo.com](mailto:damugsi2002@yahoo.com); [damugsi@aphrc.org](mailto:damugsi@aphrc.org)  
21

22  
23 8 Zacharie T. Dimbuene<sup>2,3</sup>

24  
25  
26 9 [zacharie.tsala.dimbuene@gmail.com](mailto:zacharie.tsala.dimbuene@gmail.com)  
27

28  
29 10 Blessing Mberu<sup>1</sup>

30  
31  
32 11 [bمبرu@aphrc.org](mailto:bمبرu@aphrc.org)  
33

34  
35 12 Stella Muthuri<sup>1</sup>

36  
37  
38 13 [smuthuri@aphrc.org](mailto:smuthuri@aphrc.org)  
39

40  
41  
42 14 Alex C. Ezeh<sup>1</sup>

43  
44  
45 15 [aezeh@aphrc.org](mailto:aezeh@aphrc.org)  
46

47  
48 16 1. African Population and Health Research Center, APHRC Campus, P.O Box 10787-00100,  
49

50  
51 17 Nairobi, Kenya  
52

53  
54 18 2. Department of Population Sciences and Development, University of Kinshasa, Democratic  
55

56  
57 19 Republic of the Congo  
58

1  
2  
3 20 3. Statistics Canada, Social Analysis and Modeling Division, Ottawa, Canada K1A 0T6  
4  
5  
6  
7 21  
8  
9  
10 22 \* Corresponding author: Dr. Dickson A. Amugsi  
11  
12  
13 23 Email: [damugsi2002@yahoo.com](mailto:damugsi2002@yahoo.com); [damugsi@aphrc.org](mailto:damugsi@aphrc.org); Mob: +254734869695  
14  
15  
16 24 Word count: 3,849  
17  
18  
19 25  
20  
21  
22 26  
23  
24  
25  
26 27  
27  
28  
29 28  
30  
31  
32 29  
33  
34  
35 30  
36  
37  
38 31  
39  
40  
41 32  
42  
43  
44  
45 33  
46  
47  
48 34  
49  
50  
51 35  
52  
53  
54 36  
55  
56  
57  
58  
59  
60

1  
2  
3 37 **Abstract**  
4  
5

6 38 **Objective(s):** To examine the prevalence and trends in overweight and obesity among non-  
7  
8  
9 39 pregnant urban women in Africa over the past two and half decades.  
10

11  
12 40 **Design:** Cross-sectional surveys conducted between 1991 and 2014.  
13

14  
15  
16 41 **Settings:** Demographic and Health Surveys (DHS), repeated cross-sectional data collected in 24  
17  
18 42 African countries.  
19

20  
21 43 **Participants:** Adult non-pregnant women aged 15–49 years. The earlier DHS surveys collected  
22  
23 44 anthropometric data on only those women who had children aged 0–5 years. The main  
24  
25 45 analyses were limited to this subgroup. The participants were classified as overweight (25.0-  
26  
27 46 29.9 kg/m<sup>2</sup>) and obese ( $\geq 30.0$  kg/m<sup>2</sup>).  
28  
29  
30

31  
32 47 **Results:** The prevalence of overweight and obesity increased in all 24 countries. Trends were  
33  
34 48 statistically significant in 17 of the 24 countries in the case of obesity and 13 of the 24 for  
35  
36 49 overweight. In Ghana, overweight almost doubled ( $p = .001$ ) while obesity tripled ( $p = .001$ )  
37  
38 50 between 1993 and 2014. Egypt has the highest levels of overweight and obesity at 44% (95%  
39  
40 51 CI: 42, 46.5) and 39% (95% CI: 36.6, 41.8) respectively in 2014 and the trend showed significant  
41  
42 52 increase ( $p = .005$ ) from 1995 levels. Also, increase in obesity doubled in Kenya, Benin, Niger,  
43  
44 53 Rwanda, Ivory Coast and Uganda, while tripled in Zambia, Burkina Faso, Mali, Malawi and  
45  
46 54 Tanzania. Ethiopia and Madagascar had the lowest prevalence of both obesity and overweight,  
47  
48 55 with overweight ranged from 7 to 12% and obesity from 1 to 4%.  
49  
50  
51  
52  
53  
54  
55  
56  
57  
58  
59  
60

1  
2  
3 56 **Conclusions:** Overweight and obesity are increasing in urban Africa, with obesity having more  
4  
5  
6 57 than doubled or tripled in 12 of the 24 countries. There is an urgent need for deliberate policies  
7  
8  
9 58 and interventions to encourage active lifestyles and healthy eating behaviour to curb this trend  
10  
11 59 in urban Africa.

12  
13  
14 60 **Keywords:** Overweight, obesity, Africa, prevalence, trends, urban  
15  
16  
17  
18 61  
19  
20  
21 62  
22  
23  
24  
25  
26  
27  
28  
29  
30  
31  
32  
33  
34  
35  
36  
37  
38  
39  
40  
41  
42  
43  
44  
45  
46  
47  
48  
49  
50  
51  
52  
53  
54  
55  
56  
57  
58  
59  
60

1  
2  
3 63 **Strengths and Limitations of the Study**  
4  
5

- 6  
7 64 • Use of nationally representative data sets, thereby enhancing the generalizability of the  
8  
9 65 findings  
10  
11 66 • Height and weight used in the calculation of BMI, was objectively measured, possibly  
12  
13 67 reducing misclassification  
14  
15 68 • Analysis limited to women with children under 5 years old and may affect the  
16  
17 69 generalizability of the findings to all women  
18  
19 70 • Lack of uniformity in the definition of urban and rural settings across countries  
20  
21  
22  
23  
24  
25 71  
26  
27  
28 72  
29  
30  
31 73  
32  
33  
34 74  
35  
36  
37 75  
38  
39  
40  
41 76  
42  
43  
44 77  
45  
46  
47 78  
48  
49  
50  
51 79  
52  
53  
54 80  
55  
56  
57 81  
58  
59  
60

## 82 Introduction

83 Overweight and obesity are global public health problems, especially among women in urban  
84 settings (1, 2). Worldwide, it is estimated that 2.8 million people die each year as a result of  
85 being overweight or obese, and that 35.8 million of global disability-adjusted life years (DALYs)  
86 are caused by overweight and obesity (3). There is also evidence that the risks of coronary heart  
87 disease, ischemic stroke and type 2 diabetes mellitus increase steadily with increasing body  
88 mass index (BMI), a measure of weight relative to height (3, 4). Furthermore, high BMI is found  
89 to elevate the risk of breast, colon, prostate, endometrium, kidney and gall bladder cancers (3).  
90 A recent study showed that overweight and obesity are linked to 13 different cancers (5).

91 The consequences of overweight and obesity on women of reproductive age are more serious,  
92 especially during pregnancy. Studies have shown that maternal obesity can result in negative  
93 outcomes in both mothers and fetuses, including gestational diabetes, preeclampsia, an  
94 increased miscarriage rate (6, 7), and stillbirth and congenital anomalies. Obesity in pregnancy  
95 can also affect health later in life for both mother and child, including increased risk of heart  
96 disease, hypertension, and diabetes (6). Children also have a risk of future obesity. Overweight  
97 and obesity are associated with decreased contraceptive efficacy and ovulatory disorders in  
98 women of reproductive age (7), and increasing maternal BMI exerts a progressive adverse  
99 effect on vaginal delivery rates for both primigravid and multigravid women (8). Obese mothers  
100 were more likely than other mothers to terminate breastfeeding when the infant showed  
101 satiation cues (9). Obese mothers with higher BMI were also reported using more restrictive  
102 feeding practices, limiting the quantity and quality of foods provided to their toddlers, and were  
103 observed to use more pressure in getting their children to eat during mealtimes (10,



1  
2  
3 104 11). Together, these findings show the varied effects of overweight and obesity on women of  
4  
5  
6 105 reproductive age and their children.  
7  
8

9 106  
10  
11  
12 107 The literature demonstrates that the magnitude of the effect of BMI on health is largely linked  
13  
14  
15 108 to the level of BMI. For instance, there is an increased risk of co-morbidities for individuals with  
16  
17 109 a BMI of 25.0 to 29.9 kg/m<sup>2</sup> (defined as overweight), and moderate to severe risk of co-  
18  
19  
20 110 morbidities for individuals with a BMI greater than 30 kg/m<sup>2</sup> (defined as obesity) (3, 6). The  
21  
22 111 World Health Organization (WHO) (3, 6) recommends that for optimum health, the median  
23  
24  
25 112 body mass index for an adult population should be in the range of 21 to 23 kg/m<sup>2</sup>, while the  
26  
27 113 goal for individuals should be to maintain body mass index in the range of 18.5 to 24.9 kg/m<sup>2</sup>.  
28  
29  
30 114 This is often difficult to achieve as evidence shows that global overweight and obesity trends  
31  
32 115 are on the rise, with the developing world now bearing the brunt of the surge (7). This dynamic  
33  
34  
35 116 calls for more studies to systematically document these trends over time, especially in  
36  
37 117 developing country contexts.  
38  
39

40 118  
41  
42  
43  
44 119 Hitherto, overweight and obesity were not public health issues on the African continent.  
45  
46 120 However, rapid changes have been observed, and many countries in Africa are currently  
47  
48  
49 121 confronted with overweight and obesity, particularly among women, coupled with a resulting  
50  
51 122 increase in the prevalence of non-communicable diseases (NCDs) (4, 12, 13). In Africa, women  
52  
53  
54 123 had approximately double the obesity prevalence of men (3), with urban settings being the  
55  
56 124 most affected. Thus, the burden of overweight and obesity among urban women is increasing  
57  
58  
59  
60

1  
2  
3 125 at an alarming rate in developing countries, and particularly in Africa for that matter (1, 14). In  
4  
5  
6 126 Ghana for example, systematic review and meta-analysis revealed that overweight among  
7  
8  
9 127 urban women was 11 percentage points higher than rural women, while obesity was two times  
10  
11 128 higher in urban relative to rural women (15). Similar trends were obtained using data from 42  
12  
13 129 countries in Asia, the Middle East, Africa (East, West, Central and Southern), and Latin America,  
14  
15  
16 130 with a combined overweight/obesity prevalence of 37.2% among urban women compared to  
17  
18  
19 131 19% of rural women (16). The study however noted regional differences, with rural women in  
20  
21 132 Latin America, the Middle East, and North Africa having much higher increases in the  
22  
23 133 prevalence of overweight/obesity compared to their urban counterparts. Conversely, in  
24  
25  
26 134 different multi-country analysis, overweight was increasing more quickly in urban areas than in  
27  
28  
29 135 rural areas of lower-income countries such as Bangladesh and Uganda, but increasing more  
30  
31 136 quickly in rural areas compared to urban areas of upper-middle-income countries, such as  
32  
33  
34 137 Jordan and Peru (17).

35  
36  
37 138  
38  
39  
40 139 The trend observed above may be attributable to an increased intake of energy-dense foods  
41  
42 140 that are high in fat; and an increase in physical inactivity due to the increasing sedentary nature  
43  
44  
45 141 of many occupations, increased use of motorized transportation, and urbanization (1, 18-20).  
46  
47  
48 142 Increasingly, sedentary lifestyles and high consumption of energy dense diets account for the  
49  
50 143 increasing burden of overweight and obesity in urban settings of low and middle-income  
51  
52 144 countries (LMIC) (21-23). Various other studies have argued that the association between urban  
53  
54  
55 145 residence and obesity in LMICs is driven largely by higher individual- and community-level  
56  
57  
58 146 socioeconomic status (SES) in urban areas, suggesting that urban residence alone may not

1  
2  
3 147 cause increased body weight in developing countries (18). However, recent studies suggest that  
4  
5  
6 148 the distribution of overweight by SES is changing in developing countries (4, 24, 25). For  
7  
8  
9 149 example, lower SES populations in some of these countries now have higher prevalence of  
10  
11 150 overweight, mimicking long-standing associations between low SES and poorer health in LMICs  
12  
13 151 (4, 24-26). This changing trend is particularly widespread among the urban population. A study  
14  
15  
16 152 in urban poor settlements in Nairobi, Kenya confirmed high levels of overweight and obesity  
17  
18 153 among women (27). Another study using data from 7 African countries showed that the  
19  
20  
21 154 increase in overweight and obesity was higher among the poorest urban dwellers compared to  
22  
23 155 the richest population subgroup (21).  
24  
25  
26  
27 156  
28  
29

30 157 Despite the emerging and worrying trend of increased overweight and obesity, and recognition  
31  
32 158 of the potential rise in chronic diseases in recent times in Africa, little effort has been made in  
33  
34  
35 159 addressing overweight and obesity on the continent (28). Consequently, an analysis of  
36  
37 160 overweight and obesity in this study across several countries in the region, is a critical step in  
38  
39  
40 161 the provision of insights into the extent of the problem over time, especially in urban settings,  
41  
42 162 which is needed to inform policy and program interventions to address the challenge in urban  
43  
44  
45 163 Africa.  
46  
47  
48 164  
49  
50

51 165 It is worth noting that while there are a number of studies that investigated overweight and  
52  
53  
54 166 obesity in Africa; most either focused on one country (13), lumped urban and rural data  
55  
56 167 together in their analyses (2, 13), analysed overweight and obesity together (26), or used one  
57  
58  
59  
60

1  
2  
3 168 data point (29). These attempts may mask the seriousness of the problem in urban settings and  
4  
5  
6 169 the important differences in the trends and prevalence of overweight and obesity over time.  
7  
8  
9 170 Also, the presentation of the results in some of these studies makes it difficult for policy makers  
10  
11 171 to appreciate the extent of the problem. The present study elucidates the prevalence and time  
12  
13 172 trends in overweight and obesity separately, and presents the results in a way that makes it  
14  
15  
16 173 easier for policy makers to understand the extent of the problem in urban settings.  
17  
18  
19 174

## 22 175 **Methods**

### 25 176 **Data sources and participants**

28  
29 177 The study used data from the Demographic and Health Surveys (DHS) programme. These are  
30  
31 178 nationally representative, repeated cross-sectional household surveys collected primarily in  
32  
33  
34 179 lower- and middle-income countries approximately every 5 years and standardized to enable  
35  
36 180 cross-country comparisons (30, 31). We restricted our analysis to data collected in 24 sub-  
37  
38  
39 181 Saharan African countries between 1991 and 2014, and containing individual anthropometric  
40  
41 182 data. There were a total of 137 survey cycles in the 24 countries, and the number of survey  
42  
43  
44 183 cycles per country ranged between three (11/137, four (8/137), and five (5/137) in the time  
45  
46 184 period under consideration. These countries were selected solely based on the number of data  
47  
48  
49 185 points (at least 3) and the availability of anthropometric data. Datasets of countries that met  
50  
51 186 the minimum requirement in terms of data points were downloaded. Data from a total 29  
52  
53  
54 187 countries were downloaded. The second stage was to examine the data for the availability of  
55  
56 188 anthropometric data. All datasets missing anthropometric data were excluded in the analysis.  
57  
58  
59  
60

1  
2  
3 189 For example, the very first DHS, conducted between 1987 and 1990 did not collect maternal  
4  
5  
6 190 anthropometric data. Hence, the dataset for this period were excluded in the analysis.

7  
8 191 Secondly, countries with three datasets, but reduced to two data points due to one of the  
9  
10 192 datasets not having anthropometric data were also excluded in the analysis.

11  
12  
13  
14 193  
15  
16  
17 194 The DHS employs a multistage sampling design. The first stage involves selecting sample points  
18  
19  
20 195 or clusters from an updated master sampling frame constructed from the National Population  
21  
22 196 and Housing Census data of the respective countries. The clusters are then selected using  
23  
24  
25 197 systematic sampling with probability proportional to size. A household listing operation is then  
26  
27 198 conducted in all the selected clusters to provide a sampling frame for the second stage  
28  
29  
30 199 selection of households. The second stage of selection involves the systematic sampling of  
31  
32 200 households listed in each cluster. The primary objective of the second stage of selection is to  
33  
34  
35 201 ensure adequate numbers of completed individual interviews to provide estimates for key  
36  
37 202 indicators with acceptable precision (31). We limited our analyses to adult non-pregnant  
38  
39  
40 203 women of reproductive age, 15–49 years in all countries. This is because pregnant women  
41  
42 204 naturally gain weight during the course of their pregnancy, including them in the analysis may  
43  
44  
45 205 present a misleading picture about the issue of overweight and obesity among women. Since  
46  
47 206 the earlier DHS surveys collected anthropometry data on only those women who had children  
48  
49  
50 207 aged 0–5 years (26, 32), we further restricted our main analyses to this subgroup. For the total  
51  
52 208 of 224,940 urban women who met eligibility criteria, anthropometric data were available for  
53  
54  
55 209 191,836 (85.3 %).

1  
2  
3 210  
4  
5  
67 **211 Ethics statement**

8  
9  
10 212 The DHS obtained ethical clearance from the ethical committees of the respective countries  
11  
12 213 before the surveys were conducted. Written informed consent was obtained from the women  
13  
14 214 before participation. The authors of this paper sought and obtained permission from the DHS  
15  
16 215 program for the use of the data. The data were completely anonymized and therefore the  
17  
18 216 authors did not seek further ethical clearance before their use.  
19  
20

21  
22  
23 217  
24  
2526 **218 Variables**

27  
28  
29 219 Height and weight were measured objectively by trained field technicians using standard  
30  
31 220 techniques (31). Weight measurements were taken using electronic Seca scales with a digital  
32  
33 221 screen. Height measurements were taken using a measuring board produced by Shorr  
34  
35 222 Productions. Height and weight measurements were then used to estimate the study  
36  
37 223 participants' body mass index (BMI). BMI, also referred to as Quetelet's Index (33), was derived  
38  
39 224 by dividing weight in kilograms by the squared height in meters. Based on the BMI ( $\text{kg}/\text{m}^2$ )  
40  
41 225 estimates, and according to World Health Organization guidelines (34), the participants were  
42  
43 226 classified as overweight ( $25.0\text{-}29.9 \text{ kg}/\text{m}^2$ ) and obese ( $\geq 30.0 \text{ kg}/\text{m}^2$ ). Trends and prevalence of  
44  
45 227 overweight and obesity were estimated for each country. Place of residence was designated as  
46  
47 228 rural and urban according to country specific definitions; however, the present analyses were  
48  
49 229 restricted to the urban sample only. This is based on the evidence that the bane of overweight  
50  
51 230 and obesity in Africa is more prevalent in the urban settings relative to other settings (18, 21).  
52  
53  
54  
55  
56  
57  
58  
59  
60

231

232 **Analytical strategy**

233 We used STATA 13 to perform the data analyses. A data file was constructed by using place of  
234 residence, country, survey year, and sample size. The analyses were conducted in three key  
235 steps. Initially, prevalence of overweight and obesity in selected countries in Africa with at least  
236 three DHS data points was graphed. In this step, only point estimates were reported, and since  
237 point estimates are not affected by the complex survey design, the DHS weight for each survey  
238 was used to get a reliable estimate. We then computed, at 95% confidence intervals (CI), the  
239 outcomes of interest by year of survey for each country in the second step. Because CIs are  
240 affected by the sampling design, we took into account the complex survey design (CSD) of DHS  
241 within the *svyset* and *svy* procedures in STATA. To avoid flawed variances and biased  
242 confidence intervals owing to the complex survey design, the analyses were conducted on the  
243 sub-sample with the full sample (urban+rural) maintained in the dataset. In STATA, this is  
244 achieved with the "subpop" in *svy* procedures. In the third step, we examined statistical  
245 significance of the trends of overweight and obesity. To achieve this, we performed a  
246 multinomial logistic regression with time (year of survey) as the key independent variable using  
247 BMI<25 kg/m<sup>2</sup> category as the base outcome and taking into account the CSD. While in steps 1  
248 and 2 the time point data sets were treated independently, we pooled the data sets for trend  
249 analyses. To account for sampling weight, the weight in the pooled data was divided by the  
250 number of surveys available for the respective countries.

251

252 **Results**

253 Table 1 presents results of the samples in the selected countries. Tables 2 and 3 present the  
 254 results of prevalence and trend analyses. Whereas Table 2 presents results for countries with  
 255 four or more data points, Table 3 presents results of countries with three data points. The  
 256 rationale for dividing the results tables into two categories is to ease interpretation of the  
 257 results for the reader. Figure 1 displays the results for all the 24 countries included in the study.

20 **Table 1: Results of samples used in the analysis**

| Country             |             |             |             |             |             |              |
|---------------------|-------------|-------------|-------------|-------------|-------------|--------------|
| <b>Ghana</b>        | <b>1993</b> | <b>1998</b> | <b>2003</b> | <b>2008</b> | <b>2014</b> | <b>Total</b> |
| <i>Samples</i>      | 583         | 656         | 966         | 2,023       | 2,130       | 6,358        |
| <b>Egypt</b>        | <b>1992</b> | <b>1995</b> | <b>2000</b> | <b>2005</b> | <b>2014</b> |              |
| <i>Samples</i>      | 3,090       | 3,779       | 4,279       | 4,595       | 5,842       | 21,555       |
| <b>Kenya</b>        | <b>1993</b> | <b>1998</b> | <b>2003</b> | <b>2008</b> | <b>2014</b> |              |
| <i>Samples</i>      | 623         | 500         | 1,398       | 1,342       | 6,369       | 10,232       |
| <b>Zambia</b>       | <b>1992</b> | <b>1996</b> | <b>2001</b> | <b>2007</b> | <b>2013</b> |              |
| <i>Samples</i>      | 2,329       | 2,099       | 1,591       | 1,867       | 4,636       | 12,522       |
| <b>Burkina Faso</b> | <b>1993</b> | <b>1998</b> | <b>2003</b> | <b>2010</b> | ---         |              |
| <i>Samples</i>      | 1,774       | 873         | 3,136       | 3,006       | ---         | 8,789        |
| <b>Benin</b>        | <b>1996</b> | <b>2001</b> | <b>2006</b> | <b>2011</b> | ---         |              |
| <i>Samples</i>      | 702         | 1,403       | 5,097       | 4,480       | ---         | 11,682       |



1  
2  
3  
4  
5  
6  
7  
8  
9  
10  
11  
12  
13  
14  
15  
16  
17  
18  
19  
20  
21  
22  
23  
24  
25  
26  
27  
28  
29  
30  
31  
32  
33  
34  
35  
36  
37  
38  
39  
40  
41  
42  
43  
44  
45  
46  
47  
48  
49  
50  
51  
52  
53  
54  
55  
56  
57  
58  
59  
60

|                    |             |             |             |             |     |        |
|--------------------|-------------|-------------|-------------|-------------|-----|--------|
| <b>Mali</b>        | <b>1995</b> | <b>2001</b> | <b>2006</b> | <b>2011</b> | --- |        |
| Samples            | 1,630       | 2,395       | 3,673       | 2,323       | --- | 10,021 |
| <b>Malawi</b>      | <b>1992</b> | <b>2000</b> | <b>2004</b> | <b>2010</b> | --- |        |
| Samples            | 999         | 1,864       | 1,022       | 1,801       | --- | 5,686  |
| <b>Niger</b>       | <b>1992</b> | <b>1998</b> | <b>2006</b> | <b>2012</b> | --- |        |
| Samples            | 2,253       | 1,069       | 2,267       | 2,453       | --- | 8,042  |
| <b>Rwanda</b>      | <b>2000</b> | <b>2005</b> | <b>2010</b> | <b>2014</b> | --- |        |
| Samples            | 1,528       | 1,524       | 1,112       | 1,604       | --- | 5,768  |
| <b>Tanzania</b>    | <b>1991</b> | <b>1996</b> | <b>2004</b> | <b>2009</b> | --- |        |
| Samples            | 1,128       | 1,247       | 1,336       | 1,404       | --- | 5115   |
| <b>Uganda</b>      | <b>1995</b> | <b>2000</b> | <b>2006</b> | <b>2011</b> | --- |        |
| Samples            | 1,462       | 1,510       | 826         | 1,539       | --- | 4,593  |
| <b>Zimbabwe</b>    | <b>1994</b> | <b>1999</b> | <b>2005</b> | <b>2010</b> | --- |        |
| Samples            | 508         | 1,685       | 1,298       | 1,500       | --- | 4,991  |
| <b>Senegal</b>     | <b>1993</b> | <b>2005</b> | <b>2010</b> | ---         | --- |        |
| Samples            | 1,683       | 3,180       | 3,373       | ---         | --- | 8,236  |
| <b>Ivory Coast</b> | <b>1994</b> | <b>1998</b> | <b>2011</b> | ---         | --- |        |
| Samples            | 1,470       | 1,040       | 2,344       | ---         | --- | 4,854  |

16

|    |                   |             |             |             |     |        |
|----|-------------------|-------------|-------------|-------------|-----|--------|
| 1  |                   |             |             |             |     |        |
| 2  |                   |             |             |             |     |        |
| 3  |                   |             |             |             |     |        |
| 4  | <b>Cameroon</b>   | <b>1998</b> | <b>2004</b> | <b>2011</b> | --- | ---    |
| 5  |                   |             |             |             |     |        |
| 6  |                   |             |             |             |     |        |
| 7  | Samples           | 838         | 2,819       | 4,161       | --- | 7,818  |
| 8  |                   |             |             |             |     |        |
| 9  |                   |             |             |             |     |        |
| 10 | <b>Ethiopia</b>   | <b>2000</b> | <b>2005</b> | <b>2011</b> | --- | ---    |
| 11 |                   |             |             |             |     |        |
| 12 |                   |             |             |             |     |        |
| 13 | Samples           | 1,550       | 1,299       | 1,817       | --- | 4,666  |
| 14 |                   |             |             |             |     |        |
| 15 |                   |             |             |             |     |        |
| 16 | <b>Guinea</b>     | <b>1999</b> | <b>2005</b> | <b>2012</b> | --- | ---    |
| 17 |                   |             |             |             |     |        |
| 18 |                   |             |             |             |     |        |
| 19 | Samples           | 1,415       | 1,263       | 1,818       | --- | 4,496  |
| 20 |                   |             |             |             |     |        |
| 21 |                   |             |             |             |     |        |
| 22 | <b>Lesotho</b>    | <b>2004</b> | <b>2009</b> | <b>2014</b> | --- | ---    |
| 23 |                   |             |             |             |     |        |
| 24 |                   |             |             |             |     |        |
| 25 | Samples           | 640         | 648         | 761         | --- | 2,049  |
| 26 |                   |             |             |             |     |        |
| 27 |                   |             |             |             |     |        |
| 28 | <b>Madagascar</b> | <b>1997</b> | <b>2003</b> | <b>2008</b> | --- | ---    |
| 29 |                   |             |             |             |     |        |
| 30 |                   |             |             |             |     |        |
| 31 | Samples           | 722         | 2,708       | 2,079       | --- | 5,509  |
| 32 |                   |             |             |             |     |        |
| 33 |                   |             |             |             |     |        |
| 34 | <b>Mozambique</b> | <b>1997</b> | <b>2003</b> | <b>2011</b> | --- | ---    |
| 35 |                   |             |             |             |     |        |
| 36 |                   |             |             |             |     |        |
| 37 | Samples           | 949         | 3,320       | 3,308       | --- | 7,577  |
| 38 |                   |             |             |             |     |        |
| 39 |                   |             |             |             |     |        |
| 40 | <b>Nigeria</b>    | <b>2003</b> | <b>2008</b> | <b>2013</b> | --- | ---    |
| 41 |                   |             |             |             |     |        |
| 42 |                   |             |             |             |     |        |
| 43 | Samples           | 1,831       | 6,659       | 8,976       | --- | 17,466 |
| 44 |                   |             |             |             |     |        |
| 45 |                   |             |             |             |     |        |
| 46 | <b>Namibia</b>    | <b>1992</b> | <b>2006</b> | <b>2013</b> | --- | ---    |
| 47 |                   |             |             |             |     |        |
| 48 |                   |             |             |             |     |        |
| 49 | Samples           | 1,090       | 1,854       | 2,142       | --- | 5,086  |
| 50 |                   |             |             |             |     |        |
| 51 |                   |             |             |             |     |        |
| 52 | <b>Chad</b>       | <b>1996</b> | <b>2004</b> | <b>2014</b> | --- | ---    |
| 53 |                   |             |             |             |     |        |
| 54 |                   |             |             |             |     |        |
| 55 | Samples           | 2,443       | 2,112       | 3,396       | --- | 7,951  |
| 56 |                   |             |             |             |     |        |
| 57 |                   |             |             |             |     |        |
| 58 |                   |             |             |             |     |        |
| 59 |                   |             |             |             |     |        |
| 60 |                   |             |             |             |     |        |

16

**Total sample**

**191,836**

258

259 Table 2 provides period estimates and trends in overweight and obesity in 13 countries with 4  
 260 or more data points. These surveys cover periods between 14 years in Rwanda and 21 years in  
 261 Ghana, Kenya and Zambia. The earliest data points in these countries were in the 1990s and the  
 262 latest are after 2010. Across all 13 countries, levels of overweight reached or exceeded 20%  
 263 only in Egypt (36%) and Zimbabwe (28%) in the 1990s surveys. Obesity reached a double digit  
 264 of 10% or more only in Egypt (34%), and Zimbabwe (13%). In all the other countries,  
 265 overweight was under 20% and obesity was under 10%. In the latest surveys conducted since  
 266 2010 in these countries, overweight exceeded 20% in all countries except Burkina Faso and  
 267 Malawi where the prevalence was around 16%. The increase overtime was not also statistically  
 268 significant in these two countries. In 4 countries, the prevalence of overweight exceeded 30%  
 269 (Egypt (44%), Niger (32%), Rwanda (31%) and Ghana (30%)). Obesity exceeded 10% in all  
 270 countries in the 2010s surveys with Egypt (39%) and Ghana (22%) leading in levels of obesity.  
 271 Only in Burkina Faso was obesity still below 10% in the most recent survey.

**Table 2: Analysis of trends in overweight and obesity for countries with four or more data points**

| Country           | 1993       | 1998       | 2003       | 2008       | 2014       | <i>p</i>      | Nature of trend |
|-------------------|------------|------------|------------|------------|------------|---------------|-----------------|
| <b>Ghana</b>      |            |            |            |            |            |               |                 |
| <i>Overweight</i> |            |            |            |            |            |               |                 |
| (%)               | 17.9       | 17.0       | 24.8       | 26.2       | 30.4       | <i>p</i> <.05 | ↗               |
| (95% CI)          | 17.9, 18.2 | 13.6, 21.1 | 21.3, 28.7 | 24.2, 28.3 | 26.3, 34.9 |               |                 |

18

*Obesity*

|          |          |            |            |            |            |       |   |
|----------|----------|------------|------------|------------|------------|-------|---|
| (%)      | 7.7      | 13.8       | 17.9       | 14.2       | 22.0       | p<.05 | ↗ |
| (95% CI) | 7.0, 8.5 | 10.6, 17.8 | 14.7, 21.5 | 12.7, 15.8 | 18.3, 26.3 |       |   |

**Egypt***Overweight*

|          |            |            |            |            |            |       |   |
|----------|------------|------------|------------|------------|------------|-------|---|
| (%)      | 35.5       | 35.0       | 40.6       | 39.1       | 44.2       | p<.05 | ↗ |
| (95% CI) | 32.9, 38.2 | 32.7, 37.3 | 38.2, 43.2 | 36.7, 41.6 | 42.0, 46.5 |       |   |

*Obesity*

|          |            |            |            |            |            |       |   |
|----------|------------|------------|------------|------------|------------|-------|---|
| (%)      | 34.2       | 29.6       | 39.1       | 41.2       | 39.2       | p<.05 | ↗ |
| (95% CI) | 31.0, 37.6 | 26.7, 32.7 | 36.4, 42.0 | 38.6, 43.9 | 36.6, 41.8 |       |   |

**Kenya***Overweight*

|          |            |            |            |            |            |       |   |
|----------|------------|------------|------------|------------|------------|-------|---|
| (%)      | 19.5       | 19.0       | 26.6       | 27.5       | 28.9       | p<.05 | ↗ |
| (95% CI) | 15.0, 24.9 | 15.4, 23.3 | 23.3, 30.3 | 22.8, 32.9 | 26.1, 31.9 |       |   |

*Obesity*

|          |          |          |           |           |            |       |   |
|----------|----------|----------|-----------|-----------|------------|-------|---|
| (%)      | 6.4      | 5.1      | 10.7      | 10.5      | 15.0       | P<.05 | ↗ |
| (95% CI) | 4.1, 9.8 | 3.3, 7.9 | 8.1, 14.1 | 7.7, 14.3 | 12.7, 17.6 |       |   |

**Zambia***Overweight*

|          |            |            |            |            |            |       |   |
|----------|------------|------------|------------|------------|------------|-------|---|
| (%)      | 17.3       | 15.7       | 12.1       | 22.0       | 23.1       | p<.05 | ↗ |
| (95% CI) | 15.2, 19.6 | 13.8, 17.9 | 10.3, 14.2 | 18.9, 25.4 | 21.2, 25.2 |       |   |

*Obesity*

|          |          |          |          |           |           |       |   |
|----------|----------|----------|----------|-----------|-----------|-------|---|
| (%)      | 4.9      | 4.4      | 4.3      | 8.4       | 11.5      | p<.05 | ↗ |
| (95% CI) | 3.8, 6.4 | 3.4, 5.7 | 3.2, 5.9 | 6.6, 10.5 | 9.8, 13.5 |       |   |

18

1  
2  
3  
4  
5  
6  
7  
8  
9  
10  
11  
12  
13  
14  
15  
16  
17  
18  
19  
20  
21  
22  
23  
24  
25  
26  
27  
28  
29  
30  
31  
32  
33  
34  
35  
36  
37  
38  
39  
40  
41  
42  
43  
44  
45  
46  
47  
48  
49  
50  
51  
52  
53  
54  
55  
56  
57  
58  
59  
60

|                     | 1993       | 1998       | 2003       | 2010       |     |       |   |
|---------------------|------------|------------|------------|------------|-----|-------|---|
| <b>Burkina Faso</b> |            |            |            |            | --- |       |   |
| <i>Overweight</i>   |            |            |            |            | --- |       |   |
| (%)                 | 14.0       | 15.2       | 21.1       | 16.5       | --- | p>.05 | → |
| (95% CI)            | 12.0, 16.3 | 12.2, 18.7 | 18.2, 24.3 | 13.8, 19.5 | --- |       |   |
| <i>Obesity</i>      |            |            |            |            | --- |       |   |
| (%)                 | 3.8        | 6.0        | 8.3        | 9.5        | --- | p<.05 | ↗ |
| (95% CI)            | 2.7, 5.2   | 4.3, 8.4   | 5.7, 11.8  | 7.2, 12.3  | --- |       |   |
| <b>Benin</b>        |            |            |            |            | --- |       |   |
| <i>Overweight</i>   |            |            |            |            | --- |       |   |
| (%)                 | 9.9        | 14.8       | 17.2       | 24.6       | --- | p<.05 | ↗ |
| (95% CI)            | 7.3, 13.4  | 12.3, 17.6 | 15.5, 18.9 | 22.7, 26.7 | --- |       |   |
| <i>Obesity</i>      |            |            |            |            | --- |       |   |
| (%)                 | 4.7        | 9.1        | 8.3        | 10.5       | --- | p<.05 | ↗ |
| (95% CI)            | 3.1, 7.0   | 7.4, 11.3  | 7.1, 9.7   | 8.9, 12.4  | --- |       |   |
| <b>Mali</b>         |            |            |            |            | --- |       |   |
| <i>Overweight</i>   |            |            |            |            | --- |       |   |
| (%)                 | 14.9       | 21.6       | 21.0       | 22.5       | --- | p<.05 | ↗ |
| (95% CI)            | 12.6, 17.4 | 18.4, 25.1 | 18.3, 23.9 | 19.1, 26.4 | --- |       |   |

20

1  
2  
3  
4  
5  
6  
7  
8  
9  
10  
11  
12  
13  
14  
15  
16  
17  
18  
19  
20  
21  
22  
23  
24  
25  
26  
27  
28  
29  
30  
31  
32  
33  
34  
35  
36  
37  
38  
39  
40  
41  
42  
43  
44  
45  
46  
47  
48  
49  
50  
51  
52  
53  
54  
55  
56  
57  
58  
59  
60

|               |             |             |             |             |     |       |   |
|---------------|-------------|-------------|-------------|-------------|-----|-------|---|
| Obesity       |             |             |             |             | --- |       |   |
| (%)           | 4.3         | 8.8         | 9.4         | 14.4        | --- | p<.05 | ↗ |
| (95% CI)      | 3.1, 5.8    | 6.9, 11.1   | 7.7, 11.4   | 11.7, 17.5  | --- |       |   |
| <b>Malawi</b> | <b>1992</b> | <b>2000</b> | <b>2004</b> | <b>2010</b> | --- |       |   |
| Overweight    |             |             |             |             | --- |       |   |
| (%)           | 15.8        | 15.9        | 15.4        | 16.4        | --- | p>.05 | → |
| (95% CI)      | 12.3, 20.0  | 13.1, 19.1  | 12.1, 19.5  | 12.7, 21.1  | --- |       |   |
| Obesity       |             |             |             |             | --- |       |   |
| (%)           | 4.1         | 3.2         | 4.3         | 12.1        | --- | P<.05 | ↗ |
| (95% CI)      | 2.6, 6.4    | 2.0, 5.1    | 2.8, 6.7    | 8.2, 17.5   | --- |       |   |
| <b>Niger</b>  | <b>1992</b> | <b>1998</b> | <b>2006</b> | <b>2012</b> | --- |       |   |
| Overweight    |             |             |             |             | --- |       |   |
| (%)           | 19.2        | 19.0        | 32.0        | 32.23       | --- | p<.05 | ↗ |
| (95% CI)      | 16.8, 22.0  | 15.5, 23.0  | 27.8, 36.6  | 28.5, 36.3  | --- |       |   |
| Obesity       |             |             |             |             | --- |       |   |
| (%)           | 6.1         | 7.0         | 12.1        | 14.4        | --- | p<.05 | ↗ |
| (95% CI)      | 4.9, 7.6    | 5.2, 9.3    | 9.4, 15.4   | 11.7, 17.6  | --- |       |   |
| <b>Rwanda</b> | <b>2000</b> | <b>2005</b> | <b>2010</b> | <b>2014</b> | --- |       |   |

20

21

1  
2  
3  
4  
5  
6  
7  
8  
9  
10  
11  
12  
13  
14  
15  
16  
17  
18  
19  
20  
21  
22  
23  
24  
25  
26  
27  
28  
29  
30  
31  
32  
33  
34  
35  
36  
37  
38  
39  
40  
41  
42  
43  
44  
45  
46  
47  
48  
49  
50  
51  
52  
53  
54  
55  
56  
57  
58  
59  
60

Overweight

---

(%)

24.4

14.4

23.3

31.1

---

p&lt;.05

↗

(95% CI)

23.1, 25.6

11.0, 18.8

19.4, 27.6

26.5, 36.1

---

Obesity

---

(%)

6.8

4.5

7.5

12.6

---

p&lt;.05

↗

(95% CI)

6.1, 7.3

2.6, 7.8

4.9, 11.4

10.0, 15.7

---

**Tanzania****1991****1996****2004****2009**

---

Overweight

---

(%)

14.1

20.5

18.9

21.0

---

p&lt;.05

↗

(95% CI)

11.1, 17.8

20.1, 20.9

18.5, 19.3

20.4, 22.2

---

Obesity

---

(%)

3.6

7.8

9.7

11.8

---

p&lt;.05

↗

(95% CI)

2.4, 5.3

7.2, 7.9

9.4, 10.1

11.1, 12.1

---

**Uganda****1995****2000****2006****2011**

---

Overweight

---

(%)

14.1

22.7

23.7

25.4

---

p&lt;.05

↗

(95% CI)

11.1, 17.8

18.9, 26.9

16.9, 32.2

20.0, 31.7

---

Obesity

---

21

22

|                 | 1994        | 1999        | 2005        | 2010        |     |        |   |
|-----------------|-------------|-------------|-------------|-------------|-----|--------|---|
| (%)             | 5.6         | 5.5         | 10.0        | 11.4        | --- | p<.05* | ↗ |
| (95% CI)        | 4.2, 7.6    | 4.0, 7.6    | 5.2, 18.3   | 7.8, 16.4   | --- |        |   |
| <b>Zimbabwe</b> | <b>1994</b> | <b>1999</b> | <b>2005</b> | <b>2010</b> | --- |        |   |
| Overweight      |             |             |             |             | --- |        |   |
| (%)             | 28.2        | 23.1        | 25.1        | 26.5        | --- | p>.05  | → |
| (95% CI)        | 23.3, 33.7  | 21.0, 25.4  | 22.0, 28.5  | 23.5, 29.7  | --- |        |   |
| Obesity         |             |             |             |             | --- |        |   |
| (%)             | 12.7        | 11.5        | 10.3        | 18.5        | --- | p>.05  | ↗ |
| (95% CI)        | 9.6, 16.7   | 10.0, 13.2  | 8.6, 12.4   | 15.5, 21.9  | --- |        |   |

↗ = increasing; ↘ = decreasing; → = stable; CI = confidence interval; p = significance level

272

273 Table 3 shows the results for the 11 countries with only three data points. The periods covered  
 274 by these surveys range from 10 years in Lesotho and Nigeria to 17 years in Senegal and Ivory  
 275 Coast. Some of the earliest surveys in these countries occurred in the 2000s and given  
 276 differences in timing and duration between the earliest and latest surveys, it made sense to  
 277 report these surveys separately. Lesotho has the highest prevalence of overweight, which  
 278 stood at 32% in 2004 and has barely changed over the subsequent 10-year period. Namibia and  
 279 Cameroon also had high levels of overweight at more than 20%. On the other hand,  
 280 Madagascar and Ethiopia had the lowest levels of overweight and obesity. In Madagascar and

22



281 Ethiopia, overweight is varied between 7 and 12% over the period covered by the surveys,  
 282 while obesity is under 5% (under 2% in Madagascar). The change of overweight over time was  
 283 statistically significant only in Guinea, Mozambique, Namibia and Chad, while obesity was  
 284 significant only in Senegal, Guinea and Cameroon.

**Table 3: Analysis of trends in overweight and obesity for countries with three data points**

| Country            |             |             |             | <i>p</i>      | Nature of trend |
|--------------------|-------------|-------------|-------------|---------------|-----------------|
| <b>Senegal</b>     | <b>1993</b> | <b>2005</b> | <b>2010</b> |               |                 |
| Overweight         |             |             |             |               |                 |
| (%)                | 18.8        | 21.9        | 21.6        | <i>p</i> >.05 | →               |
| (95% CI)           | 16.3, 21.6  | 17.0, 27.6  | 18.2, 25.4  |               |                 |
| Obesity            |             |             |             |               |                 |
| (%)                | 8.5         | 12.8        | 15.2        | <i>p</i> <.05 | ↗               |
| (95% CI)           | 6.7, 10.8   | 9.5, 17.1   | 11.9, 19.3  |               |                 |
| <b>Ivory Coast</b> | <b>1994</b> | <b>1998</b> | <b>2011</b> |               |                 |
| Overweight         |             |             |             |               |                 |
| (%)                | 18.4        | 18.8        | 24.9        | <i>p</i> >.05 | →               |
| (95% CI)           | 16.1, 20.8  | 16.1, 21.7  | 21.4, 28.8  |               |                 |
| Obesity            |             |             |             |               |                 |
| (%)                | 6.9         | 9.0         | 11.8        | <i>p</i> >.05 | →               |
| (95% CI)           | 5.1, 9.2    | 7.1, 11.4   | 9.1, 15.1   |               |                 |
| <b>Cameroon</b>    | <b>1998</b> | <b>2004</b> | <b>2011</b> |               |                 |
| Overweight         |             |             |             |               |                 |

24

(%) 24.7 27.0 26.7 p>.05 →

(95% CI) 21.3, 28.3 23.8, 30.5 23.9, 29.3

Obesity

(%) 9.3 10.9 16.1 p>.05 ↗

(95% CI) 6.7, 12.8 8.9, 13.4 14.1, 18.4

**Ethiopia** **2000** **2005** **2011**

Overweight

(%) 9.5 11.7 12.5 p>.05 →

(95% CI) 6.9, 12.9 7.5, 18.0 9.2, 16.8

Obesity

(%) 1.0 2.9 3.6 p<.05 ↗

(95% CI) 0.5, 1.7 1.5, 5.8 2.3, 5.4

**Guinea** **1999** **2005** **2012**

Overweight

(%) 18.2 17.8 25.4 p<.05 ↗

(95% CI) 15.7, 21.0 14.3, 22.0 20.9, 30.4

Obesity

(%) 6.2 7.9 9.4 p<.05 ↗

(95% CI) 4.8, 7.9 4.6, 13.3 6.9, 12.8

**Lesotho** **2004** **2009** **2014**

Overweight

(%) 32.0 30.0 29.7 p>.05 →

(95% CI) 25.3, 39.5 23.3, 37.7 22.9, 37.4

Obesity

24

25

(%) 21.9 25.8 20.3 p>.05 →

(95% CI) 15.5, 30.0 20.1, 32.4 14.7, 27.4

**Madagascar 1997 2003 2008**

Overweight

(%) 7.3 8.3 10.5 p>.05 →

(95% CI) 5.2, 10.1 6.6, 10.5 8.1, 13.5

Obesity

(%) 1.1 3.4 1.9 p>.05 →

(95% CI) 0.5, 2.6 2.4, 4.8 1.0, 3.5

**Mozambique 1997 2003 2011**

Overweight

(%) 11.1 15.1 16.0 p<.05 ↗

(95% CI) 8.4, 14.6 13.1, 19.1 14.1, 18.2

Obesity

(%) 4.0 3.2 6.3 p>.05 →

(95% CI) 2.3, 6.9 2.0, 5.1 4.7, 8.6

**Nigeria 2003 2008 2013**

Overweight

(%) 19.7 24.3 25.2 p>.05 →

(95% CI) 15.2, 25.1 22.6, 26.1 23.4, 27.1

Obesity

(%) 11.5 11.0 11.5 p>.05 →

(95% CI) 8.3, 15.6 9.7, 12.5 10.3, 12.7

**Namibia 1992 2006 2013**

25

26

## Overweight

|          |            |            |            |       |   |
|----------|------------|------------|------------|-------|---|
| (%)      | 21.4       | 22.6       | 21.5       | p>.05 | → |
| (95% CI) | 17.9, 25.4 | 19.2, 26.5 | 18.0, 25.4 |       |   |

## Obesity

|          |            |            |            |       |   |
|----------|------------|------------|------------|-------|---|
| (%)      | 12.7       | 18.9       | 18.6       | p<.05 | ↗ |
| (95% CI) | 10.3, 15.6 | 16.1, 22.1 | 15.2, 22.5 |       |   |

**Chad**

|             |             |             |
|-------------|-------------|-------------|
| <b>1996</b> | <b>2004</b> | <b>2014</b> |
|-------------|-------------|-------------|

## Overweight

|          |          |            |            |       |   |
|----------|----------|------------|------------|-------|---|
| (%)      | 10.4     | 14.9       | 16.6       | p<.05 | ↗ |
| (95% CI) | 9.6,11.4 | 12.4, 17.7 | 13.9, 19.6 |       |   |

## Obesity

|          |         |          |          |       |   |
|----------|---------|----------|----------|-------|---|
| (%)      | 3.8     | 5.7      | 6.5      | p<.05 | ↗ |
| (95% CI) | 2.9,4.1 | 3.9, 8.4 | 4.8, 8.7 |       |   |

---

↗ = increasing); ↘ = decreasing; → = stable; CI = confidence interval; p = significance level

285

286 The Figure 1 below depicts the increasing trends of overweight and obesity in all the 24  
 287 countries included in the analysis, except in Lesotho where there is semblance of a decrease.

288

289 **Figure 1: Time trends of overweight and obesity**

290

26

1  
2  
3 2914  
5  
6 2927  
8  
9  
10 293

---

11  
12  
13 294 **Countries:** BF= Burkina Faso; BJ= Benin; CI=Ivory Coast; CM= Cameroon; EG= Egypt; ET=Ethiopia; GH= Ghana; GN=

14  
15 295 Guinea; KE= Kenya; LS= Lesotho; MD= Madagascar; ML= Mali; MW= Malawi; MZ= Mozambique; NG= Nigeria; NI=

16  
17 296 Niger; NM= Namibia; RW= Rwanda; SN= Senegal; TD = Chad; TZ= Tanzania; UG= Uganda; ZM=Zambia; ZW=

18  
19 297 Zimbabwe

20  
21  
22 298

23  
24  
25 299

26  
27  
28 300

29  
30  
31 301

32  
33  
34  
35 302

36  
37  
38 303 **Discussion**

39  
40  
41 304 We set out to investigate the prevalence and time trends in overweight and obesity between

42  
43  
44 305 1991 and 2014 in 24 African countries. Primarily, we confirm that the prevalence of overweight

45  
46  
47 306 and obesity among urban women has rapidly increased in the past two and a half decades. All

48  
49  
50 307 24 countries included in our analyses experienced an increase in overweight and obesity over

51  
52  
53 308 the time period under consideration. However, the increase was only statistically significant in

54  
55  
56 309 17 of the 24 countries in the case of obesity and 13 out of the 24 for overweight. The changes

57  
58  
59 310 over time were particularly noticeable among countries with 4 or more survey data points, in

1  
2  
3 311 which case, all the 13 countries showed a statistically significant increase in obesity, while 10  
4  
5  
6 312 showed significant increase for overweight during the period of the study. For countries with  
7  
8  
9 313 three data points, only 4 of the 11 countries had a significant increase for overweight and 3 for  
10  
11 314 obesity. This suggests that length of time (number of data points) plays a role in understanding  
12  
13 315 the changes in overweight and obesity over time. We also found that 18 of the 24 countries had  
14  
15  
16 316 an overweight prevalence above 20%, based on the most recent survey waves for the  
17  
18  
19 317 respective countries. This was not the case in the earlier surveys where only 6 countries had an  
20  
21 318 overweight prevalence of 20% or above. Four countries of the 24 had an obesity prevalence  
22  
23 319 that was above 20%, with the prevalence in the rest ranging between 10% and 19% based on  
24  
25  
26 320 the latest surveys. However, in the earlier surveys, only one country had obesity prevalence of  
27  
28  
29 321 20% or more, while the rest had obesity rate ranging from 1 to 12%. This points to worsening  
30  
31 322 phenomenon of obesity among urban women in the past two and half decades. Another key  
32  
33 323 finding is that in most of the countries included in our analyses, obesity increased alongside  
34  
35  
36 324 overweight, suggesting that urban women who are overweight have a greater probability of  
37  
38  
39 325 progressing to obesity. Thus, addressing overweight will, to a larger extent curtail the  
40  
41 326 increasing incidence of obesity in urban Africa.  
42  
43  
44  
45  
46  
47  
48  
49  
50  
51  
52  
53  
54  
55  
56  
57  
58  
59  
60

327  
328 Focusing on individual countries, we found significant differences in overweight and obesity  
329 across the countries included in the analysis. For example, in the most recent surveys, Egypt has  
330 the highest prevalence of overweight (44%) and obesity (39%) by far, followed by Ghana with  
331 an overweight prevalence of 30% and obesity of 22%. Niger (32%) and Rwanda (31%) were two  
332 other countries with overweight prevalence of 30% and above. The results on Egypt are not

1  
2  
3 333 surprising as the country was previously ranked among the countries in the world with the most  
4  
5  
6 334 obese people (35). The results in Ghana are also consistent with previous findings (15). Egypt  
7  
8  
9 335 and Ghana also experienced a significant increase in overweight and obesity in the past two and  
10  
11 336 half decades. Obesity increased by 65% (7.7% to 22%) in Ghana and by 12% (34% to 39%) in  
12  
13 337 Egypt. Similarly, increase in obesity doubled in Kenya, Benin, Niger, Rwanda, Ivory Coast and  
14  
15  
16 338 Uganda, while tripled in Zambia, Burkina Faso, Mali, Malawi and Tanzania. Thus, while the  
17  
18 339 prevalence of obesity in the aforementioned countries may be considered lower than that of  
19  
20  
21 340 Egypt and Ghana, the increment overtime has been doubling or tripling in rates. This suggests  
22  
23 341 that in the next decades, the obesity rates in these countries may catch up with Egypt and  
24  
25  
26 342 Ghana, which are currently leading in terms of the level of prevalence of both overweight and  
27  
28 343 obesity. However, overweight and obesity did not show any significant changes over time in  
29  
30  
31 344 Cameroon, Lesotho, Madagascar and Nigeria. Ethiopia and Madagascar had the lowest  
32  
33 345 prevalence of both obesity and overweight. Similar findings were obtained in Ethiopia and  
34  
35  
36 346 Madagascar in a recent study using the DHS data from 32 African countries (29).  
37  
38  
39 347  
40  
41  
42 348 The increasing prevalence and trends of overweight and obesity in Africa is attributed largely to  
43  
44  
45 349 rapid urbanization taking place in the continent and its associated nutritional transition. For  
46  
47  
48 350 example, in 2010, the share of the African urban population was about 36% and is projected to  
49  
50 351 increase to 50% and 60% by 2030 and 2050 respectively (36). Using Ghana as a case in point,  
51  
52 352 for the first time, the Ghana Population and Housing Census shows that a little over half (50.9%)  
53  
54  
55 353 of country's population live in urban areas compared to rural areas (37). The growing  
56  
57 354 urbanization comes along with lifestyle changes such as decreased physical activity and  
58  
59  
60

1  
2  
3 355 increase supply of high caloric fast foods and sugar sweetened beverages (16, 38-40). Indeed,  
4  
5  
6 356 sedentary lifestyle and high consumption of energy dense diets are found to account for the  
7  
8  
9 357 increasing burden of overweight and obesity in urban settings of the low and middle income  
10  
11 358 countries (LMIC) (21-23). The consequences of which, is increase in non-communicable  
12  
13 359 diseases (NCDs), as there is substantial evidence that the risk of NCDs such as coronary heart  
14  
15  
16 360 disease, ischemic stroke and type 2 diabetes mellitus increases steadily with increasing body  
17  
18  
19 361 mass index (BMI) (3, 4, 40). In addition, an increased burden of disability-adjusted life years  
20  
21 362 (DALYs) is associated with overweight and obesity (3). It is imperative that strategies be  
22  
23 363 implemented to address the problem of overweight and obesity, thereby curbing associated  
24  
25  
26 364 NCD risk in urban Africa. Addressing the issue of overweight and obesity will be an important  
27  
28  
29 365 step towards curbing the surge of NCDs the continent is currently experiencing, which is likely  
30  
31 366 to surpass the toll of sickness and death from infectious diseases by 2030 (41). This will further  
32  
33 367 contribute greatly to the potential for African countries to achieve Sustainable Development  
34  
35  
36 368 Goals (SDG 3.4): reducing by one third premature mortality from non-communicable diseases  
37  
38  
39 369 through prevention, and treatment, and promote mental health and wellbeing by 2030 (42).

40  
41  
42 370  
43  
44  
45 371 In the light of the findings of our study and literature discussed above, we particularly advocate  
46  
47 372 for targeted interventions to address the incidence of overweight and obesity among urban  
48  
49  
50 373 dwelling women. Intervention strategies, described in the literature as 'effective and essential'  
51  
52 374 (43) in addressing overweight and obesity in a developing country context include, policy  
53  
54  
55 375 interventions and inter-sectoral partnerships; addressing food system drivers of caloric over-  
56  
57  
58 376 consumption; and improving eating and physical activity environments in key community



1  
2  
3 377 settings (43). It is believed that effective implementation of these strategies has the potential to  
4  
5  
6 378 curtail the incidence of overweight and obesity. It is important to recognize that large  
7  
8  
9 379 inequalities remain a major issue in many African countries, which may have a bearing on areas  
10  
11 380 that ought to be prioritized and targeted for interventions. For example, in many African  
12  
13 381 countries, it is common to see problems of undernutrition alongside increasing rates of  
14  
15  
16 382 overweight and obesity. This “dual burden” of undernutrition and obesity exists not only at  
17  
18  
19 383 country- or community-level, but all the way down to households (16, 44). Undernutrition  
20  
21 384 persists as a significant problem (45) in many African countries, and interventions have been  
22  
23 385 put in place to address it (46-48). However, the issue of overweight and obesity has not  
24  
25  
26 386 received adequate attention as yet in Africa (16, 48). More attention of policy makers and  
27  
28  
29 387 public health practitioners on ways to address the overweight and obesity epidemic, taking into  
30  
31 388 account undernutrition is warranted.

32  
33  
34 389

### 37 390 **Strengths and limitations**

38  
39  
40 391 The key strength of this study is the use of nationally representative data sets, thereby  
41  
42  
43 392 providing more robust estimates of the prevalence and trends of overweight and obesity in the  
44  
45  
46 393 respective countries. Further, height and weight as used in the calculation of BMI, was  
47  
48  
49 394 objectively measured by well-trained technicians, reducing possible misclassification of  
50  
51 395 overweight and obesity. The study is also associated with some limitations. To maintain sample  
52  
53 396 comparability over time, we had to limit our sample to women with children under 5 years old.  
54  
55  
56 397 This may, to some extent, affect the generalizability of the findings, as the sample may not be  
57  
58  
59  
60

1  
2  
3 398 representative of the entire female population. Another limitation is the cross-sectional nature  
4  
5  
6 399 of the data. Because the surveys used in this analysis were conducted at different times across  
7  
8  
9 400 countries, we were unable to estimate the change in BMI across all countries for the entire  
10  
11 401 survey period. Lack of uniformity in the definition of urban and rural settings may also affect  
12  
13 402 the comparability of the findings across countries, since different countries have different  
14  
15  
16 403 definitions of what constitutes urban versus rural. Lastly, one methodological limitation is that  
17  
18  
19 404 we pooled the data to perform the trend analysis, which may lead to an overestimation of  
20  
21 405 statistical power. To address this limitation, the weight in the pooled data was divided by the  
22  
23 406 number of surveys available for the country.  
24  
25  
26  
27 407  
28  
29  
30 408  
31  
32  
33 409  
34  
35

## 36 410 **Conclusions**

37  
38  
39 411 The study provided clear evidence of increase in overweight and obesity among women in the  
40  
41 412 urban settings of all the countries included in the analysis, with the increase overtime being  
42  
43 413 statistically significant in 17 of the 24 countries in the case of obesity and 13 out of the 24 for  
44  
45  
46 414 overweight. We have supported the finding that women dwelling in urban settings are prone  
47  
48  
49 415 to overweight and obesity. The prevalence of obesity increased more than two fold in most  
50  
51  
52 416 countries and more than three fold in others. The prevalence of obesity increased alongside  
53  
54  
55 417 overweight. These findings call for deliberate strategies and interventions by policy makers,  
56  
57 418 politicians and health promotion experts, focusing on healthy diet, physical activity, weight  
58  
59  
60

1  
2  
3 419 reduction and maintenance strategies in African countries, particularly in urban areas to curb  
4  
5  
6 420 the growing proportion of unhealthy weight women of child bearing age in urban Africa.  
7  
8  
9 421 Strategies should include measures such as price reduction for healthy foods (e.g., fruits and  
10  
11 422 vegetables) and promotion of physical activity.  
12  
13  
14 423  
15  
16  
17 424  
18  
19  
20 425  
21  
22  
23 426  
24  
25  
26  
27 427  
28  
29  
30 428  
31  
32  
33 429  
34  
35

### 36 430 **Acknowledgements**

37  
38  
39 431 We wish to express our profound gratitude to The DHS Program, USA for providing us access to  
40  
41  
42 432 the data. We also wish to acknowledge institutions of respective countries that played critical  
43  
44  
45 433 roles in the data collection process.  
46  
47

48 434

### 51 435 **Competing Interest**

52  
53  
54 436 The authors have no competing interests to declare.  
55  
56

### 57 437 **Funding**

1  
2  
3 438 This study did not receive funding from any source.  
4  
5

6  
7 439 **Data Sharing Statement**  
8

9  
10 440 This study was a re-analysis of existing data that are publicly available from The DHS Program at  
11  
12 441 <http://dhsprogram.com/publications/publication-fr221-dhs-final-reports.cfm>. Data are  
13  
14 442 accessible free of charge upon a registration with the Demographic and Health Survey program  
15  
16  
17 443 (The DHS Program). The registration is done on the DHS website indicated above.  
18  
19

20 444 **Authors' Contribution**  
21

22  
23  
24 445 DAA conceived and designed the study, interpreted the results, wrote the first draft of the  
25  
26 446 manuscript, and contributed to revision of the manuscript. DAA and ZTD analysed the data. ZTD  
27  
28 447 contributed to the drafting of the analytical strategy. ZTD, SM BM and ACE contributed to  
29  
30 448 study design, data interpretation, and critical revision of the manuscript. All authors take  
31  
32 449 responsibility of any issues that might arise from the publication of this manuscript.  
33  
34  
35  
36  
37 450  
38  
39  
40 451  
41  
42

43 452 **References**  
44  
45  
46 453  
47  
48

- 49  
50 454 1. Wang Y, Chen HJ, Shaikh S, Mathur P. Is obesity becoming a public health problem in India?  
51  
52 455 Examine the shift from under- to overnutrition problems over time *Obes Rev* 2009;10(4):456-74.  
53  
54 456 2. Martorell R, Khan LK, Hughes ML, Grummer-Strawn LM. Obesity in women from developing  
55  
56 457 countries. *Eur J Clin Nutr*. 2000;54.  
57  
58  
59  
60

- 1  
2  
3 458 3. World Health Organization. Obesity. Situation and trends: Global Health Observatory (GHO) data  
4  
5 459 2016 [cited 2017 01.02]. Available from: [http://www.who.int/gho/ncd/risk\\_factors/obesity\\_text/en/](http://www.who.int/gho/ncd/risk_factors/obesity_text/en/).  
6  
7  
8 460 4. Mokdad AH, Ford ES, Bowman BA et al. Prevalence of obesity, diabetes, and obesity-related  
9  
10 461 health risk factors JAMA. 2003;289(1):76-9.  
11  
12 462 5. PubMed Health. Excess body fat now linked to 13 different types of cancer: PubMed Health;  
13  
14 463 [cited 2017 02.02]. Available from:  
15  
16 464 [https://www.ncbi.nlm.nih.gov/pubmedhealth/behindtheheadlines/news/2016-08-25-excess-body-fat-](https://www.ncbi.nlm.nih.gov/pubmedhealth/behindtheheadlines/news/2016-08-25-excess-body-fat-now-linked-to-13-different-types-of-cancer/)  
17  
18 465 [now-linked-to-13-different-types-of-cancer/](https://www.ncbi.nlm.nih.gov/pubmedhealth/behindtheheadlines/news/2016-08-25-excess-body-fat-now-linked-to-13-different-types-of-cancer/).  
19  
20  
21 466 6. Leddy MA, Power ML, Schulkin J. The impact of maternal obesity on maternal and fetal health  
22  
23 467 Rev Obstet Gynecol 2008;1(4):170-8.  
24  
25 468 7. Lash MM, Armstrong A. Impact of obesity on women's health. Fertil Steril. 2009;91(5):1712-6.  
26  
27  
28 469 8. Lynch CM, Sexton DJ, Hession M, Morrison JJ. Obesity and mode of delivery in primigravid and  
29  
30 470 multigravid women Am J Perinatol. 2008;25(3):163-7.  
31  
32 471 9. Arianas EA, Rankin KM, Norr KF, White-Traut RC. Maternal weight status and responsiveness to  
33  
34 472 preterm infant behavioral cues during feeding BMC Pregnancy Childbirth. 2017;17(1):113.  
35  
36  
37 473 10. Haycraft EL, Blissett JM. Maternal and paternal controlling feeding practices: reliability and  
38  
39 474 relationships with BMI Obesity (Silver Spring). 2008;16(7):1552-8.  
40  
41 475 11. Rising R, Lifshitz F. Relationship between maternal obesity and infant feeding-interactions Nutr  
42  
43 476 J. 2005;4:17.  
44  
45  
46 477 12. Mendez MA, Monteiro CA, Popkin BM. Overweight exceeds underweight among women in  
47  
48 478 most developing countries Am J Clin Nutr. 2005;81(3):714-21.  
49  
50  
51 479 13. Kinnunen TI, Neupane S. Prevalence of overweight among women of childbearing age in Nepal:  
52  
53 480 trends from 2001 to 2011 and associations with socio-demographic factors Matern Child Health J.  
54  
55 481 2014;18(8):1846-53.  
56  
57  
58  
59  
60

- 1  
2  
3 482 14. Razak F, Corsi DJ, Slutsky AS, Kurpad A, Berkman L, Laupacis A, et al. Prevalence of Body Mass  
4  
5 483 Index Lower Than 16 Among Women in Low- and Middle-Income Countries JAMA. 2015;314(20):2164-  
6  
7 484 71.  
8  
9  
10 485 15. Ofori-Asenso R, Agyeman AA, Laar A, Boateng D. Overweight and obesity epidemic in Ghana-a  
11  
12 486 systematic review and meta-analysis BMC Public Health. 2016;16(1):1239.  
13  
14 487 16. Popkin BM, Adair LS, Ng SW. Global nutrition transition and the pandemic of obesity in  
15  
16 488 developing countries Nutr Rev 2012;70(1):3-21.  
17  
18 489 17. Neuman M, Kawachi I, Gortmaker S, Subramanian SV. Urban-rural differences in BMI in low- and  
19  
20 490 middle-income countries: the role of socioeconomic status Am J Clin Nutr 2013;97(2):428-36.  
21  
22 491 18. Neuman M, Kawachi I, Gortmaker S, Subramanian SV. Urban-rural differences in BMI in low- and  
23  
24 492 middle-income countries: the role of socioeconomic status Am J Clin Nutr. 2013;97(2):428-36.  
25  
26 493 19. Yadav K, Krishnan A. Changing patterns of diet, physical activity and obesity among urban, rural  
27  
28 494 and slum populations in north India Obes Rev 2008;9(5):400-8.  
29  
30 495 20. World Health Organization. Obesity and overweight 2016 [cited 2017 03.04]. Available from:  
31  
32 496 <http://www.who.int/mediacentre/factsheets/fs311/en/>.  
33  
34 497 21. Ziraba AK, Fotso JC, Ochako R. Overweight and obesity in urban Africa: A problem of the rich or  
35  
36 498 the poor? . BMC Public Health. 2009;9(1):1-9.  
37  
38 499 22. Abrha S, Shiferaw S, Ahmed KY. Overweight and obesity and its socio-demographic correlates  
39  
40 500 among urban Ethiopian women: evidence from the 2011 EDHS BMC Public Health. 2016;636.  
41  
42 501 23. Tebekaw Y, Teller C, Colón-Ramos U. The burden of underweight and overweight among women  
43  
44 502 in Addis Ababa, Ethiopia BMC Public Health 2014;14:1126.  
45  
46 503 24. Subramanian SV, Perkins JM, Özaltin E, Davey Smith G. Weight of nations: a socioeconomic  
47  
48 504 analysis of women in low- to middle-income countries Am J Clin Nutr. 2011;93(2):413-21.  
49  
50  
51  
52  
53  
54  
55  
56  
57  
58  
59  
60

- 1  
2  
3 505 25. Monteiro CA, Conde WL, Lu B ea. Obesity and inequities in health in the developing world Int J  
4  
5 506 Obes Relat Metab Disord. 2004;28(9):1181-6.  
6  
7  
8 507 26. Jones-Smith JC, Gordon-Larsen P, Siddiqi A, Popkin BM. Is the burden of overweight shifting to  
9  
10 508 the poor across the globe? Time trends among women in 39 low- and middle-income countries (1991-  
11  
12 509 2008). Int J Obes 2012;36(8):1114-20.  
13  
14  
15 510 27. Kimani-Murage EW, Muthuri SK, Oti SO, Mutua MK, van de Vijver S, Kyobutungi C. Evidence of a  
16  
17 511 Double Burden of Malnutrition in Urban Poor Settings in Nairobi, Kenya PLoS ONE. 2015;10(6).  
18  
19 512 28. Adeboye B, Bermano G, Rolland C. Obesity and its health impact in Africa: a systematic review.  
20  
21 513 Cardiovasc J Afr. 2012;23(9):512-21.  
22  
23  
24 514 29. Neupane S, Prakash KC, Doku DT. Overweight and obesity among women: analysis of  
25  
26 515 demographic and health survey data from 32 Sub-Saharan African Countries BMC Public Health.  
27  
28 516 2016;16:30.  
29  
30  
31 517 30. The DHS Program. Demographic and Health Surveys [cited 2017 02.02]. Available from:  
32  
33 518 [https://dhsprogram.com/data/dataset\\_admin/download-datasets.cfm](https://dhsprogram.com/data/dataset_admin/download-datasets.cfm).  
34  
35  
36 519 31. The DHS Program. DHS Methodology [cited 2017 02.02]. Available from:  
37  
38 520 <http://dhsprogram.com/What-We-Do/Survey-Types/DHS-Methodology.cfm>.  
39  
40 521 32. Shireen A, Kothari MT, Pullum T. An Assessment of the Quality of DHS Anthropometric Data,  
41  
42 522 2005-2014. DHS Methodological Reports No. 16 Rockville, Maryland, USA: ICF International, 2015.  
43  
44 523 33. Eknoyan G. Adolphe Quetelet (1796 –1874) - the average man and indices of obesity . Nephrol  
45  
46 524 Dial Transplant 2008;23:47-51.  
47  
48  
49 525 34. World Health Organization. BMI classification: WHO; 2006 [cited 2017 02.02]. Available from:  
50  
51 526 [http://apps.who.int/bmi/index.jsp?introPage=intro\\_3.html](http://apps.who.int/bmi/index.jsp?introPage=intro_3.html).  
52  
53  
54  
55  
56  
57  
58  
59  
60

- 1  
2  
3 527 35. Murray CTL, Ng M. Nearly one-third of the world's population is obese or overweight, new data  
4  
5 528 show 2016 [cited 2017 3.4]. Available from: [http://www.healthdata.org/news-release/nearly-one-third-  
8  
9 world%E2%80%99s-population-obese-or-overweight-new-data-show](http://www.healthdata.org/news-release/nearly-one-third-<br/>6<br/>7 529 world%E2%80%99s-population-obese-or-overweight-new-data-show).
- 10 530 36. African Development Bank. Urbanization in Africa 2012 [cited 2017 5.4]. Available from:  
11  
12 531 [https://www.afdb.org/en/blogs/afdb-championing-inclusive-growth-across-africa/post/urbanization-in-  
15  
16 africa-10143/](https://www.afdb.org/en/blogs/afdb-championing-inclusive-growth-across-africa/post/urbanization-in-<br/>13<br/>14 532 africa-10143/).
- 17 533 37. Ghana Statistical Service (GHS). Population and housing census: summary report of final results.  
18  
19 534 Accra: GHS, 2012.
- 20  
21 535 38. Duda RB, Dark R, Seffah J, Adanu RMK, Anarfi JK, Hill AG. Prevalence of Obesity in Women of  
22  
23 536 Accra, Ghana Afr J Health Sci 2007;14:154-59.
- 24  
25 537 39. Abubakari AR, Lauder W, Jones MC, Kirk A, Agyemang C, Bhopal RS. Prevalence and time trends  
26  
27 538 in diabetes and physical inactivity among adult West African populations: the epidemic has arrived  
28  
29 539 Public Health. 2009;123(9):602-14.
- 30  
31 540 40. Mohan V, Mathur P, Deepa R, Deepa M, Shukla DK, Menon GR, et al. Urban rural differences in  
32  
33 541 prevalence of self-reported diabetes in India--the WHO-ICMR Indian NCD risk factor surveillance  
34  
35 542 Diabetes Res Clin Pract 2008;80(1):159-68.
- 36  
37 543 41. Organization WH. Research shows higher risk of developing Non-communicable diseases in  
38  
39 544 Africa: WHO; 2016 [cited 2017 16.02]. Available from: [http://www.afro.who.int/en/media-  
44  
45 545 centre/pressreleases/item/9285-research-shows-higher-risk-of-developing-non-communicable-  
46  
47 546 diseases-in-africa.html](http://www.afro.who.int/en/media-<br/>40<br/>41 545 centre/pressreleases/item/9285-research-shows-higher-risk-of-developing-non-communicable-<br/>42<br/>43 546 diseases-in-africa.html).
- 48  
49 547 42. United Nations. Resolution adopted by the General Assembly on 25 September 2015--  
50  
51 548 Transforming our world: the 2030 Agenda for Sustainable Development 2015 [cited 2017 16.02].  
52  
53 549 Available from: [http://www.un.org/ga/search/view\\_doc.asp?symbol=A/RES/70/1&Lang=E](http://www.un.org/ga/search/view_doc.asp?symbol=A/RES/70/1&Lang=E).
- 54  
55  
56  
57  
58  
59  
60



- 1  
2  
3 550 43. Kumanyika S, Libman K, Garcia A. strategic action to combat the obesity epidemic. Report of the  
4  
5 551 Obesity Working Group 2013 2013 [cited 2017 28.7]. Available from: <http://www.wish->  
6  
7  
8 552 [qatar.org/app/media/383](http://qatar.org/app/media/383).  
9  
10 553 44. Popkin BM. The nutrition transition and obesity in the developing world J Nutr  
11  
12 554 2001;131(3):871SS-3S.  
13  
14 555 45. Mendez MA, Monteiro CA, Popkin BM. Overweight exceeds underweight among women in  
15  
16 556 most developing countries Am J Clin Nutr 2005;81(3):714-21.  
17  
18 557 46. Bosu WK. An overview of the nutrition transition in West Africa: implications for non-  
19  
20 558 communicable diseases Proc Nutr Soc 2015;74(4):466-77.  
21  
22 559 47. Jaacks LM, Slining MM, Popkin BM. Recent underweight and overweight trends by rural-urban  
23  
24 560 residence among women in low- and middle-income countries J Nutr 2015;145(2):352-7.  
25  
26 561 48. Fanzo J. The Nutrition Challenge in Sub-Saharan Africa. Working paper Rome, Italy.: UNDP  
27  
28 562 Regional Bureau for Africa 2012 [cited 2017 28.7]. Available from:  
29  
30 563 <http://www.undp.org/content/dam/rba/docs/Working%20Papers/Nutrition%20Challenge.pdf>.  
31  
32  
33  
34  
35  
36 564  
37  
38  
39  
40  
41  
42  
43  
44  
45  
46  
47  
48  
49  
50  
51  
52  
53  
54  
55  
56  
57  
58  
59  
60

1  
2  
3  
4  
5  
6  
7  
8  
9  
10  
11  
12  
13  
14  
15  
16  
17  
18  
19  
20  
21  
22  
23  
24  
25  
26  
27  
28  
29  
30  
31  
32  
33  
34  
35  
36  
37  
38  
39  
40  
41  
42  
43  
44  
45  
46  
47  
48  
49  
50  
51  
52  
53  
54  
55  
56  
57  
58  
59  
60

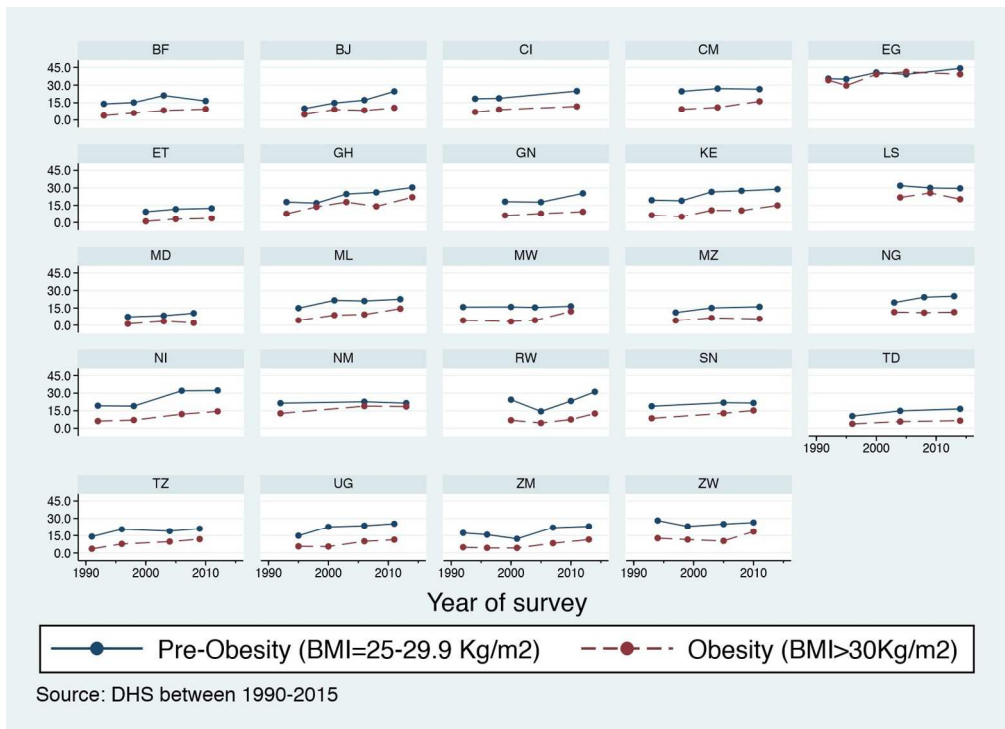

139x101mm (300 x 300 DPI)

ew only

**STROBE 2007 (v4) checklist of items to be included in reports of observational studies in epidemiology\***  
**Checklist for cohort, case-control, and cross-sectional studies (combined)**

| Section/Topic             | Item # | Recommendation                                                                                                                                                                                                                                                                                                                                                                                                                                                         | Reported on page # |
|---------------------------|--------|------------------------------------------------------------------------------------------------------------------------------------------------------------------------------------------------------------------------------------------------------------------------------------------------------------------------------------------------------------------------------------------------------------------------------------------------------------------------|--------------------|
| Title and abstract        | 1      | (a) Indicate the study’s design with a commonly used term in the title or the abstract                                                                                                                                                                                                                                                                                                                                                                                 | 2                  |
|                           |        | (b) Provide in the abstract an informative and balanced summary of what was done and what was found                                                                                                                                                                                                                                                                                                                                                                    | 2-3                |
| <b>Introduction</b>       |        |                                                                                                                                                                                                                                                                                                                                                                                                                                                                        |                    |
| Background/rationale      | 2      | Explain the scientific background and rationale for the investigation being reported                                                                                                                                                                                                                                                                                                                                                                                   | 5-7                |
| Objectives                | 3      | State specific objectives, including any pre-specified hypotheses                                                                                                                                                                                                                                                                                                                                                                                                      | 7                  |
| <b>Methods</b>            |        |                                                                                                                                                                                                                                                                                                                                                                                                                                                                        |                    |
| Study design              | 4      | Present key elements of study design early in the paper                                                                                                                                                                                                                                                                                                                                                                                                                | 8                  |
| Setting                   | 5      | Describe the setting, locations, and relevant dates, including periods of recruitment, exposure, follow-up, and data collection                                                                                                                                                                                                                                                                                                                                        | 8-11               |
| Participants              | 6      | (a) <i>Cohort study</i> —Give the eligibility criteria, and the sources and methods of selection of participants. Describe methods of follow-up<br><i>Case-control study</i> —Give the eligibility criteria, and the sources and methods of case ascertainment and control selection. Give the rationale for the choice of cases and controls<br><i>Cross-sectional study</i> —Give the eligibility criteria, and the sources and methods of selection of participants | 9                  |
|                           |        | (b) <i>Cohort study</i> —For matched studies, give matching criteria and number of exposed and unexposed<br><i>Case-control study</i> —For matched studies, give matching criteria and the number of controls per case                                                                                                                                                                                                                                                 |                    |
| Variables                 | 7      | Clearly define all outcomes, exposures, predictors, potential confounders, and effect modifiers. Give diagnostic criteria, if applicable                                                                                                                                                                                                                                                                                                                               |                    |
| Data sources/ measurement | 8*     | For each variable of interest, give sources of data and details of methods of assessment (measurement). Describe comparability of assessment methods if there is more than one group                                                                                                                                                                                                                                                                                   | 8-11               |
| Bias                      | 9      | Describe any efforts to address potential sources of bias                                                                                                                                                                                                                                                                                                                                                                                                              | 9                  |
| Study size                | 10     | Explain how the study size was arrived at                                                                                                                                                                                                                                                                                                                                                                                                                              | 9                  |
| Quantitative variables    | 11     | Explain how quantitative variables were handled in the analyses. If applicable, describe which groupings were chosen and why                                                                                                                                                                                                                                                                                                                                           | 8-11               |
| Statistical methods       | 12     | (a) Describe all statistical methods, including those used to control for confounding                                                                                                                                                                                                                                                                                                                                                                                  | 10-11              |
|                           |        | (b) Describe any methods used to examine subgroups and interactions                                                                                                                                                                                                                                                                                                                                                                                                    | 10-11              |
|                           |        | (c) Explain how missing data were addressed                                                                                                                                                                                                                                                                                                                                                                                                                            | 10                 |
|                           |        | (d) <i>Cohort study</i> —If applicable, explain how loss to follow-up was addressed<br><i>Case-control study</i> —If applicable, explain how matching of cases and controls was addressed                                                                                                                                                                                                                                                                              |                    |

|                          |     |                                                                                                                                                                                                              |       |
|--------------------------|-----|--------------------------------------------------------------------------------------------------------------------------------------------------------------------------------------------------------------|-------|
|                          |     | <i>Cross-sectional study</i> —If applicable, describe analytical methods taking account of sampling strategy                                                                                                 | 10-11 |
|                          |     | (e) Describe any sensitivity analyses                                                                                                                                                                        | NA    |
| <b>Results</b>           |     |                                                                                                                                                                                                              |       |
| Participants             | 13* | (a) Report numbers of individuals at each stage of study—eg numbers potentially eligible, examined for eligibility, confirmed eligible, included in the study, completing follow-up, and analysed            | 16-17 |
|                          |     | (b) Give reasons for non-participation at each stage                                                                                                                                                         | 9     |
|                          |     | (c) Consider use of a flow diagram                                                                                                                                                                           | NA    |
| Descriptive data         | 14* | (a) Give characteristics of study participants (eg demographic, clinical, social) and information on exposures and potential confounders                                                                     | 12-13 |
|                          |     | (b) Indicate number of participants with missing data for each variable of interest                                                                                                                          | ND    |
|                          |     | (c) <i>Cohort study</i> —Summarise follow-up time (eg, average and total amount)                                                                                                                             |       |
| Outcome data             | 15* | <i>Cohort study</i> —Report numbers of outcome events or summary measures over time                                                                                                                          |       |
|                          |     | <i>Case-control study</i> —Report numbers in each exposure category, or summary measures of exposure                                                                                                         |       |
|                          |     | <i>Cross-sectional study</i> —Report numbers of outcome events or summary measures                                                                                                                           | 14    |
| Main results             | 16  | (a) Give unadjusted estimates and, if applicable, confounder-adjusted estimates and their precision (eg, 95% confidence interval). Make clear which confounders were adjusted for and why they were included | 14-20 |
|                          |     | (b) Report category boundaries when continuous variables were categorized                                                                                                                                    | NA    |
|                          |     | (c) If relevant, consider translating estimates of relative risk into absolute risk for a meaningful time period                                                                                             |       |
| Other analyses           | 17  | Report other analyses done—eg analyses of subgroups and interactions, and sensitivity analyses                                                                                                               | NA    |
| <b>Discussion</b>        |     |                                                                                                                                                                                                              |       |
| Key results              | 18  | Summarise key results with reference to study objectives                                                                                                                                                     | 21-24 |
| Limitations              | 19  | Discuss limitations of the study, taking into account sources of potential bias or imprecision. Discuss both direction and magnitude of any potential bias                                                   | 24-25 |
| Interpretation           | 20  | Give a cautious overall interpretation of results considering objectives, limitations, multiplicity of analyses, results from similar studies, and other relevant evidence                                   | 24-25 |
| Generalisability         | 21  | Discuss the generalisability (external validity) of the study results                                                                                                                                        | 24-25 |
| <b>Other information</b> |     |                                                                                                                                                                                                              |       |
| Funding                  | 22  | Give the source of funding and the role of the funders for the present study and, if applicable, for the original study on which the present article is based                                                | NA    |

\*Give information separately for cases and controls in case-control studies and, if applicable, for exposed and unexposed groups in cohort and cross-sectional studies.

**Note:** An Explanation and Elaboration article discusses each checklist item and gives methodological background and published examples of transparent reporting. The STROBE checklist is best used in conjunction with this article (freely available on the Web sites of PLoS Medicine at <http://www.plosmedicine.org/>, Annals of Internal Medicine at <http://www.annals.org/>, and Epidemiology at <http://www.epidem.com/>). Information on the STROBE Initiative is available at [www.strobe-statement.org](http://www.strobe-statement.org).

# BMJ Open

## Prevalence and time trends in overweight and obesity among urban women: An analysis of demographic and health surveys data from 24 African countries, 1991-2014

|                                 |                                                                                                                                                                                                                                                                                                                                                                               |
|---------------------------------|-------------------------------------------------------------------------------------------------------------------------------------------------------------------------------------------------------------------------------------------------------------------------------------------------------------------------------------------------------------------------------|
| Journal:                        | <i>BMJ Open</i>                                                                                                                                                                                                                                                                                                                                                               |
| Manuscript ID                   | bmjopen-2017-017344.R2                                                                                                                                                                                                                                                                                                                                                        |
| Article Type:                   | Research                                                                                                                                                                                                                                                                                                                                                                      |
| Date Submitted by the Author:   | 15-Sep-2017                                                                                                                                                                                                                                                                                                                                                                   |
| Complete List of Authors:       | Amugsi, Dickson; African Population and Health Research Center, Urbanization and Wellbeing<br>DIMBUENE, ZACHARIE; University of Kinshasa, Population Sciences and Development<br>Mberu, Blessing; African Population and Health Research Center<br>Muthuri, Stella; Africa population and Health Research Centre<br>Ezeh, Alex; African Population and Health Research Center |
| <b>Primary Subject Heading</b>: | Epidemiology                                                                                                                                                                                                                                                                                                                                                                  |
| Secondary Subject Heading:      | Nutrition and metabolism, Public health, Global health                                                                                                                                                                                                                                                                                                                        |
| Keywords:                       | Overweight, Obesity, Africa, Prevalence, Trends, Urban                                                                                                                                                                                                                                                                                                                        |
|                                 |                                                                                                                                                                                                                                                                                                                                                                               |

SCHOLARONE™  
Manuscripts

1

2

3

4

5

6

7

8

9

10

11

12

13

14

15

16

17

18

19

20

21

22

23

24

25

26

27

28

29

30

31

**Prevalence and time trends in overweight and obesity among urban women: An analysis of demographic and health surveys data from 24 African countries, 1991-2014**

Dickson A. Amugsi<sup>1\*</sup>

damugsi2002@yahoo.com; [damugsi@aphrc.org](mailto:damugsi@aphrc.org)

Zacharie T. Dimbuene<sup>2,3</sup>

[zacharie.tsala.dimbuene@gmail.com](mailto:zacharie.tsala.dimbuene@gmail.com)

Blessing Mberu<sup>1</sup>

[bmburu@aphrc.org](mailto:bmburu@aphrc.org)

Stella Muthuri<sup>1</sup>

[smuthuri@aphrc.org](mailto:smuthuri@aphrc.org)

Alex C. Ezeh<sup>1</sup>

[aezeh@aphrc.org](mailto:aezeh@aphrc.org)

1. African Population and Health Research Center, APHRC Campus, P.O Box 10787-00100, Nairobi, Kenya

2. Department of Population Sciences and Development, University of Kinshasa, Democratic Republic of the Congo

3. Statistics Canada, Social Analysis and Modeling Division, Ottawa, Canada K1A 0T6

\* Corresponding author: Dr. Dickson A. Amugsi

Email: damugsi2002@yahoo.com; [damugsi@aphrc.org](mailto:damugsi@aphrc.org); Mob: +254734869695

Word count: 3,849

1  
2  
3 29 **Abstract**  
4

5  
6 30 **Objective(s):** To examine the prevalence and trends in overweight and obesity among non-  
7  
8  
9 31 pregnant urban women in Africa over the past two and half decades.  
10

11  
12 32 **Design:** Cross-sectional surveys conducted between 1991 and 2014.  
13

14  
15 33 **Settings:** Demographic and Health Surveys (DHS), repeated cross-sectional data collected in 24  
16  
17  
18 34 African countries.  
19

20  
21 35 **Participants:** Adult non-pregnant women aged 15–49 years. The earlier DHS surveys collected  
22  
23  
24 36 anthropometric data on only those women who had children aged 0–5 years. The main  
25  
26 37 analyses were limited to this subgroup. The participants were classified as overweight (25.0-  
27  
28 38 29.9 kg/m<sup>2</sup>) and obese ( $\geq 30.0$  kg/m<sup>2</sup>).  
29  
30

31  
32 39 **Results:** The prevalence of overweight and obesity among women increased in all the 24  
33  
34 40 countries. Trends were statistically significant in 17 of the 24 countries in the case of obesity  
35  
36 41 and 13 of the 24 for overweight. In Ghana, overweight almost doubled ( $p = .001$ ) while obesity  
37  
38 42 tripled ( $p = .001$ ) between 1993 and 2014. Egypt has the highest levels of overweight and  
39  
40 43 obesity at 44% (95% CI: 42, 46.5) and 39% (95% CI: 36.6, 41.8) respectively in 2014 and the  
41  
42 44 trend showed significant increase ( $p = .005$ ) from 1995 levels. Also, increase in obesity doubled  
43  
44 45 in Kenya, Benin, Niger, Rwanda, Ivory Coast and Uganda, while tripled in Zambia, Burkina Faso,  
45  
46 46 Mali, Malawi and Tanzania. Ethiopia and Madagascar had the lowest prevalence of both obesity  
47  
48  
49  
50 47 and overweight, with overweight ranging from 7 to 12% and obesity from 1 to 4%.  
51  
52  
53  
54  
55  
56  
57  
58  
59  
60

1  
2  
3  
4 48 **Conclusions:** Overweight and obesity are increasing among women of reproductive age in  
5  
6 49 urban Africa, with obesity among this age group having more than doubled or tripled in 12 of  
7  
8  
9 50 the 24 countries. There is an urgent need for deliberate policies and interventions to encourage  
10  
11 51 active lifestyles and healthy eating behaviour to curb this trend in urban Africa.  
12  
13

14 52 **Keywords:** Overweight, obesity, Africa, prevalence, trends, urban  
15  
16  
17  
18 53  
19  
20  
21 54  
22  
23  
24 55  
25  
26  
27  
28  
29  
30  
31  
32  
33  
34  
35  
36  
37  
38  
39  
40  
41  
42  
43  
44  
45  
46  
47  
48  
49  
50  
51  
52  
53  
54  
55  
56  
57  
58  
59  
60



1  
2  
3 56  
4  
5  
6  
7 57**Strengths and Limitations of the Study**

- 8  
9  
10 58
- Use of nationally representative data sets, thereby enhancing the generalizability of the
- 11  
12 59 findings
- Height and weight used in the calculation of BMI, was objectively measured, possibly
- 13  
14 60 reducing misclassification
- Analysis limited to women with children under 5 years old and may affect the
- 15  
16 61 generalizability of the findings to all women
- Lack of uniformity in the definition of urban and rural settings across countries
- 17  
18 62  
19 63  
20 64  
21  
22  
23  
24  
25  
26  
27  
28 65  
29  
30  
31 66  
32  
33  
34  
35 67  
36  
37  
38 68  
39  
40  
41 69  
42  
43  
44 70  
45  
46  
47  
48 71  
49  
50  
51 72  
52  
53  
54 73  
55  
56  
57 74  
58  
59  
60

## 75 Introduction

76 Overweight and obesity are global public health problems, especially among women in urban  
77 settings (1, 2). Worldwide, it is estimated that 2.8 million people die each year as a result of  
78 being overweight or obese, and that 35.8 million of global disability-adjusted life years (DALYs)  
79 are caused by overweight and obesity (3). There is also evidence that the risks of coronary heart  
80 disease, ischemic stroke and type 2 diabetes mellitus increase steadily with increasing body  
81 mass index (BMI), a measure of weight relative to height (3, 4). Furthermore, high BMI is found  
82 to elevate the risk of breast, colon, prostate, endometrium, kidney and gall bladder cancers (3).  
83 A recent study showed that overweight and obesity are linked to 13 different cancers (5).  
84 The consequences of overweight and obesity on women of reproductive age are more serious,  
85 especially during pregnancy. Studies have shown that maternal obesity can result in negative  
86 outcomes in both mothers and fetuses, including gestational diabetes, preeclampsia, an  
87 increased miscarriage rate (6, 7), and stillbirth and congenital anomalies. Obesity in pregnancy  
88 can also affect health later in life for both mother and child, including increased risk of heart  
89 disease, hypertension, and diabetes (6). Children also have a risk of future obesity. Overweight  
90 and obesity are associated with decreased contraceptive efficacy and ovulatory disorders in  
91 women of reproductive age (7), and increasing maternal BMI exerts a progressive adverse  
92 effect on vaginal delivery rates for both primigravid and multigravid women (8). Obese mothers  
93 were more likely than other mothers to terminate breastfeeding when the infant showed  
94 satiation cues (9). Obese mothers with higher BMI were also reported using more restrictive  
95 feeding practices, limiting the quantity and quality of foods provided to their toddlers, and were  
96 observed to use more pressure in getting their children to eat during mealtimes (10,

1  
2  
3 97 11). Together, these findings show the varied effects of overweight and obesity on women of  
4  
5  
6 98 reproductive age and their children.  
7  
8

9 99  
10  
11  
12 100 The literature demonstrates that the magnitude of the effect of BMI on health is largely linked  
13  
14  
15 101 to the level of BMI. For instance, there is an increased risk of co-morbidities for individuals with  
16  
17 102 a BMI of 25.0 to 29.9 kg/m<sup>2</sup> (defined as overweight), and moderate to severe risk of co-  
18  
19  
20 103 morbidities for individuals with a BMI greater than 30 kg/m<sup>2</sup> (defined as obesity) (3, 6). The  
21  
22 104 World Health Organization (WHO) (3, 6) recommends that for optimum health, the median  
23  
24  
25 105 body mass index for an adult population should be in the range of 21 to 23 kg/m<sup>2</sup>, while the  
26  
27 106 goal for individuals should be to maintain body mass index in the range of 18.5 to 24.9 kg/m<sup>2</sup>.  
28  
29  
30 107 This is often difficult to achieve as evidence shows that global overweight and obesity trends  
31  
32 108 are on the rise, with the developing world now bearing the brunt of the surge (7). This dynamic  
33  
34  
35 109 calls for more studies to systematically document these trends over time, especially in  
36  
37 110 developing country contexts.  
38  
39

40 111  
41  
42  
43  
44 112 Hitherto, overweight and obesity were not public health issues on the African continent.  
45  
46 113 However, rapid changes have been observed, and many countries in Africa are currently  
47  
48  
49 114 confronted with overweight and obesity, particularly among women, coupled with a resulting  
50  
51 115 increase in the prevalence of non-communicable diseases (NCDs) (4, 12, 13). In Africa, women  
52  
53  
54 116 had approximately double the obesity prevalence of men (3), with urban settings being the  
55  
56 117 most affected. Thus, the burden of overweight and obesity among urban women is increasing  
57  
58  
59  
60

1  
2  
3 118 at an alarming rate in developing countries, and particularly in Africa for that matter (1, 14). In  
4  
5  
6 119 Ghana for example, systematic review and meta-analysis revealed that overweight among  
7  
8  
9 120 urban women was 11 percentage points higher than rural women, while obesity was two times  
10  
11 121 higher in urban relative to rural women (15). Similar trends were obtained using data from 42  
12  
13 122 countries in Asia, the Middle East, Africa (East, West, Central and Southern), and Latin America,  
14  
15  
16 123 with a combined overweight/obesity prevalence of 37.2% among urban women compared to  
17  
18 124 19% of rural women (16). The study however noted regional differences, with rural women in  
19  
20  
21 125 Latin America, the Middle East, and North Africa having much higher increases in the  
22  
23 126 prevalence of overweight/obesity compared to their urban counterparts. Conversely, in  
24  
25  
26 127 different multi-country analysis, overweight was increasing more quickly in urban areas than in  
27  
28 128 rural areas of lower-income countries such as Bangladesh and Uganda, but increasing more  
29  
30  
31 129 quickly in rural areas compared to urban areas of upper-middle-income countries, such as  
32  
33 130 Jordan and Peru (17).

34  
35  
36  
37 131  
38  
39  
40 132 The trend observed above may be attributable to an increased intake of energy-dense foods  
41  
42 133 that are high in fat; and an increase in physical inactivity due to the increasing sedentary nature  
43  
44 134 of many occupations, increased use of motorized transportation, and urbanization (1, 18-20).  
45  
46  
47 135 Increasingly, sedentary lifestyles and high consumption of energy dense diets account for the  
48  
49  
50 136 increasing burden of overweight and obesity in urban settings of low and middle-income  
51  
52 137 countries (LMIC) (21-23). Various other studies have argued that the association between urban  
53  
54  
55 138 residence and obesity in LMICs is driven largely by higher individual- and community-level  
56  
57 139 socioeconomic status (SES) in urban areas, suggesting that urban residence alone may not  
58  
59  
60

1  
2  
3 140 cause increased body weight in developing countries (18). However, recent studies suggest that  
4  
5  
6 141 the distribution of overweight by SES is changing in developing countries (4, 24, 25). For  
7  
8  
9 142 example, lower SES populations in some of these countries now have higher prevalence of  
10  
11 143 overweight, mimicking long-standing associations between low SES and poorer health in LMICs  
12  
13 144 (4, 24-26). This changing trend is particularly widespread among the urban population. A study  
14  
15  
16 145 in urban poor settlements in Nairobi, Kenya confirmed high levels of overweight and obesity  
17  
18 146 among women (27). Another study using data from 7 African countries showed that the  
19  
20  
21 147 increase in overweight and obesity was higher among the poorest urban dwellers compared to  
22  
23 148 the richest population subgroup (21).  
24  
25  
26  
27 149

28  
29  
30 150 Despite the emerging and worrying trend of increased overweight and obesity, and recognition  
31  
32 151 of the potential rise in chronic diseases in recent times in Africa, little effort has been made in  
33  
34 152 addressing overweight and obesity on the continent (28). Consequently, an analysis of  
35  
36  
37 153 overweight and obesity in this study across several countries in the region, is a critical step in  
38  
39 154 the provision of insights into the extent of the problem over time, especially in urban settings,  
40  
41 155 which is needed to inform policy and program interventions to address the challenge in urban  
42  
43  
44 156 Africa.  
45  
46  
47  
48 157

49  
50  
51 158 It is worth noting that while there are a number of studies that investigated overweight and  
52  
53 159 obesity in Africa; most either focused on one country (13), lumped urban and rural data  
54  
55  
56 160 together in their analyses (2, 13), analysed overweight and obesity together (26), or used one  
57  
58  
59  
60

1  
2  
3 161 data point (29). These attempts may mask the seriousness of the problem in urban settings and  
4  
5  
6 162 the important differences in the trends and prevalence of overweight and obesity over time.  
7  
8  
9 163 Also, the presentation of the results in some of these studies makes it difficult for policy makers  
10  
11 164 to appreciate the extent of the problem. The present study elucidates the prevalence and time  
12  
13 165 trends in overweight and obesity separately, and presents the results in a way that makes it  
14  
15  
16 166 easier for policy makers to understand the extent of the problem in urban settings.  
17  
18  
19 167  
20  
21  
22 168  
23  
24  
25 169  
26  
27  
28 170  
29  
30  
31 171  
32  
33  
34  
35 172  
36  
37  
38 173  
39  
40  
41 174  
42  
43  
44 175  
45  
46  
47 176  
48  
49  
50  
51 177  
52  
53  
54 178  
55  
56  
57 179  
58  
59  
60

## 180 **Methods**

### 181 **Data sources and participants**

182 The study used data from the Demographic and Health Surveys (DHS) programme. These are  
183 nationally representative, repeated cross-sectional household surveys collected primarily in  
184 lower- and middle-income countries approximately every 5 years and standardized to enable  
185 cross-country comparisons (30, 31). We restricted our analysis to data collected in 24 sub-  
186 Saharan African countries between 1991 and 2014, and containing individual anthropometric  
187 data. There were a total of 137 survey cycles in the 24 countries, and the number of survey  
188 cycles per country ranged between three (11/137, four (8/137), and five (5/137) in the time  
189 period under consideration. These countries were selected solely based on the number of data  
190 points (at least 3) and the availability of anthropometric data. Data from a total 29 countries  
191 that met the minimum requirement in terms of data points were downloaded. The second  
192 stage was to examine the data for the availability of anthropometric data. All datasets missing  
193 anthropometric data were excluded in the analysis. For example, the very first DHS, conducted  
194 between 1987 and 1990 did not collect maternal anthropometric data. Hence, the dataset for  
195 this period were excluded in the analysis. Secondly, countries with three datasets, but reduced  
196 to two data points due to one of the datasets not having anthropometric data were also  
197 excluded in the analysis.

198

199 The DHS employs a multistage sampling design. The first stage involves selecting sample points  
200 or clusters from an updated master sampling frame constructed from the National Population

1  
2  
3 201 and Housing Census data of the respective countries. The clusters are then selected using  
4  
5  
6 202 systematic sampling with probability proportional to size. A household listing operation is then  
7  
8  
9 203 conducted in all the selected clusters to provide a sampling frame for the second stage  
10  
11 204 selection of households. The second stage of selection involves the systematic sampling of  
12  
13 205 households listed in each cluster. The primary objective of the second stage of selection is to  
14  
15  
16 206 ensure adequate numbers of completed individual interviews to provide estimates for key  
17  
18 207 indicators with acceptable precision (31). We limited our analyses to adult non-pregnant  
19  
20  
21 208 women of reproductive age, 15–49 years in all countries. This is because pregnant women  
22  
23 209 naturally gain weight during the course of their pregnancy, including them in the analysis may  
24  
25  
26 210 present a misleading picture about the issue of overweight and obesity among women. Since  
27  
28 211 the earlier DHS surveys collected anthropometry data on only those women who had children  
29  
30  
31 212 aged 0–5 years (26, 32), we further restricted our main analyses to this subgroup. For the total  
32  
33 213 of 224,940 urban women who met eligibility criteria, anthropometric data were available for  
34  
35  
36 214 191,836 (85.3 %).

215

## 216 **Ethics statement**

217 The DHS obtained ethical clearance from the ethical committees of the respective countries  
218 before the surveys were conducted. Written informed consent was obtained from the women  
219 before participation. The authors of this paper sought and obtained permission from the DHS  
220 program for the use of the data. The data were completely anonymized and therefore the  
221 authors did not seek further ethical clearance before their use.



**222 Variables**

223 Height and weight were measured objectively by trained field technicians using standard  
224 techniques (31). Weight measurements were taken using electronic Seca scales with a digital  
225 screen. Height measurements were taken using a measuring board produced by Shorr  
226 Productions. Height and weight measurements were then used to estimate the study  
227 participants' body mass index (BMI). BMI, also referred to as Quetelet's Index (33), was derived  
228 by dividing weight in kilograms by the squared height in meters. Based on the BMI ( $\text{kg}/\text{m}^2$ )  
229 estimates, and according to World Health Organization guidelines (34), the participants were  
230 classified as overweight ( $25.0\text{-}29.9 \text{ kg}/\text{m}^2$ ) and obese ( $\geq 30.0 \text{ kg}/\text{m}^2$ ). Trends and prevalence of  
231 overweight and obesity were estimated for each country. Place of residence was designated as  
232 rural and urban according to country specific definitions; however, the present analyses were  
233 restricted to the urban sample only. This is based on the evidence that the bane of overweight  
234 and obesity in Africa is more prevalent in the urban settings relative to other settings (18, 21).

235

**236 Analytical strategy**

237 We used STATA 13 to perform the data analyses. A data file was constructed by using place of  
238 residence, country, survey year, and sample size. The analyses were conducted in three key  
239 steps. Initially, prevalence of overweight and obesity in selected countries in Africa with at least  
240 three DHS data points was graphed. In this step, only point estimates were reported. We then  
241 computed, at 95% confidence intervals (CI), the outcomes of interest by year of survey for each  
242 country in the second step. Because CIs are affected by the sampling design, we took into

1  
2  
3 243 account the complex survey design (CSD) of DHS within the *svyset* and *svy* procedures in STATA.  
4  
5  
6 244 In STATA, this is achieved with the “subpop” in *svy* procedures. In the third step, we examined  
7  
8  
9 245 statistical significance of the trends of overweight and obesity. To achieve this, we performed a  
10  
11 246 multinomial logistic regression with time (year of survey) as the key independent variable using  
12  
13 247 BMI<25 kg/m<sup>2</sup> category as the base outcome and taking into account the CSD. While in steps 1  
14  
15  
16 248 and 2 the time point data sets were treated independently, we pooled the data sets for trend  
17  
18 249 analyses. To account for sampling weight, the weight in the pooled data was divided by the  
19  
20  
21 250 number of surveys available for the respective countries.  
22  
23  
24 251  
25  
26  
27 252  
28  
29  
30 253  
31  
32  
33 254  
34  
35  
36  
37 255  
38  
39  
40 256  
41  
42  
43 257  
44  
45  
46 258  
47  
48  
49 259  
50  
51  
52 260  
53  
54  
55  
56 261  
57  
58  
59  
60

262 **Results**

263 Table 1 presents results of the samples in the selected countries. Both Table 2 and Table 3  
 264 present the results of prevalence and trend analyses. Whereas Table 2 presents results for  
 265 countries with four or more data points, Table 3 presents results of countries with three data  
 266 points. The rationale for dividing the results into two separate tables is to ease interpretation of  
 267 the results for the reader. Figure 1 displays the results for all the 24 countries included in the  
 268 study.

269

**Table 1: Results of samples used in the analysis**

| Country             |             |             |             |             |             |              |
|---------------------|-------------|-------------|-------------|-------------|-------------|--------------|
| <b>Ghana</b>        | <b>1993</b> | <b>1998</b> | <b>2003</b> | <b>2008</b> | <b>2014</b> | <b>Total</b> |
| <i>Samples</i>      | 583         | 656         | 966         | 2,023       | 2,130       | 6,358        |
| <b>Egypt</b>        | <b>1992</b> | <b>1995</b> | <b>2000</b> | <b>2005</b> | <b>2014</b> |              |
| <i>Samples</i>      | 3,090       | 3,779       | 4,279       | 4,595       | 5,842       | 21,555       |
| <b>Kenya</b>        | <b>1993</b> | <b>1998</b> | <b>2003</b> | <b>2008</b> | <b>2014</b> |              |
| <i>Samples</i>      | 623         | 500         | 1,398       | 1,342       | 6,369       | 10,232       |
| <b>Zambia</b>       | <b>1992</b> | <b>1996</b> | <b>2001</b> | <b>2007</b> | <b>2013</b> |              |
| <i>Samples</i>      | 2,329       | 2,099       | 1,591       | 1,867       | 4,636       | 12,522       |
| <b>Burkina Faso</b> | <b>1993</b> | <b>1998</b> | <b>2003</b> | <b>2010</b> | ---         |              |
| <i>Samples</i>      | 1,774       | 873         | 3,136       | 3,006       | ---         | 8,789        |
| <b>Benin</b>        | <b>1996</b> | <b>2001</b> | <b>2006</b> | <b>2011</b> | ---         |              |
| <i>Samples</i>      | 702         | 1,403       | 5,097       | 4,480       | ---         | 11,682       |
| <b>Mali</b>         | <b>1995</b> | <b>2001</b> | <b>2006</b> | <b>2011</b> | ---         |              |
| <i>Samples</i>      | 1,630       | 2,395       | 3,673       | 2,323       | ---         | 10,021       |
| <b>Malawi</b>       | <b>1992</b> | <b>2000</b> | <b>2004</b> | <b>2010</b> | ---         |              |
| <i>Samples</i>      | 999         | 1,864       | 1,022       | 1,801       | ---         | 5,686        |
| <b>Niger</b>        | <b>1992</b> | <b>1998</b> | <b>2006</b> | <b>2012</b> | ---         |              |
| <i>Samples</i>      | 2,253       | 1,069       | 2,267       | 2,453       | ---         | 8,042        |

15

|    |                    |             |             |             |             |     |        |
|----|--------------------|-------------|-------------|-------------|-------------|-----|--------|
| 1  |                    |             |             |             |             |     |        |
| 2  |                    |             |             |             |             |     |        |
| 3  |                    |             |             |             |             |     |        |
| 4  | <b>Rwanda</b>      | <b>2000</b> | <b>2005</b> | <b>2010</b> | <b>2014</b> | --- |        |
| 5  |                    |             |             |             |             | --- |        |
| 6  | Samples            | 1,528       | 1,524       | 1,112       | 1,604       | --- | 5,768  |
| 7  |                    |             |             |             |             | --- |        |
| 8  | <b>Tanzania</b>    | <b>1991</b> | <b>1996</b> | <b>2004</b> | <b>2009</b> | --- |        |
| 9  |                    |             |             |             |             | --- |        |
| 10 | Samples            | 1,128       | 1,247       | 1,336       | 1,404       | --- | 5115   |
| 11 |                    |             |             |             |             | --- |        |
| 12 | <b>Uganda</b>      | <b>1995</b> | <b>2000</b> | <b>2006</b> | <b>2011</b> | --- |        |
| 13 |                    |             |             |             |             | --- |        |
| 14 | Samples            | 1,462       | 1,510       | 826         | 1,539       | --- | 4,593  |
| 15 |                    |             |             |             |             | --- |        |
| 16 | <b>Zimbabwe</b>    | <b>1994</b> | <b>1999</b> | <b>2005</b> | <b>2010</b> | --- |        |
| 17 |                    |             |             |             |             | --- |        |
| 18 | Samples            | 508         | 1,685       | 1,298       | 1,500       | --- | 4,991  |
| 19 |                    |             |             |             | ---         | --- |        |
| 20 | <b>Senegal</b>     | <b>1993</b> | <b>2005</b> | <b>2010</b> |             | --- |        |
| 21 |                    |             |             |             | ---         | --- |        |
| 22 | Samples            | 1,683       | 3,180       | 3,373       |             | --- | 8,236  |
| 23 |                    |             |             |             | ---         | --- |        |
| 24 | <b>Ivory Coast</b> | <b>1994</b> | <b>1998</b> | <b>2011</b> |             | --- |        |
| 25 |                    |             |             |             | ---         | --- |        |
| 26 | Samples            | 1,470       | 1,040       | 2,344       |             | --- | 4,854  |
| 27 |                    |             |             |             | ---         | --- |        |
| 28 | <b>Cameroon</b>    | <b>1998</b> | <b>2004</b> | <b>2011</b> |             | --- |        |
| 29 |                    |             |             |             | ---         | --- |        |
| 30 | Samples            | 838         | 2,819       | 4,161       |             | --- | 7,818  |
| 31 |                    |             |             |             | ---         | --- |        |
| 32 | <b>Ethiopia</b>    | <b>2000</b> | <b>2005</b> | <b>2011</b> |             | --- |        |
| 33 |                    |             |             |             | ---         | --- |        |
| 34 | Samples            | 1,550       | 1,299       | 1,817       |             | --- | 4,666  |
| 35 |                    |             |             |             | ---         | --- |        |
| 36 | <b>Guinea</b>      | <b>1999</b> | <b>2005</b> | <b>2012</b> |             | --- |        |
| 37 |                    |             |             |             | ---         | --- |        |
| 38 | Samples            | 1,415       | 1,263       | 1,818       |             | --- | 4,496  |
| 39 |                    |             |             |             | ---         | --- |        |
| 40 | <b>Lesotho</b>     | <b>2004</b> | <b>2009</b> | <b>2014</b> |             | --- |        |
| 41 |                    |             |             |             | ---         | --- |        |
| 42 | Samples            | 640         | 648         | 761         |             | --- | 2,049  |
| 43 |                    |             |             |             | ---         | --- |        |
| 44 | <b>Madagascar</b>  | <b>1997</b> | <b>2003</b> | <b>2008</b> |             | --- |        |
| 45 |                    |             |             |             | ---         | --- |        |
| 46 | Samples            | 722         | 2,708       | 2,079       |             | --- | 5,509  |
| 47 |                    |             |             |             | ---         | --- |        |
| 48 | <b>Mozambique</b>  | <b>1997</b> | <b>2003</b> | <b>2011</b> |             | --- |        |
| 49 |                    |             |             |             | ---         | --- |        |
| 50 | Samples            | 949         | 3,320       | 3,308       |             | --- | 7,577  |
| 51 |                    |             |             |             | ---         | --- |        |
| 52 | <b>Nigeria</b>     | <b>2003</b> | <b>2008</b> | <b>2013</b> |             | --- |        |
| 53 |                    |             |             |             | ---         | --- |        |
| 54 | Samples            | 1,831       | 6,659       | 8,976       |             | --- | 17,466 |
| 55 |                    |             |             |             | ---         | --- |        |
| 56 | <b>Namibia</b>     | <b>1992</b> | <b>2006</b> | <b>2013</b> |             | --- |        |
| 57 |                    |             |             |             | ---         | --- |        |
| 58 | Samples            | 1,090       | 1,854       | 2,142       |             | --- | 5,086  |
| 59 |                    |             |             |             |             |     |        |
| 60 |                    |             |             |             |             |     |        |

15

|                     |             |             |             |     |     |                |
|---------------------|-------------|-------------|-------------|-----|-----|----------------|
| <b>Chad</b>         | <b>1996</b> | <b>2004</b> | <b>2014</b> | --- | --- |                |
| Samples             | 2,443       | 2,112       | 3,396       | --- | --- | 7,951          |
| <b>Total sample</b> |             |             |             |     |     | <b>191,836</b> |

270

271 Table 2 provides period estimates and trends in overweight and obesity in 13 countries with 4  
 272 or more data points. These surveys cover periods between 14 years in Rwanda and 21 years in  
 273 Ghana, Kenya and Zambia. The earliest data points in these countries were in the 1990s and the  
 274 latest are after 2010. Across all 13 countries, levels of overweight reached or exceeded 20%  
 275 only in Egypt (36%) and Zimbabwe (28%) in the 1990s surveys. Obesity reached a double digit  
 276 of 10% or more only in Egypt (34%), and Zimbabwe (13%). In all the other countries,  
 277 overweight was under 20% and obesity was under 10%. In the latest surveys conducted since  
 278 2010 in these countries, overweight exceeded 20% in all countries except Burkina Faso and  
 279 Malawi where the prevalence was around 16%. The increase overtime was not also statistically  
 280 significant in these two countries. In 4 countries, the prevalence of overweight exceeded 30%  
 281 (Egypt (44%), Niger (32%), Rwanda (31%) and Ghana (30%)). Obesity exceeded 10% in all  
 282 countries in the 2010s surveys with Egypt (39%) and Ghana (22%) leading in levels of obesity.  
 283 Only in Burkina Faso was obesity still below 10% in the most recent survey.

**Table 2: Analysis of trends in overweight and obesity for countries with four or more data points**

| Country           |             |             |             |             |             | <i>p</i> | Nature of trend |
|-------------------|-------------|-------------|-------------|-------------|-------------|----------|-----------------|
| <b>Ghana</b>      | <b>1993</b> | <b>1998</b> | <b>2003</b> | <b>2008</b> | <b>2014</b> |          |                 |
| <i>Overweight</i> |             |             |             |             |             |          |                 |
| (%)               | 17.9        | 17.0        | 24.8        | 26.2        | 30.4        | p<.05    | ↗               |
| (95% CI)          | 17.9, 18.2  | 13.6, 21.1  | 21.3, 28.7  | 24.2, 28.3  | 26.3, 34.9  |          |                 |
| <i>Obesity</i>    |             |             |             |             |             |          |                 |
| (%)               | 7.7         | 13.8        | 17.9        | 14.2        | 22.0        | p<.05    | ↗               |
| (95% CI)          | 7.0, 8.5    | 10.6, 17.8  | 14.7, 21.5  | 12.7, 15.8  | 18.3, 26.3  |          |                 |
| <b>Egypt</b>      | <b>1995</b> | <b>2000</b> | <b>2005</b> | <b>2008</b> | <b>2014</b> |          |                 |

1  
2  
3  
4  
5  
6  
7  
8  
9  
10  
11  
12  
13  
14  
15  
16  
17  
18  
19  
20  
21  
22  
23  
24  
25  
26  
27  
28  
29  
30  
31  
32  
33  
34  
35  
36  
37  
38  
39  
40  
41  
42  
43  
44  
45  
46  
47  
48  
49  
50  
51  
52  
53  
54  
55  
56  
57  
58  
59  
60

|                     |             |             |             |             |             |       |   |
|---------------------|-------------|-------------|-------------|-------------|-------------|-------|---|
| <i>Overweight</i>   |             |             |             |             |             |       |   |
| (%)                 | 35.5        | 35.0        | 40.6        | 39.1        | 44.2        | p<.05 | ↗ |
| (95% CI)            | 32.9, 38.2  | 32.7, 37.3  | 38.2, 43.2  | 36.7, 41.6  | 42.0, 46.5  |       |   |
| <i>Obesity</i>      |             |             |             |             |             |       |   |
| (%)                 | 34.2        | 29.6        | 39.1        | 41.2        | 39.2        | p<.05 | ↗ |
| (95% CI)            | 31.0, 37.6  | 26.7, 32.7  | 36.4, 42.0  | 38.6, 43.9  | 36.6, 41.8  |       |   |
| <b>Kenya</b>        | <b>1993</b> | <b>1998</b> | <b>2003</b> | <b>2008</b> | <b>2014</b> |       |   |
| <i>Overweight</i>   |             |             |             |             |             |       |   |
| (%)                 | 19.5        | 19.0        | 26.6        | 27.5        | 28.9        | p<.05 | ↗ |
| (95% CI)            | 15.0, 24.9  | 15.4, 23.3  | 23.3, 30.3  | 22.8, 32.9  | 26.1, 31.9  |       |   |
| <i>Obesity</i>      |             |             |             |             |             |       |   |
| (%)                 | 6.4         | 5.1         | 10.7        | 10.5        | 15.0        | P<.05 | ↗ |
| (95% CI)            | 4.1, 9.8    | 3.3, 7.9    | 8.1, 14.1   | 7.7, 14.3   | 12.7, 17.6  |       |   |
| <b>Zambia</b>       | <b>1992</b> | <b>1996</b> | <b>2001</b> | <b>2007</b> | <b>2013</b> |       |   |
| <i>Overweight</i>   |             |             |             |             |             |       |   |
| (%)                 | 17.3        | 15.7        | 12.1        | 22.0        | 23.1        | p<.05 | ↗ |
| (95% CI)            | 15.2, 19.6  | 13.8, 17.9  | 10.3, 14.2  | 18.9, 25.4  | 21.2, 25.2  |       |   |
| <i>Obesity</i>      |             |             |             |             |             |       |   |
| (%)                 | 4.9         | 4.4         | 4.3         | 8.4         | 11.5        | p<.05 | ↗ |
| (95% CI)            | 3.8, 6.4    | 3.4, 5.7    | 3.2, 5.9    | 6.6, 10.5   | 9.8, 13.5   |       |   |
| <b>Burkina Faso</b> | <b>1993</b> | <b>1998</b> | <b>2003</b> | <b>2010</b> | ---         |       |   |
| <i>Overweight</i>   |             |             |             |             | ---         |       |   |
| (%)                 | 14.0        | 15.2        | 21.1        | 16.5        | ---         | p>.05 | → |
| (95% CI)            | 12.0, 16.3  | 12.2, 18.7  | 18.2, 24.3  | 13.8, 19.5  | ---         |       |   |
| <i>Obesity</i>      |             |             |             |             | ---         |       |   |
| (%)                 | 3.8         | 6.0         | 8.3         | 9.5         | ---         | p<.05 | ↗ |
| (95% CI)            | 2.7, 5.2    | 4.3, 8.4    | 5.7, 11.8   | 7.2, 12.3   | ---         |       |   |
| <b>Benin</b>        | <b>1996</b> | <b>2001</b> | <b>2006</b> | <b>2011</b> | ---         |       |   |
| <i>Overweight</i>   |             |             |             |             | ---         |       |   |
| (%)                 | 9.9         | 14.8        | 17.2        | 24.6        | ---         | p<.05 | ↗ |
| (95% CI)            | 7.3, 13.4   | 12.3, 17.6  | 15.5, 18.9  | 22.7, 26.7  | ---         |       |   |
| <i>Obesity</i>      |             |             |             |             | ---         |       |   |
| (%)                 | 4.7         | 9.1         | 8.3         | 10.5        | ---         | p<.05 | ↗ |
| (95% CI)            | 3.1, 7.0    | 7.4, 11.3   | 7.1, 9.7    | 8.9, 12.4   | ---         |       |   |
| <b>Mali</b>         | <b>1995</b> | <b>2001</b> | <b>2006</b> | <b>2011</b> | ---         |       |   |

18

|    |                 |             |             |             |             |       |   |
|----|-----------------|-------------|-------------|-------------|-------------|-------|---|
| 1  |                 |             |             |             |             |       |   |
| 2  |                 |             |             |             |             |       |   |
| 3  |                 |             |             |             |             |       |   |
| 4  | Overweight      |             |             |             | ---         |       |   |
| 5  | (%)             | 14.9        | 21.6        | 21.0        | 22.5        | ---   |   |
| 6  |                 |             |             |             |             | p<.05 | ↗ |
| 7  | (95% CI)        | 12.6, 17.4  | 18.4, 25.1  | 18.3, 23.9  | 19.1, 26.4  | ---   |   |
| 8  |                 |             |             |             |             |       |   |
| 9  | Obesity         |             |             |             |             |       |   |
| 10 | (%)             | 4.3         | 8.8         | 9.4         | 14.4        | ---   |   |
| 11 |                 |             |             |             |             | p<.05 | ↗ |
| 12 | (95% CI)        | 3.1, 5.8    | 6.9, 11.1   | 7.7, 11.4   | 11.7, 17.5  | ---   |   |
| 13 |                 |             |             |             |             |       |   |
| 14 | <b>Malawi</b>   | <b>1992</b> | <b>2000</b> | <b>2004</b> | <b>2010</b> | ---   |   |
| 15 |                 |             |             |             |             |       |   |
| 16 | Overweight      |             |             |             |             |       |   |
| 17 | (%)             | 15.8        | 15.9        | 15.4        | 16.4        | ---   |   |
| 18 |                 |             |             |             |             | p>.05 | → |
| 19 | (95% CI)        | 12.3, 20.0  | 13.1, 19.1  | 12.1, 19.5  | 12.7, 21.1  | ---   |   |
| 20 |                 |             |             |             |             |       |   |
| 21 | Obesity         |             |             |             |             |       |   |
| 22 | (%)             | 4.1         | 3.2         | 4.3         | 12.1        | ---   |   |
| 23 |                 |             |             |             |             | P<.05 | ↗ |
| 24 | (95% CI)        | 2.6, 6.4    | 2.0, 5.1    | 2.8, 6.7    | 8.2, 17.5   | ---   |   |
| 25 |                 |             |             |             |             |       |   |
| 26 | <b>Niger</b>    | <b>1992</b> | <b>1998</b> | <b>2006</b> | <b>2012</b> | ---   |   |
| 27 |                 |             |             |             |             |       |   |
| 28 | Overweight      |             |             |             |             |       |   |
| 29 | (%)             | 19.2        | 19.0        | 32.0        | 32.23       | ---   |   |
| 30 |                 |             |             |             |             | p<.05 | ↗ |
| 31 | (95% CI)        | 16.8, 22.0  | 15.5, 23.0  | 27.8, 36.6  | 28.5, 36.3  | ---   |   |
| 32 |                 |             |             |             |             |       |   |
| 33 | Obesity         |             |             |             |             |       |   |
| 34 | (%)             | 6.1         | 7.0         | 12.1        | 14.4        | ---   |   |
| 35 |                 |             |             |             |             | p<.05 | ↗ |
| 36 | (95% CI)        | 4.9, 7.6    | 5.2, 9.3    | 9.4, 15.4   | 11.7, 17.6  | ---   |   |
| 37 |                 |             |             |             |             |       |   |
| 38 | <b>Rwanda</b>   | <b>2000</b> | <b>2005</b> | <b>2010</b> | <b>2014</b> | ---   |   |
| 39 |                 |             |             |             |             |       |   |
| 40 | Overweight      |             |             |             |             |       |   |
| 41 | (%)             | 24.4        | 14.4        | 23.3        | 31.1        | ---   |   |
| 42 |                 |             |             |             |             | p<.05 | ↗ |
| 43 | (95% CI)        | 23.1, 25.6  | 11.0, 18.8  | 19.4, 27.6  | 26.5, 36.1  | ---   |   |
| 44 |                 |             |             |             |             |       |   |
| 45 | Obesity         |             |             |             |             |       |   |
| 46 | (%)             | 6.8         | 4.5         | 7.5         | 12.6        | ---   |   |
| 47 |                 |             |             |             |             | p<.05 | ↗ |
| 48 | (95% CI)        | 6.1, 7.3    | 2.6, 7.8    | 4.9, 11.4   | 10.0, 15.7  | ---   |   |
| 49 |                 |             |             |             |             |       |   |
| 50 | <b>Tanzania</b> | <b>1991</b> | <b>1996</b> | <b>2004</b> | <b>2009</b> | ---   |   |
| 51 |                 |             |             |             |             |       |   |
| 52 |                 |             |             |             |             |       |   |
| 53 |                 |             |             |             |             |       |   |
| 54 |                 |             |             |             |             |       |   |
| 55 |                 |             |             |             |             |       |   |
| 56 |                 |             |             |             |             |       |   |
| 57 |                 |             |             |             |             |       |   |
| 58 |                 |             |             |             |             |       |   |
| 59 |                 |             |             |             |             |       |   |
| 60 |                 |             |             |             |             |       |   |

18

|    |                 |             |             |             |             |        |   |
|----|-----------------|-------------|-------------|-------------|-------------|--------|---|
| 1  |                 |             |             |             |             |        |   |
| 2  |                 |             |             |             |             |        |   |
| 3  |                 |             |             |             |             |        |   |
| 4  | Overweight      |             |             |             | ---         |        |   |
| 5  |                 |             |             |             | ---         |        |   |
| 6  | (%)             | 14.1        | 20.5        | 18.9        | 21.0        | p<.05  | ↗ |
| 7  |                 |             |             |             | ---         |        |   |
| 8  | (95% CI)        | 11.1, 17.8  | 20.1, 20.9  | 18.5, 19.3  | 20.4, 22.2  |        |   |
| 9  |                 |             |             |             | ---         |        |   |
| 10 | Obesity         |             |             |             |             |        |   |
| 11 |                 |             |             |             | ---         |        |   |
| 12 | (%)             | 3.6         | 7.8         | 9.7         | 11.8        | p<.05  | ↗ |
| 13 |                 |             |             |             | ---         |        |   |
| 14 | (95% CI)        | 2.4, 5.3    | 7.2, 7.9    | 9.4, 10.1   | 11.1, 12.1  |        |   |
| 15 |                 |             |             |             | ---         |        |   |
| 16 | <b>Uganda</b>   | <b>1995</b> | <b>2000</b> | <b>2006</b> | <b>2011</b> |        |   |
| 17 |                 |             |             |             |             |        |   |
| 18 | Overweight      |             |             |             |             |        |   |
| 19 |                 |             |             |             |             |        |   |
| 20 | (%)             | 14.1        | 22.7        | 23.7        | 25.4        | p<.05  | ↗ |
| 21 |                 |             |             |             |             |        |   |
| 22 | (95% CI)        | 11.1, 17.8  | 18.9, 26.9  | 16.9, 32.2  | 20.0, 31.7  |        |   |
| 23 |                 |             |             |             |             |        |   |
| 24 | Obesity         |             |             |             |             |        |   |
| 25 |                 |             |             |             |             |        |   |
| 26 | (%)             | 5.6         | 5.5         | 10.0        | 11.4        | p<.05* | ↗ |
| 27 |                 |             |             |             |             |        |   |
| 28 | (95% CI)        | 4.2, 7.6    | 4.0, 7.6    | 5.2, 18.3   | 7.8, 16.4   |        |   |
| 29 |                 |             |             |             |             |        |   |
| 30 | <b>Zimbabwe</b> | <b>1994</b> | <b>1999</b> | <b>2005</b> | <b>2010</b> |        |   |
| 31 |                 |             |             |             |             |        |   |
| 32 | Overweight      |             |             |             |             |        |   |
| 33 |                 |             |             |             |             |        |   |
| 34 | (%)             | 28.2        | 23.1        | 25.1        | 26.5        | p>.05  | → |
| 35 |                 |             |             |             |             |        |   |
| 36 | (95% CI)        | 23.3, 33.7  | 21.0, 25.4  | 22.0, 28.5  | 23.5, 29.7  |        |   |
| 37 |                 |             |             |             |             |        |   |
| 38 | Obesity         |             |             |             |             |        |   |
| 39 |                 |             |             |             |             |        |   |
| 40 | (%)             | 12.7        | 11.5        | 10.3        | 18.5        | p>.05  | ↗ |
| 41 |                 |             |             |             |             |        |   |
| 42 | (95% CI)        | 9.6, 16.7   | 10.0, 13.2  | 8.6, 12.4   | 15.5, 21.9  |        |   |

↗ = increasing); ↘ = decreasing; → = stable; CI = confidence interval; p = significance level

284

285 Table 3 shows the results for the 11 countries with only three data points. The periods covered

286 by these surveys range from 10 years in Lesotho and Nigeria to 17 years in Senegal and Ivory

287 Coast. Some of the earliest surveys in these countries occurred in the 2000s and given

288 differences in timing and duration between the earliest and latest surveys, it made sense to



289 report these surveys separately. Lesotho has the highest prevalence of overweight, which  
 290 stood at 32% in 2004 and has barely changed over the subsequent 10-year period. Namibia and  
 291 Cameroon also had high levels of overweight at more than 20%. On the other hand,  
 292 Madagascar and Ethiopia had the lowest levels of overweight and obesity. In Madagascar and  
 293 Ethiopia, overweight is varied between 7 and 12% over the period covered by the surveys,  
 294 while obesity is under 5% (under 2% in Madagascar). The change of overweight over time was  
 295 statistically significant only in Guinea, Mozambique, Namibia and Chad, while obesity was  
 296 significant only in Senegal, Guinea and Cameroon.

**Table 3: Analysis of trends in overweight and obesity for countries with three data points**

| Country            |             |             |             | <i>p</i>      | Nature of trend |
|--------------------|-------------|-------------|-------------|---------------|-----------------|
| <b>Senegal</b>     | <b>1993</b> | <b>2005</b> | <b>2010</b> |               |                 |
| Overweight         |             |             |             |               |                 |
| (%)                | 18.8        | 21.9        | 21.6        | <i>p</i> >.05 | →               |
| (95% CI)           | 16.3, 21.6  | 17.0, 27.6  | 18.2, 25.4  |               |                 |
| Obesity            |             |             |             |               |                 |
| (%)                | 8.5         | 12.8        | 15.2        | <i>p</i> <.05 | ↗               |
| (95% CI)           | 6.7, 10.8   | 9.5, 17.1   | 11.9, 19.3  |               |                 |
| <b>Ivory Coast</b> | <b>1994</b> | <b>1998</b> | <b>2011</b> |               |                 |
| Overweight         |             |             |             |               |                 |
| (%)                | 18.4        | 18.8        | 24.9        | <i>p</i> >.05 | →               |
| (95% CI)           | 16.1, 20.8  | 16.1, 21.7  | 21.4, 28.8  |               |                 |
| Obesity            |             |             |             |               |                 |
| (%)                | 6.9         | 9.0         | 11.8        | <i>p</i> >.05 | →               |
| (95% CI)           | 5.1, 9.2    | 7.1, 11.4   | 9.1, 15.1   |               |                 |
| <b>Cameroon</b>    | <b>1998</b> | <b>2004</b> | <b>2011</b> |               |                 |
| Overweight         |             |             |             |               |                 |
| (%)                | 24.7        | 27.0        | 26.7        | <i>p</i> >.05 | →               |
| (95% CI)           | 21.3, 28.3  | 23.8, 30.5  | 23.9, 29.3  |               |                 |
| Obesity            |             |             |             |               |                 |
| (%)                | 9.3         | 10.9        | 16.1        | <i>p</i> >.05 | ↗               |
| (95% CI)           | 6.7, 12.8   | 8.9, 13.4   | 14.1, 18.4  |               |                 |
| <b>Ethiopia</b>    | <b>2000</b> | <b>2005</b> | <b>2011</b> |               |                 |
| Overweight         |             |             |             |               |                 |
| (%)                | 9.5         | 11.7        | 12.5        | <i>p</i> >.05 | →               |
| (95% CI)           | 6.9, 12.9   | 7.5, 18.0   | 9.2, 16.8   |               |                 |

1  
2  
3  
4  
5  
6  
7  
8  
9  
10  
11  
12  
13  
14  
15  
16  
17  
18  
19  
20  
21  
22  
23  
24  
25  
26  
27  
28  
29  
30  
31  
32  
33  
34  
35  
36  
37  
38  
39  
40  
41  
42  
43  
44  
45  
46  
47  
48  
49  
50  
51  
52  
53  
54  
55  
56  
57  
58  
59  
60

|                   |             |             |             |       |   |
|-------------------|-------------|-------------|-------------|-------|---|
| Obesity (%)       | 1.0         | 2.9         | 3.6         | p<.05 | ↗ |
| (95% CI)          | 0.5, 1.7    | 1.5, 5.8    | 2.3, 5.4    |       |   |
| <b>Guinea</b>     | <b>1999</b> | <b>2005</b> | <b>2012</b> |       |   |
| Overweight (%)    | 18.2        | 17.8        | 25.4        | p<.05 | ↗ |
| (95% CI)          | 15.7, 21.0  | 14.3, 22.0  | 20.9, 30.4  |       |   |
| Obesity (%)       | 6.2         | 7.9         | 9.4         | p<.05 | ↗ |
| (95% CI)          | 4.8, 7.9    | 4.6, 13.3   | 6.9, 12.8   |       |   |
| <b>Lesotho</b>    | <b>2004</b> | <b>2009</b> | <b>2014</b> |       |   |
| Overweight (%)    | 32.0        | 30.0        | 29.7        | p>.05 | → |
| (95% CI)          | 25.3, 39.5  | 23.3, 37.7  | 22.9, 37.4  |       |   |
| Obesity (%)       | 21.9        | 25.8        | 20.3        | p>.05 | → |
| (95% CI)          | 15.5, 30.0  | 20.1, 32.4  | 14.7, 27.4  |       |   |
| <b>Madagascar</b> | <b>1997</b> | <b>2003</b> | <b>2008</b> |       |   |
| Overweight (%)    | 7.3         | 8.3         | 10.5        | p>.05 | → |
| (95% CI)          | 5.2, 10.1   | 6.6, 10.5   | 8.1, 13.5   |       |   |
| Obesity (%)       | 1.1         | 3.4         | 1.9         | p>.05 | → |
| (95% CI)          | 0.5, 2.6    | 2.4, 4.8    | 1.0, 3.5    |       |   |
| <b>Mozambique</b> | <b>1997</b> | <b>2003</b> | <b>2011</b> |       |   |
| Overweight (%)    | 11.1        | 15.1        | 16.0        | p<.05 | ↗ |
| (95% CI)          | 8.4, 14.6   | 13.1, 19.1  | 14.1, 18.2  |       |   |
| Obesity (%)       | 4.0         | 3.2         | 6.3         | p>.05 | → |
| (95% CI)          | 2.3, 6.9    | 2.0, 5.1    | 4.7, 8.6    |       |   |
| <b>Nigeria</b>    | <b>2003</b> | <b>2008</b> | <b>2013</b> |       |   |
| Overweight (%)    | 19.7        | 24.3        | 25.2        | p>.05 | → |
| (95% CI)          | 15.2, 25.1  | 22.6, 26.1  | 23.4, 27.1  |       |   |
| Obesity (%)       | 11.5        | 11.0        | 11.5        | p>.05 | → |
| (95% CI)          | 8.3, 15.6   | 9.7, 12.5   | 10.3, 12.7  |       |   |
| <b>Namibia</b>    | <b>1992</b> | <b>2006</b> | <b>2013</b> |       |   |
| Overweight (%)    | 21.4        | 22.6        | 21.5        | p>.05 | → |
| (95% CI)          | 17.9, 25.4  | 19.2, 26.5  | 18.0, 25.4  |       |   |
| Obesity (%)       | 12.7        | 18.9        | 18.6        | p<.05 | ↗ |

22

|             |             |             |             |       |   |
|-------------|-------------|-------------|-------------|-------|---|
| (95% CI)    | 10.3, 15.6  | 16.1, 22.1  | 15.2, 22.5  |       |   |
| <b>Chad</b> | <b>1996</b> | <b>2004</b> | <b>2014</b> |       |   |
| Overweight  |             |             |             |       |   |
| (%)         | 10.4        | 14.9        | 16.6        | p<.05 | ↗ |
| (95% CI)    | 9.6,11.4    | 12.4, 17.7  | 13.9, 19.6  |       |   |
| Obesity     |             |             |             |       |   |
| (%)         | 3.8         | 5.7         | 6.5         | p<.05 | ↗ |
| (95% CI)    | 2.9,4.1     | 3.9, 8.4    | 4.8, 8.7    |       |   |

↗ = increasing); ↘ = decreasing; → = stable; CI = confidence interval; p = significance level

297

298 The Figure 1 below depicts the increasing trends of overweight and obesity in all the 24  
 299 countries included in the analysis, except in Lesotho where there is semblance of a decrease.

300

301 **Figure 1: Time trends of overweight and obesity**

302

303

304

305

306 **Countries:** BF= Burkina Faso; BJ= Benin; CI=Ivory Coast; CM= Cameroon; EG= Egypt; ET=Ethiopia; GH= Ghana; GN=  
 307 Guinea; KE= Kenya; LS= Lesotho; MD= Madagascar; ML= Mali; MW= Malawi; MZ= Mozambique; NG= Nigeria; NI=  
 308 Niger; NM= Namibia; RW= Rwanda; SN= Senegal; TD = Chad; TZ= Tanzania; UG= Uganda; ZM=Zambia; ZW=  
 309 Zimbabwe

310

311

312

22

1  
2  
3 313 **Discussion**  
4  
5

6 314 We set out to investigate the prevalence and time trends in overweight and obesity between  
7  
8 315 1991 and 2014 in 24 African countries. Primarily, we confirm that the prevalence of overweight  
9  
10 316 and obesity among urban women has rapidly increased in the past two and a half decades. All  
11  
12 317 24 countries included in our analyses experienced an increase in overweight and obesity over  
13  
14 318 the time period under consideration. However, the increase was only statistically significant in  
15  
16 319 17 of the 24 countries in the case of obesity and 13 out of the 24 for overweight. The changes  
17  
18 320 over time were particularly noticeable among countries with 4 or more survey data points, in  
19  
20 321 which case, all the 13 countries showed a statistically significant increase in obesity, while 10  
21  
22 322 showed significant increase for overweight during the period of the study. For countries with  
23  
24 323 three data points, only 4 of the 11 countries had a significant increase for overweight and 3 for  
25  
26 324 obesity. This suggests that length of time (number of data points) plays a role in understanding  
27  
28 325 the changes in overweight and obesity over time. We also found that 18 of the 24 countries had  
29  
30 326 an overweight prevalence above 20%, based on the most recent survey waves for the  
31  
32 327 respective countries. This was not the case in the earlier surveys where only 6 countries had an  
33  
34 328 overweight prevalence of 20% or above. Four countries of the 24 had an obesity prevalence  
35  
36 329 that was above 20%, with the prevalence in the rest ranging between 10% and 19% based on  
37  
38 330 the latest surveys. However, in the earlier surveys, only one country had obesity prevalence of  
39  
40 331 20% or more, while the rest had obesity rate ranging from 1 to 12%. This points to worsening  
41  
42 332 phenomenon of obesity among urban women in the past two and half decades. Another key  
43  
44 333 finding is that in most of the countries included in our analyses, obesity increased alongside  
45  
46 334 overweight. This is not unexpected, as women who are overweight (also known as pre-obesity)  
47  
48  
49  
50  
51  
52  
53  
54  
55  
56  
57  
58  
59  
60

1  
2  
3 335 are naturally likely to become obese if efforts are not made by such women to control their  
4  
5  
6 336 weight. Thus, addressing overweight may, to a larger extent curtail incidence of obesity.  
7  
8

9 337  
10  
11  
12 338 Focusing on individual countries, we found significant differences in overweight and obesity  
13  
14 339 across the countries included in the analysis. For example, in the most recent surveys, Egypt has  
15  
16  
17 340 the highest prevalence of overweight (44%) and obesity (39%) by far, followed by Ghana with  
18  
19 341 an overweight prevalence of 30% and obesity of 22%. Niger (32%) and Rwanda (31%) were two  
20  
21 342 other countries with overweight prevalence of 30% and above. The results on Egypt are not  
22  
23 343 surprising as the country was previously ranked among the countries in the world with the most  
24  
25 344 obese people (35). The results in Ghana are also consistent with previous findings (15). Egypt  
26  
27 345 and Ghana also experienced a significant increase in overweight and obesity in the past two and  
28  
29 346 half decades. Obesity increased by 65% (7.7% to 22%) in Ghana and by 12% (34% to 39%) in  
30  
31 347 Egypt. Similarly, increase in obesity doubled in Kenya, Benin, Niger, Rwanda, Ivory Coast and  
32  
33 348 Uganda, while tripled in Zambia, Burkina Faso, Mali, Malawi and Tanzania. Thus, while the  
34  
35 349 prevalence of obesity in the aforementioned countries may be considered lower than that of  
36  
37 350 Egypt and Ghana, the increment overtime has been doubling or tripling in rates. This suggests  
38  
39 351 that in the next decades, the obesity rates in these countries may catch up with Egypt and  
40  
41 352 Ghana, which are currently leading in terms of the level of prevalence of both overweight and  
42  
43 353 obesity. However, overweight and obesity did not show any significant changes over time in  
44  
45 354 Cameroon, Lesotho, Madagascar and Nigeria. Ethiopia and Madagascar had the lowest  
46  
47 355 prevalence of both obesity and overweight. Similar findings were obtained in Ethiopia and  
48  
49 356 Madagascar in a recent study using the DHS data from 32 African countries (29).  
50  
51  
52  
53  
54  
55  
56  
57  
58  
59  
60

1  
2  
3 357 The increasing prevalence and trends of overweight and obesity in Africa may be attributed  
4  
5  
6 358 largely to rapid urbanization taking place in the continent and its associated nutritional  
7  
8  
9 359 transition. For example, in 2010, the share of the African urban population was about 36% and  
10  
11 360 is projected to increase to 50% and 60% by 2030 and 2050 respectively (36). Using Ghana as a  
12  
13 361 case in point, for the first time, the Ghana Population and Housing Census shows that a little  
14  
15  
16 362 over half (50.9%) of country's population live in urban areas compared to rural areas (37). The  
17  
18 363 growing urbanization comes along with lifestyle changes such as decreased physical activity and  
19  
20  
21 364 increase supply of high caloric fast foods and sugar sweetened beverages (16, 38-40). Indeed,  
22  
23 365 sedentary lifestyle and high consumption of energy dense diets are found to account for the  
24  
25  
26 366 increasing burden of overweight and obesity in urban settings of the low and middle income  
27  
28 367 countries (LMIC) (21-23). The consequences of which, is increase in non-communicable  
29  
30  
31 368 diseases (NCDs), as there is substantial evidence that the risk of NCDs such as coronary heart  
32  
33 369 disease, ischemic stroke and type 2 diabetes mellitus increases steadily with increasing body  
34  
35  
36 370 mass index (BMI) (3, 4, 40). In addition, an increased burden of disability-adjusted life years  
37  
38 371 (DALYs) is associated with overweight and obesity (3). It is imperative that strategies be  
39  
40  
41 372 implemented to address the problem of overweight and obesity, thereby curbing associated  
42  
43 373 NCD risk in urban Africa. Addressing the issue of overweight and obesity will be an important  
44  
45  
46 374 step towards curbing the surge of NCDs the continent is currently experiencing, which is likely  
47  
48  
49 375 to surpass the toll of sickness and death from infectious diseases by 2030 (41). This will further  
50  
51 376 contribute greatly to the potential for African countries to achieve Sustainable Development  
52  
53 377 Goals (SDG 3.4): reducing by one third premature mortality from non-communicable diseases  
54  
55  
56 378 through prevention, and treatment, and promote mental health and wellbeing by 2030 (42).  
57  
58  
59  
60

1  
2  
3 379 In the light of the findings of our study and the literature discussed above, we particularly  
4  
5  
6 380 advocate for targeted interventions to address the incidence of overweight and obesity among  
7  
8  
9 381 urban dwelling women. Intervention strategies, described in the literature as ‘effective and  
10  
11 382 essential’ (43) in addressing overweight and obesity in a developing country context include,  
12  
13 383 policy interventions and inter-sectoral partnerships; addressing food system drivers of caloric  
14  
15  
16 384 over-consumption; and improving eating and physical activity environments in key community  
17  
18  
19 385 settings (43). It is believed that effective implementation of these strategies has the potential to  
20  
21 386 curtail the incidence of overweight and obesity. It is important to recognize that large  
22  
23  
24 387 inequalities remain a major issue in many African countries, which may have a bearing on areas  
25  
26 388 that ought to be prioritized and targeted for interventions. For example, in many African  
27  
28  
29 389 countries, it is common to see problems of undernutrition alongside increasing rates of  
30  
31 390 overweight and obesity. This “dual burden” of undernutrition and obesity exists not only at  
32  
33  
34 391 country- or community-level, but all the way down to households (16, 44). Undernutrition  
35  
36 392 persists as a significant problem (45) in many African countries, and interventions have been  
37  
38  
39 393 put in place to address it (46-48). However, the issue of overweight and obesity has not  
40  
41 394 received adequate attention as yet in Africa (16, 48). More attention of policy makers and  
42  
43  
44 395 public health practitioners on ways to address the overweight and obesity epidemic, taking into  
45  
46 396 account undernutrition is warranted.

### 49 **Strengths and limitations**

50  
51  
52 398 The key strength of this study is the use of nationally representative data sets, thereby  
53  
54  
55 399 providing more robust estimates of the prevalence and trends of overweight and obesity in the  
56  
57  
58 400 respective countries. Further, height and weight as used in the calculation of BMI, was

1  
2  
3 401 objectively measured by well-trained technicians, reducing possible misclassification of  
4  
5  
6 402 overweight and obesity. The study is also associated with some limitations. To maintain sample  
7  
8  
9 403 comparability over time, we had to limit our sample to women with children under 5 years old.  
10  
11 404 This may, to some extent, affect the generalizability of the findings, as the sample may not be  
12  
13 405 representative of the entire female population. Another limitation is the cross-sectional nature  
14  
15  
16 406 of the data. Because the surveys used in this analysis were conducted at different times across  
17  
18  
19 407 countries, we were unable to estimate the change in BMI across all countries for the entire  
20  
21 408 survey period. Lack of uniformity in the definition of urban and rural settings may also affect  
22  
23 409 the comparability of the findings across countries, since different countries have different  
24  
25  
26 410 definitions of what constitutes urban versus rural. Lastly, one methodological limitation is that  
27  
28  
29 411 we pooled the data to perform the trend analysis, which may lead to an overestimation of  
30  
31 412 statistical power. To address this limitation, the weight in the pooled data was divided by the  
32  
33  
34 413 number of surveys available for the country.

## 35 36 37 414 **Conclusions**

38  
39  
40 415 The study provided clear evidence of increase in overweight and obesity among women in the  
41  
42 416 urban settings of all the countries included in the analysis, with the increase overtime being  
43  
44  
45 417 statistically significant in 17 of the 24 countries in the case of obesity and 13 out of the 24 for  
46  
47  
48 418 overweight. We have supported the finding that women dwelling in urban settings are prone  
49  
50 419 to overweight and obesity. The prevalence of obesity increased more than two fold in most  
51  
52 420 countries and more than three fold in others. The prevalence of obesity increased alongside  
53  
54  
55 421 overweight. These findings call for deliberate strategies and interventions by policy makers,  
56  
57  
58 422 politicians and health promotion experts, focusing on healthy diet, physical activity, weight



1  
2  
3 423 reduction and maintenance strategies in African countries, particularly in urban areas to curb  
4  
5  
6 424 the growing proportion of unhealthy weight women of child bearing age in urban Africa.  
7  
8  
9 425 Strategies should include measures such as price reduction for healthy foods (e.g., fruits and  
10  
11 426 vegetables) and promotion of physical activity. For future research, we suggest the conduct of  
12  
13 427 longitudinal studies to systematically elucidate cumulative changes in individual's BMI over  
14  
15  
16 428 time. Longitudinal studies will also be able to ascertain the extent to which overweight can lead  
17  
18 429 to mild-to-moderate obesity.  
19

20  
21  
22 43023  
24  
25 43126  
27  
28 43229  
30  
31 43332  
33  
34 43435  
36  
37 43538  
39  
40 43641  
42  
43 43744  
45  
46 43847  
48  
49 43950  
51  
52 44053  
54  
55 441

1  
2  
3 442 **Acknowledgements**  
4  
5

6 443 We wish to express our profound gratitude to The DHS Program, USA for providing us access to  
7  
8  
9 444 the data. We also wish to acknowledge institutions of respective countries that played critical  
10  
11  
12 445 roles in the data collection process.  
13

14  
15 446

16  
17  
18 447 **Competing Interest**  
19

20  
21 448 The authors have no competing interests to declare.  
22  
23

24 449 **Funding**  
25

26  
27  
28 450 This study did not receive funding from any source.  
29  
30

31 451 **Data Sharing Statement**  
32

33  
34 452 This study was a re-analysis of existing data that are publicly available from The DHS Program at  
35  
36 453 <http://dhsprogram.com/publications/publication-fr221-dhs-final-reports.cfm>. Data are  
37  
38  
39 454 accessible free of charge upon a registration with the Demographic and Health Survey program  
40  
41  
42 455 (The DHS Program). The registration is done on the DHS website indicated above.  
43  
44

45 456 **Authors' Contribution**  
46

47  
48 457 DAA conceived and designed the study, interpreted the results, wrote the first draft of the  
49  
50  
51 458 manuscript, and contributed to revision of the manuscript. DAA and ZTD analysed the data. ZTD  
52  
53 459 contributed to the drafting of the analytical strategy. ZTD, SM BM and ACE contributed to  
54  
55  
56  
57  
58  
59  
60

1  
2  
3 460 study design, data interpretation, and critical revision of the manuscript. All authors take  
4  
5  
6 461 responsibility of any issues that might arise from the publication of this manuscript.  
7  
8  
9 462  
10  
11 463  
12  
13 464  
14  
15  
16  
17 465  
18  
19 466  
20  
21  
22 467  
23  
24 468  
25  
26  
27 469  
28  
29 470  
30  
31  
32 471  
33  
34 472  
35  
36  
37 473  
38  
39 474  
40  
41  
42 475  
43  
44  
45 476  
46  
47 477  
48  
49  
50 478  
51  
52 479  
53  
54  
55 480  
56  
57 481  
58  
59  
60

For peer review only

482 **References**

- 483
- 484 1. Wang Y, Chen HJ, Shaikh S, Mathur P. Is obesity becoming a public health problem in India?  
485 Examine the shift from under- to overnutrition problems over time *Obes Rev* 2009;10(4):456-74.
- 486 2. Martorell R, Khan LK, Hughes ML, Grummer-Strawn LM. Obesity in women from developing  
487 countries. *Eur J Clin Nutr*. 2000;54.
- 488 3. World Health Organization. Obesity. Situation and trends: Global Health Observatory (GHO) data  
489 2016 [cited 2017 01.02]. Available from: [http://www.who.int/gho/ncd/risk\\_factors/obesity\\_text/en/](http://www.who.int/gho/ncd/risk_factors/obesity_text/en/).
- 490 4. Mokdad AH, Ford ES, Bowman BA et al. Prevalence of obesity, diabetes, and obesity-related  
491 health risk factors *JAMA*. 2003;289(1):76-9.
- 492 5. PubMed Health. Excess body fat now linked to 13 different types of cancer: PubMed Health;  
493 [cited 2017 02.02]. Available from:  
494 [https://www.ncbi.nlm.nih.gov/pubmedhealth/behindtheheadlines/news/2016-08-25-excess-body-fat-  
495 now-linked-to-13-different-types-of-cancer/](https://www.ncbi.nlm.nih.gov/pubmedhealth/behindtheheadlines/news/2016-08-25-excess-body-fat-now-linked-to-13-different-types-of-cancer/).
- 496 6. Leddy MA, Power ML, Schulkin J. The impact of maternal obesity on maternal and fetal health  
497 *Rev Obstet Gynecol* 2008;1(4):170-8.
- 498 7. Lash MM, Armstrong A. Impact of obesity on women's health. *Fertil Steril*. 2009;91(5):1712-6.
- 499 8. Lynch CM, Sexton DJ, Hession M, Morrison JJ. Obesity and mode of delivery in primigravid and  
500 multigravid women *Am J Perinatol*. 2008;25(3):163-7.
- 501 9. Arianas EA, Rankin KM, Norr KF, White-Traut RC. Maternal weight status and responsiveness to  
502 preterm infant behavioral cues during feeding *BMC Pregnancy Childbirth*. 2017;17(1):113.
- 503 10. Haycraft EL, Blissett JM. Maternal and paternal controlling feeding practices: reliability and  
504 relationships with BMI *Obesity (Silver Spring)*. 2008;16(7):1552-8.
- 505 11. Rising R, Lifshitz F. Relationship between maternal obesity and infant feeding-interactions *Nutr*  
506 *J*. 2005;4:17.
- 507 12. Mendez MA, Monteiro CA, Popkin BM. Overweight exceeds underweight among women in  
508 most developing countries *Am J Clin Nutr*. 2005;81(3):714-21.
- 509 13. Kinnunen TI, Neupane S. Prevalence of overweight among women of childbearing age in Nepal:  
510 trends from 2001 to 2011 and associations with socio-demographic factors *Matern Child Health J*.  
511 2014;18(8):1846-53.
- 512 14. Razak F, Corsi DJ, Slutsky AS, Kurpad A, Berkman L, Laupacis A, et al. Prevalence of Body Mass  
513 Index Lower Than 16 Among Women in Low- and Middle-Income Countries *JAMA*. 2015;314(20):2164-  
514 71.
- 515 15. Ofori-Asenso R, Agyeman AA, Laar A, Boateng D. Overweight and obesity epidemic in Ghana-a  
516 systematic review and meta-analysis *BMC Public Health*. 2016;16(1):1239.
- 517 16. Popkin BM, Adair LS, Ng SW. Global nutrition transition and the pandemic of obesity in  
518 developing countries *Nutr Rev* 2012;70(1):3-21.
- 519 17. Neuman M, Kawachi I, Gortmaker S, Subramanian SV. Urban-rural differences in BMI in low- and  
520 middle-income countries: the role of socioeconomic status *Am J Clin Nutr* 2013;97(2):428-36.
- 521 18. Neuman M, Kawachi I, Gortmaker S, Subramanian SV. Urban-rural differences in BMI in low- and  
522 middle-income countries: the role of socioeconomic status *Am J Clin Nutr*. 2013;97(2):428-36.
- 523 19. Yadav K, Krishnan A. Changing patterns of diet, physical activity and obesity among urban, rural  
524 and slum populations in north India *Obes Rev* 2008;9(5):400-8.
- 525 20. World Health Organization. Obesity and overweight 2016 [cited 2017 03.04]. Available from:  
526 <http://www.who.int/mediacentre/factsheets/fs311/en/>.

- 1  
2  
3 527 21. Ziraba AK, Fotso JC, Ochako R. Overweight and obesity in urban Africa: A problem of the rich or  
4 528 the poor? . BMC Public Health. 2009;9(1):1-9.
- 5 529 22. Abrha S, Shiferaw S, Ahmed KY. Overweight and obesity and its socio-demographic correlates  
6 530 among urban Ethiopian women: evidence from the 2011 EDHS BMC Public Health. 2016;636.
- 7 531 23. Tebekaw Y, Teller C, Colón-Ramos U. The burden of underweight and overweight among women  
8 532 in Addis Ababa, Ethiopia BMC Public Health 2014;14:1126.
- 9 533 24. Subramanian SV, Perkins JM, Özaltin E, Davey Smith G. Weight of nations: a socioeconomic  
10 534 analysis of women in low- to middle-income countries Am J Clin Nutr. 2011;93(2):413-21.
- 11 535 25. Monteiro CA, Conde WL, Lu B ea. Obesity and inequities in health in the developing world Int J  
12 536 Obes Relat Metab Disord. 2004;28(9):1181-6.
- 13 537 26. Jones-Smith JC, Gordon-Larsen P, Siddiqi A, Popkin BM. Is the burden of overweight shifting to  
14 538 the poor across the globe? Time trends among women in 39 low- and middle-income countries (1991-  
15 539 2008). Int J Obes 2012;36(8):1114-20.
- 16 540 27. Kimani-Murage EW, Muthuri SK, Oti SO, Mutua MK, van de Vijver S, Kyobutungi C. Evidence of a  
17 541 Double Burden of Malnutrition in Urban Poor Settings in Nairobi, Kenya PLoS ONE. 2015;10(6).
- 18 542 28. Adeboye B, Bermanno G, Rolland C. Obesity and its health impact in Africa: a systematic review.  
19 543 Cardiovasc J Afr. 2012;23(9):512-21.
- 20 544 29. Neupane S, Prakash KC, Doku DT. Overweight and obesity among women: analysis of  
21 545 demographic and health survey data from 32 Sub-Saharan African Countries BMC Public Health.  
22 546 2016;16:30.
- 23 547 30. The DHS Program. Demographic and Health Surveys [cited 2017 02.02]. Available from:  
24 548 [https://dhsprogram.com/data/dataset\\_admin/download-datasets.cfm](https://dhsprogram.com/data/dataset_admin/download-datasets.cfm).
- 25 549 31. The DHS Program. DHS Methodology [cited 2017 02.02]. Available from:  
26 550 <http://dhsprogram.com/What-We-Do/Survey-Types/DHS-Methodology.cfm>.
- 27 551 32. Shireen A, Kothari MT, Pullum T. An Assessment of the Quality of DHS Anthropometric Data,  
28 552 2005-2014. DHS Methodological Reports No. 16 Rockville, Maryland, USA: ICF International, 2015.
- 29 553 33. Eknoyan G. Adolphe Quetelet (1796 –1874) - the average man and indices of obesity . Nephrol  
30 554 Dial Transplant 2008;23:47-51.
- 31 555 34. World Health Organization. BMI classification: WHO; 2006 [cited 2017 02.02]. Available from:  
32 556 [http://apps.who.int/bmi/index.jsp?introPage=intro\\_3.html](http://apps.who.int/bmi/index.jsp?introPage=intro_3.html).
- 33 557 35. Murray CTL, Ng M. Nearly one-third of the world's population is obese or overweight, new data  
34 558 show 2016 [cited 2017 3.4]. Available from: [http://www.healthdata.org/news-release/nearly-one-third-  
35 559 world%E2%80%99s-population-obese-or-overweight-new-data-show](http://www.healthdata.org/news-release/nearly-one-third-world%E2%80%99s-population-obese-or-overweight-new-data-show).
- 36 560 36. African Development Bank. Urbanization in Africa 2012 [cited 2017 5.4]. Available from:  
37 561 [https://www.afdb.org/en/blogs/afdb-championing-inclusive-growth-across-africa/post/urbanization-in-  
38 562 africa-10143/](https://www.afdb.org/en/blogs/afdb-championing-inclusive-growth-across-africa/post/urbanization-in-africa-10143/).
- 39 563 37. Ghana Statistical Service (GHS). Population and housing census: summary report of final results.  
40 564 Accra: GHS, 2012.
- 41 565 38. Duda RB, Dark R, Seffah J, Adanu RMK, Anarfi JK, Hill AG. Prevalence of Obesity in Women of  
42 566 Accra, Ghana Afr J Health Sci 2007;14:154-59.
- 43 567 39. Abubakari AR, Lauder W, Jones MC, Kirk A, Agyemang C, Bhopal RS. Prevalence and time trends  
44 568 in diabetes and physical inactivity among adult West African populations: the epidemic has arrived  
45 569 Public Health. 2009;123(9):602-14.
- 46 570 40. Mohan V, Mathur P, Deepa R, Deepa M, Shukla DK, Menon GR, et al. Urban rural differences in  
47 571 prevalence of self-reported diabetes in India--the WHO-ICMR Indian NCD risk factor surveillance  
48 572 Diabetes Res Clin Pract 2008;80(1):159-68.
- 49 573 41. Organization WH. Research shows higher risk of developing Non-communicable diseases in  
50 574 Africa: WHO; 2016 [cited 2017 16.02]. Available from: <http://www.afro.who.int/en/media->

- 1  
2  
3 575 [centre/pressreleases/item/9285-research-shows-higher-risk-of-developing-non-communicable-](http://www.who.int/mediacentre/pressreleases/item/9285-research-shows-higher-risk-of-developing-non-communicable-diseases-in-africa.html)  
4 576 [diseases-in-africa.html](http://www.who.int/mediacentre/pressreleases/item/9285-research-shows-higher-risk-of-developing-non-communicable-diseases-in-africa.html).  
5 577 42. United Nations. Resolution adopted by the General Assembly on 25 September 2015--  
6 578 Transforming our world: the 2030 Agenda for Sustainable Development 2015 [cited 2017 16.02].  
7 579 Available from: [http://www.un.org/ga/search/view\\_doc.asp?symbol=A/RES/70/1&Lang=E](http://www.un.org/ga/search/view_doc.asp?symbol=A/RES/70/1&Lang=E).  
8 580 43. Kumanyika S, Libman K, Garcia A. strategic action to combat the obesity epidemic. Report of the  
9 581 Obesity Working Group 2013 2013 [cited 2017 28.7]. Available from: [http://www.wish-](http://www.wish-qatar.org/app/media/383)  
10 582 [qatar.org/app/media/383](http://www.wish-qatar.org/app/media/383).  
11 583 44. Popkin BM. The nutrition transition and obesity in the developing world J Nutr  
12 584 2001;131(3):871S-3S.  
13 585 45. Mendez MA, Monteiro CA, Popkin BM. Overweight exceeds underweight among women in  
14 586 most developing countries Am J Clin Nutr 2005;81(3):714-21.  
15 587 46. Bosu WK. An overview of the nutrition transition in West Africa: implications for non-  
16 588 communicable diseases Proc Nutr Soc 2015;74(4):466-77.  
17 589 47. Jaacks LM, Slining MM, Popkin BM. Recent underweight and overweight trends by rural-urban  
18 590 residence among women in low- and middle-income countries J Nutr 2015;145(2):352-7.  
19 591 48. Fanzo J. The Nutrition Challenge in Sub-Saharan Africa. Working paper Rome, Italy.: UNDP  
20 592 Regional Bureau for Africa 2012 [cited 2017 28.7]. Available from:  
21 593 <http://www.undp.org/content/dam/rba/docs/Working%20Papers/Nutrition%20Challenge.pdf>.  
22  
23  
24  
25  
26 594  
27  
28  
29  
30  
31  
32  
33  
34  
35  
36  
37  
38  
39  
40  
41  
42  
43  
44  
45  
46  
47  
48  
49  
50  
51  
52  
53  
54  
55  
56  
57  
58  
59  
60

1  
2  
3  
4  
5  
6  
7  
8  
9  
10  
11  
12  
13  
14  
15  
16  
17  
18  
19  
20  
21  
22  
23  
24  
25  
26  
27  
28  
29  
30  
31  
32  
33  
34  
35  
36  
37  
38  
39  
40  
41  
42  
43  
44  
45  
46  
47  
48  
49  
50  
51  
52  
53  
54  
55  
56  
57  
58  
59  
60

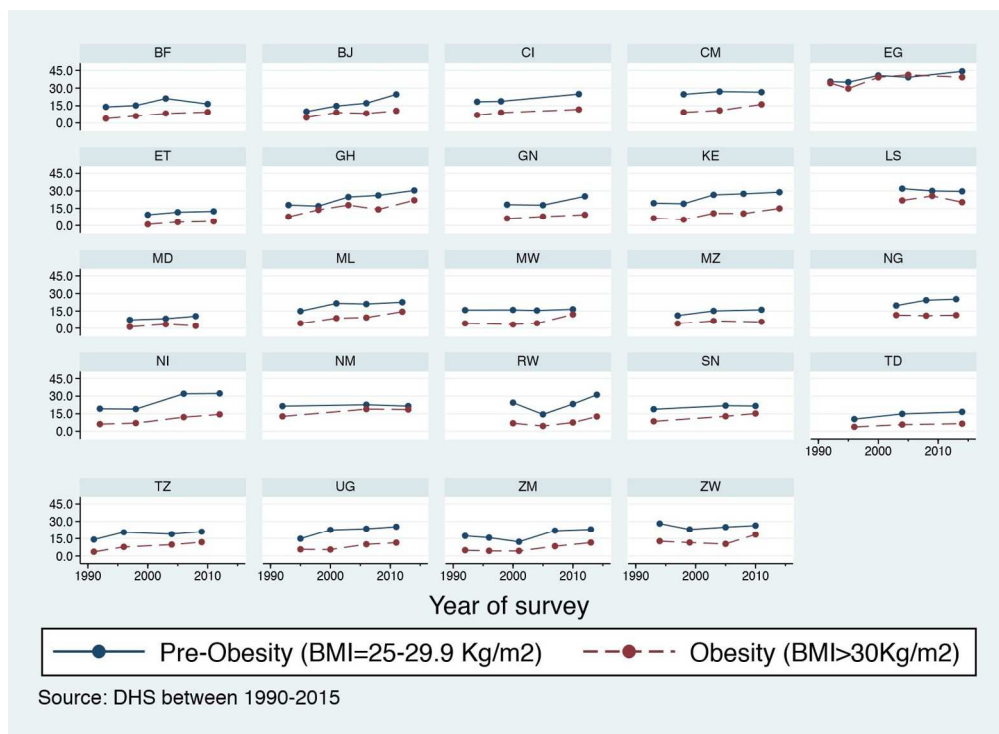

139x101mm (300 x 300 DPI)

ew only

**STROBE 2007 (v4) checklist of items to be included in reports of observational studies in epidemiology\***  
**Checklist for cohort, case-control, and cross-sectional studies (combined)**

| Section/Topic             | Item # | Recommendation                                                                                                                                                                                                                                                                                                                                                                                                                                                         | Reported on page # |
|---------------------------|--------|------------------------------------------------------------------------------------------------------------------------------------------------------------------------------------------------------------------------------------------------------------------------------------------------------------------------------------------------------------------------------------------------------------------------------------------------------------------------|--------------------|
| Title and abstract        | 1      | (a) Indicate the study's design with a commonly used term in the title or the abstract                                                                                                                                                                                                                                                                                                                                                                                 | 2                  |
|                           |        | (b) Provide in the abstract an informative and balanced summary of what was done and what was found                                                                                                                                                                                                                                                                                                                                                                    | 2-3                |
| <b>Introduction</b>       |        |                                                                                                                                                                                                                                                                                                                                                                                                                                                                        |                    |
| Background/rationale      | 2      | Explain the scientific background and rationale for the investigation being reported                                                                                                                                                                                                                                                                                                                                                                                   | 5-7                |
| Objectives                | 3      | State specific objectives, including any pre-specified hypotheses                                                                                                                                                                                                                                                                                                                                                                                                      | 7                  |
| <b>Methods</b>            |        |                                                                                                                                                                                                                                                                                                                                                                                                                                                                        |                    |
| Study design              | 4      | Present key elements of study design early in the paper                                                                                                                                                                                                                                                                                                                                                                                                                | 8                  |
| Setting                   | 5      | Describe the setting, locations, and relevant dates, including periods of recruitment, exposure, follow-up, and data collection                                                                                                                                                                                                                                                                                                                                        | 8-11               |
| Participants              | 6      | (a) <i>Cohort study</i> —Give the eligibility criteria, and the sources and methods of selection of participants. Describe methods of follow-up<br><i>Case-control study</i> —Give the eligibility criteria, and the sources and methods of case ascertainment and control selection. Give the rationale for the choice of cases and controls<br><i>Cross-sectional study</i> —Give the eligibility criteria, and the sources and methods of selection of participants | 9                  |
|                           |        | (b) <i>Cohort study</i> —For matched studies, give matching criteria and number of exposed and unexposed<br><i>Case-control study</i> —For matched studies, give matching criteria and the number of controls per case                                                                                                                                                                                                                                                 |                    |
| Variables                 | 7      | Clearly define all outcomes, exposures, predictors, potential confounders, and effect modifiers. Give diagnostic criteria, if applicable                                                                                                                                                                                                                                                                                                                               |                    |
| Data sources/ measurement | 8*     | For each variable of interest, give sources of data and details of methods of assessment (measurement). Describe comparability of assessment methods if there is more than one group                                                                                                                                                                                                                                                                                   | 8-11               |
| Bias                      | 9      | Describe any efforts to address potential sources of bias                                                                                                                                                                                                                                                                                                                                                                                                              | 9                  |
| Study size                | 10     | Explain how the study size was arrived at                                                                                                                                                                                                                                                                                                                                                                                                                              | 9                  |
| Quantitative variables    | 11     | Explain how quantitative variables were handled in the analyses. If applicable, describe which groupings were chosen and why                                                                                                                                                                                                                                                                                                                                           | 8-11               |
| Statistical methods       | 12     | (a) Describe all statistical methods, including those used to control for confounding                                                                                                                                                                                                                                                                                                                                                                                  | 10-11              |
|                           |        | (b) Describe any methods used to examine subgroups and interactions                                                                                                                                                                                                                                                                                                                                                                                                    | 10-11              |
|                           |        | (c) Explain how missing data were addressed                                                                                                                                                                                                                                                                                                                                                                                                                            | 10                 |
|                           |        | (d) <i>Cohort study</i> —If applicable, explain how loss to follow-up was addressed<br><i>Case-control study</i> —If applicable, explain how matching of cases and controls was addressed                                                                                                                                                                                                                                                                              |                    |



|                          |     |                                                                                                                                                                                                              |       |
|--------------------------|-----|--------------------------------------------------------------------------------------------------------------------------------------------------------------------------------------------------------------|-------|
|                          |     | <i>Cross-sectional study</i> —If applicable, describe analytical methods taking account of sampling strategy                                                                                                 | 10-11 |
|                          |     | (e) Describe any sensitivity analyses                                                                                                                                                                        | NA    |
| <b>Results</b>           |     |                                                                                                                                                                                                              |       |
| Participants             | 13* | (a) Report numbers of individuals at each stage of study—eg numbers potentially eligible, examined for eligibility, confirmed eligible, included in the study, completing follow-up, and analysed            | 16-17 |
|                          |     | (b) Give reasons for non-participation at each stage                                                                                                                                                         | 9     |
|                          |     | (c) Consider use of a flow diagram                                                                                                                                                                           | NA    |
| Descriptive data         | 14* | (a) Give characteristics of study participants (eg demographic, clinical, social) and information on exposures and potential confounders                                                                     | 12-13 |
|                          |     | (b) Indicate number of participants with missing data for each variable of interest                                                                                                                          | ND    |
|                          |     | (c) <i>Cohort study</i> —Summarise follow-up time (eg, average and total amount)                                                                                                                             |       |
| Outcome data             | 15* | <i>Cohort study</i> —Report numbers of outcome events or summary measures over time                                                                                                                          |       |
|                          |     | <i>Case-control study</i> —Report numbers in each exposure category, or summary measures of exposure                                                                                                         |       |
|                          |     | <i>Cross-sectional study</i> —Report numbers of outcome events or summary measures                                                                                                                           | 14    |
| Main results             | 16  | (a) Give unadjusted estimates and, if applicable, confounder-adjusted estimates and their precision (eg, 95% confidence interval). Make clear which confounders were adjusted for and why they were included | 14-20 |
|                          |     | (b) Report category boundaries when continuous variables were categorized                                                                                                                                    | NA    |
|                          |     | (c) If relevant, consider translating estimates of relative risk into absolute risk for a meaningful time period                                                                                             |       |
| Other analyses           | 17  | Report other analyses done—eg analyses of subgroups and interactions, and sensitivity analyses                                                                                                               | NA    |
| <b>Discussion</b>        |     |                                                                                                                                                                                                              |       |
| Key results              | 18  | Summarise key results with reference to study objectives                                                                                                                                                     | 21-24 |
| Limitations              | 19  | Discuss limitations of the study, taking into account sources of potential bias or imprecision. Discuss both direction and magnitude of any potential bias                                                   | 24-25 |
| Interpretation           | 20  | Give a cautious overall interpretation of results considering objectives, limitations, multiplicity of analyses, results from similar studies, and other relevant evidence                                   | 24-25 |
| Generalisability         | 21  | Discuss the generalisability (external validity) of the study results                                                                                                                                        | 24-25 |
| <b>Other information</b> |     |                                                                                                                                                                                                              |       |
| Funding                  | 22  | Give the source of funding and the role of the funders for the present study and, if applicable, for the original study on which the present article is based                                                | NA    |

\*Give information separately for cases and controls in case-control studies and, if applicable, for exposed and unexposed groups in cohort and cross-sectional studies.

**Note:** An Explanation and Elaboration article discusses each checklist item and gives methodological background and published examples of transparent reporting. The STROBE checklist is best used in conjunction with this article (freely available on the Web sites of PLoS Medicine at <http://www.plosmedicine.org/>, Annals of Internal Medicine at <http://www.annals.org/>, and Epidemiology at <http://www.epidem.com/>). Information on the STROBE Initiative is available at [www.strobe-statement.org](http://www.strobe-statement.org).
